# Supplementary material for: Oxidative cross-coupling of secondary phosphine chalcogenides with amino alcohols and aminophenols: aspects of the reaction chemoselectivity
Source: Royal Society of Chemistry journal article supplement (doi:10.1039/d1ob00287b), 2021-01-01

Supporting Information

**Oxidative cross-coupling of secondary phosphine chalcogenides with amino alcohols and aminophenols: aspects of the reaction chemoselectivity**

Kseniya O. Khrapova, Anton A. Telezhkin, Pavel A. Volkov,  
Lyudmila I. Larina, Dmitry V. Pavlov, Nina K. Gusarova and Boris A. Trofimov\*

*A.E. Favorsky Irkutsk Institute of Chemistry, Siberian Branch of the Russian Academy of Sciences, 1 Favorsky St., 664033 Irkutsk, Russian Federation*

**Table of contents**

|                                                    |            |
|----------------------------------------------------|------------|
| <b>1. The radical trapping reaction with TEMPO</b> | <b>S2</b>  |
| <b>2. Quantum chemical calculations</b>            | <b>S3</b>  |
| <b>3. NMR Spectra</b>                              | <b>S14</b> |

## 1. The radical trapping reaction with TEMPO

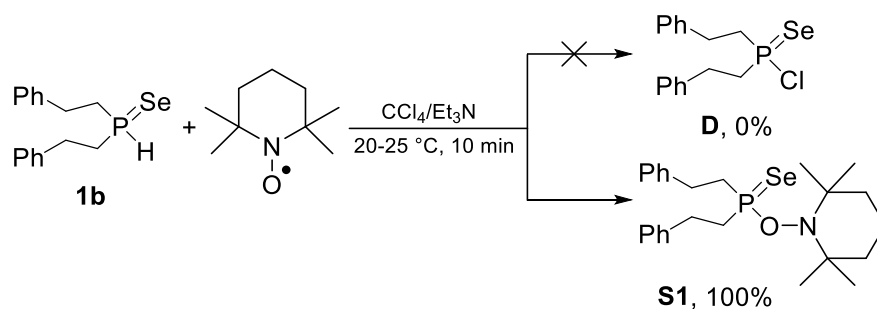

**Scheme S1** The radical trapping reaction of **1b** with TEMPO.

### Typical procedure and analytical data.

To a solution of secondary phosphine selenide **1b** (321 mg, 1.0 mmol) in CCl<sub>4</sub> (3 mL), Et<sub>3</sub>N (101 mg, 1.0 mmol) and TEMPO (156 mg, 1.0 mmol) was added. The mixture was stirred at 20–25 °C for 10 min. After completion of the reaction, the solvent was immediately removed under reduced pressure. The residue was dissolved in CDCl<sub>3</sub> and analyzed by NMR spectroscopy.

**1-[[bis(2-phenylethyl)phosphoroselenoyl]oxy]-2,2,6,6-tetramethylpiperidine (S1).** <sup>13</sup>C{<sup>1</sup>H} NMR (100.62 MHz, CDCl<sub>3</sub>): δ 15.6 (CH<sub>2</sub>CH<sub>2</sub>C(Me)<sub>2</sub>); 31.0 (d, PhCH<sub>2</sub>, <sup>2</sup>J<sub>PC</sub> = 3.6 Hz); 37.9 (d, CH<sub>2</sub>P, <sup>1</sup>J<sub>PC</sub> = 54.2 Hz); 41.4 (CH<sub>2</sub>CH<sub>2</sub>C(Me)<sub>2</sub>); 48.0 (CH<sub>2</sub>CH<sub>2</sub>C(Me)<sub>2</sub>); 62.5 (d, CH<sub>2</sub>CH<sub>2</sub>C(Me)<sub>2</sub>, <sup>3</sup>J<sub>PC</sub> = 2.2 Hz); 127.7 (C<sub>p</sub>); 129.3 (C<sub>o</sub>); 129.9 (C<sub>m</sub>); 141.4 (d, C<sub>i</sub>, <sup>3</sup>J<sub>PC</sub> = 15.6 Hz). <sup>15</sup>N NMR (40.56 MHz, CDCl<sub>3</sub>): δ -286.3. <sup>31</sup>P NMR (161.98 MHz, CDCl<sub>3</sub>): δ 113.0 (+ d-satellites, <sup>1</sup>J<sub>PSe</sub> = 787.1 Hz). <sup>77</sup>Se NMR (76.31 MHz, CDCl<sub>3</sub>): δ -217.1 (d, <sup>1</sup>J<sub>PSe</sub> = 789.8 Hz).

## 2. Quantum chemical calculations

**Table S1** Calculated geometry of chalcogenophosphoryl chlorides (**D**) and deprotonated phosphine chalcogenides in anionic (**A**) and radical (**B**) states. B3LYP/6-311++G(d,p)

|    |              |              |              |                                                                                                                                                                                                             |
|----|--------------|--------------|--------------|-------------------------------------------------------------------------------------------------------------------------------------------------------------------------------------------------------------|
| 6  | -3.709842000 | 5.139489000  | -0.285531000 | 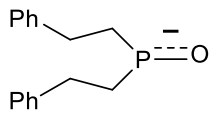 <p>Charge = -1. Multiplicity = 1</p>  |
| 6  | -3.004398000 | 4.098961000  | 0.315893000  |                                                                                                                                                                                                             |
| 6  | -3.055630000 | 2.793046000  | -0.192746000 |                                                                                                                                                                                                             |
| 6  | -3.847464000 | 2.569941000  | -1.328073000 |                                                                                                                                                                                                             |
| 6  | -4.555840000 | 3.605961000  | -1.935105000 |                                                                                                                                                                                                             |
| 6  | -4.490209000 | 4.899447000  | -1.417258000 |                                                                                                                                                                                                             |
| 1  | -3.652292000 | 6.140502000  | 0.130987000  |                                                                                                                                                                                                             |
| 1  | -2.398615000 | 4.294144000  | 1.195394000  |                                                                                                                                                                                                             |
| 1  | -3.905236000 | 1.566116000  | -1.738510000 |                                                                                                                                                                                                             |
| 1  | -5.162259000 | 3.402776000  | -2.812605000 |                                                                                                                                                                                                             |
| 1  | -5.041299000 | 5.707867000  | -1.886531000 |                                                                                                                                                                                                             |
| 6  | -2.263840000 | 1.675868000  | 0.444095000  |                                                                                                                                                                                                             |
| 1  | -2.192993000 | 1.836993000  | 1.524708000  |                                                                                                                                                                                                             |
| 1  | -2.793671000 | 0.726079000  | 0.301554000  |                                                                                                                                                                                                             |
| 6  | -0.833130000 | 1.535610000  | -0.102824000 |                                                                                                                                                                                                             |
| 1  | -0.296337000 | 2.481778000  | 0.043089000  |                                                                                                                                                                                                             |
| 1  | -0.853354000 | 1.313619000  | -1.178515000 |                                                                                                                                                                                                             |
| 6  | 1.794132000  | 0.430237000  | 0.000869000  |                                                                                                                                                                                                             |
| 1  | 2.410418000  | -0.426290000 | 0.297361000  |                                                                                                                                                                                                             |
| 1  | 1.702796000  | 0.393207000  | -1.092767000 |                                                                                                                                                                                                             |
| 6  | 2.473265000  | 1.731633000  | 0.474911000  |                                                                                                                                                                                                             |
| 1  | 1.985675000  | 2.592534000  | 0.007018000  |                                                                                                                                                                                                             |
| 1  | 2.287566000  | 1.808762000  | 1.553180000  |                                                                                                                                                                                                             |
| 6  | 3.951262000  | 1.784329000  | 0.187100000  |                                                                                                                                                                                                             |
| 6  | 4.462975000  | 2.463848000  | -0.928057000 |                                                                                                                                                                                                             |
| 6  | 4.869600000  | 1.125966000  | 1.021200000  |                                                                                                                                                                                                             |
| 6  | 5.829619000  | 2.484840000  | -1.204021000 |                                                                                                                                                                                                             |
| 1  | 3.773863000  | 2.984149000  | -1.587012000 |                                                                                                                                                                                                             |
| 6  | 6.235666000  | 1.142691000  | 0.750992000  |                                                                                                                                                                                                             |
| 1  | 4.496908000  | 0.598349000  | 1.893778000  |                                                                                                                                                                                                             |
| 6  | 6.726298000  | 1.822203000  | -0.365786000 |                                                                                                                                                                                                             |
| 1  | 6.195530000  | 3.021883000  | -2.074087000 |                                                                                                                                                                                                             |
| 1  | 6.922107000  | 0.627526000  | 1.416254000  |                                                                                                                                                                                                             |
| 1  | 7.790655000  | 1.837643000  | -0.576549000 |                                                                                                                                                                                                             |
| 8  | 0.234898000  | 0.624159000  | 2.279640000  |                                                                                                                                                                                                             |
| 15 | 0.081270000  | 0.117321000  | 0.812273000  |                                                                                                                                                                                                             |
| 6  | -3.920740000 | 5.092482000  | -0.217138000 |  <p>Charge = 0. Multiplicity = 2</p>                                                                                   |
| 6  | -3.243102000 | 4.036962000  | 0.390881000  |                                                                                                                                                                                                             |
| 6  | -3.116917000 | 2.799753000  | -0.250426000 |                                                                                                                                                                                                             |
| 6  | -3.692688000 | 2.645151000  | -1.516586000 |                                                                                                                                                                                                             |
| 6  | -4.371422000 | 3.697398000  | -2.128264000 |                                                                                                                                                                                                             |
| 6  | -4.486012000 | 4.926441000  | -1.480301000 |                                                                                                                                                                                                             |
| 1  | -4.012011000 | 6.042207000  | 0.298397000  |                                                                                                                                                                                                             |
| 1  | -2.813467000 | 4.172221000  | 1.378690000  |                                                                                                                                                                                                             |
| 1  | -3.616929000 | 1.688716000  | -2.025335000 |                                                                                                                                                                                                             |
| 1  | -4.815749000 | 3.555828000  | -3.107376000 |                                                                                                                                                                                                             |
| 1  | -5.016704000 | 5.745223000  | -1.952869000 |                                                                                                                                                                                                             |
| 6  | -2.350882000 | 1.666291000  | 0.397382000  |                                                                                                                                                                                                             |

|    |              |              |              |                                                                                                                                                                                                               |
|----|--------------|--------------|--------------|---------------------------------------------------------------------------------------------------------------------------------------------------------------------------------------------------------------|
| 1  | -2.406815000 | 1.750235000  | 1.485379000  | 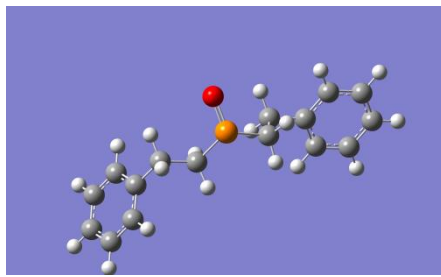                                                                                                                            |
| 1  | -2.810891000 | 0.709551000  | 0.131211000  |                                                                                                                                                                                                               |
| 6  | -0.869515000 | 1.654852000  | -0.025957000 |                                                                                                                                                                                                               |
| 1  | -0.400313000 | 2.615327000  | 0.216227000  |                                                                                                                                                                                                               |
| 1  | -0.770705000 | 1.502341000  | -1.105353000 |                                                                                                                                                                                                               |
| 6  | 1.850621000  | 0.473752000  | 0.215653000  |                                                                                                                                                                                                               |
| 1  | 2.367485000  | -0.436395000 | 0.531675000  |                                                                                                                                                                                                               |
| 1  | 1.825000000  | 0.465992000  | -0.878825000 |                                                                                                                                                                                                               |
| 6  | 2.598426000  | 1.719019000  | 0.750366000  |                                                                                                                                                                                                               |
| 1  | 2.086311000  | 2.626777000  | 0.418684000  |                                                                                                                                                                                                               |
| 1  | 2.556552000  | 1.709154000  | 1.842183000  |                                                                                                                                                                                                               |
| 6  | 4.037087000  | 1.752794000  | 0.283951000  |                                                                                                                                                                                                               |
| 6  | 4.389739000  | 2.388139000  | -0.911941000 |                                                                                                                                                                                                               |
| 6  | 5.043454000  | 1.122924000  | 1.025283000  |                                                                                                                                                                                                               |
| 6  | 5.710123000  | 2.393378000  | -1.357847000 |                                                                                                                                                                                                               |
| 1  | 3.624907000  | 2.891149000  | -1.496155000 |                                                                                                                                                                                                               |
| 6  | 6.364869000  | 1.125780000  | 0.583139000  |                                                                                                                                                                                                               |
| 1  | 4.790882000  | 0.632972000  | 1.960604000  |                                                                                                                                                                                                               |
| 6  | 6.702515000  | 1.760018000  | -0.611566000 |                                                                                                                                                                                                               |
| 1  | 5.964292000  | 2.896445000  | -2.284326000 |                                                                                                                                                                                                               |
| 1  | 7.131589000  | 0.637511000  | 1.174539000  |                                                                                                                                                                                                               |
| 1  | 7.730832000  | 1.765594000  | -0.954794000 |                                                                                                                                                                                                               |
| 8  | 0.001991000  | 0.403966000  | 2.338562000  |                                                                                                                                                                                                               |
| 15 | 0.106278000  | 0.323235000  | 0.826570000  |                                                                                                                                                                                                               |
| 6  | -3.974202000 | 5.099652000  | -0.174885000 |  <p>Charge = 0. Multiplicity = 1</p>  |
| 6  | -3.275930000 | 4.030408000  | 0.383707000  |                                                                                                                                                                                                               |
| 6  | -3.150931000 | 2.817946000  | -0.302949000 |                                                                                                                                                                                                               |
| 6  | -3.747497000 | 2.700607000  | -1.563253000 |                                                                                                                                                                                                               |
| 6  | -4.447156000 | 3.766895000  | -2.125154000 |                                                                                                                                                                                                               |
| 6  | -4.560692000 | 4.971481000  | -1.432854000 |                                                                                                                                                                                                               |
| 1  | -4.065570000 | 6.029799000  | 0.375070000  |                                                                                                                                                                                                               |
| 1  | -2.831195000 | 4.134983000  | 1.368634000  |                                                                                                                                                                                                               |
| 1  | -3.671888000 | 1.762952000  | -2.105506000 |                                                                                                                                                                                                               |
| 1  | -4.908367000 | 3.654845000  | -3.100205000 |                                                                                                                                                                                                               |
| 1  | -5.107711000 | 5.800719000  | -1.866967000 |                                                                                                                                                                                                               |
| 6  | -2.365102000 | 1.669184000  | 0.292179000  |                                                                                                                                                                                                               |
| 1  | -2.416015000 | 1.702633000  | 1.382884000  |                                                                                                                                                                                                               |
| 1  | -2.805996000 | 0.718270000  | -0.017985000 |                                                                                                                                                                                                               |
| 6  | -0.884663000 | 1.706226000  | -0.139602000 |                                                                                                                                                                                                               |
| 1  | -0.425890000 | 2.650318000  | 0.174215000  |                                                                                                                                                                                                               |
| 1  | -0.786456000 | 1.634317000  | -1.226168000 |                                                                                                                                                                                                               |
| 6  | 1.847751000  | 0.534630000  | 0.034566000  |                                                                                                                                                                                                               |
| 1  | 2.331103000  | -0.415535000 | 0.277834000  |                                                                                                                                                                                                               |
| 1  | 1.839545000  | 0.624600000  | -1.055347000 |                                                                                                                                                                                                               |
| 6  | 2.606000000  | 1.707628000  | 0.694930000  |                                                                                                                                                                                                               |
| 1  | 2.128389000  | 2.655752000  | 0.429763000  |                                                                                                                                                                                                               |
| 1  | 2.535920000  | 1.608175000  | 1.780841000  |                                                                                                                                                                                                               |
| 6  | 4.059292000  | 1.743656000  | 0.271313000  |                                                                                                                                                                                                               |
| 6  | 4.461545000  | 2.470046000  | -0.854404000 |                                                                                                                                                                                                               |
| 6  | 5.026695000  | 1.028437000  | 0.985476000  |                                                                                                                                                                                                               |
| 6  | 5.794828000  | 2.478859000  | -1.260526000 |                                                                                                                                                                                                               |
| 1  | 3.727074000  | 3.040575000  | -1.415014000 |                                                                                                                                                                                                               |
| 6  | 6.360658000  | 1.034452000  | 0.582618000  |                                                                                                                                                                                                               |

|    |              |              |              |                                                                                                                                                                                                             |
|----|--------------|--------------|--------------|-------------------------------------------------------------------------------------------------------------------------------------------------------------------------------------------------------------|
| 1  | 4.734254000  | 0.466975000  | 1.867406000  |                                                                                                                                                                                                             |
| 6  | 6.748721000  | 1.759158000  | -0.543168000 |                                                                                                                                                                                                             |
| 1  | 6.088829000  | 3.051828000  | -2.132969000 |                                                                                                                                                                                                             |
| 1  | 7.097259000  | 0.477829000  | 1.151271000  |                                                                                                                                                                                                             |
| 1  | 7.786762000  | 1.767320000  | -0.855578000 |                                                                                                                                                                                                             |
| 8  | -0.027114000 | 0.263347000  | 2.102271000  |                                                                                                                                                                                                             |
| 15 | 0.122686000  | 0.384737000  | 0.627372000  |                                                                                                                                                                                                             |
| 17 | -0.523428000 | -1.325401000 | -0.419081000 |                                                                                                                                                                                                             |
| 6  | -3.702104000 | 5.125984000  | -0.260701000 | 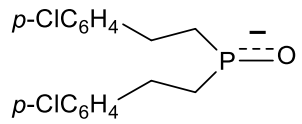 <p>Charge = -1. Multiplicity = 1</p>  |
| 6  | -2.994141000 | 4.079703000  | 0.327326000  |                                                                                                                                                                                                             |
| 6  | -3.061579000 | 2.770986000  | -0.170220000 |                                                                                                                                                                                                             |
| 6  | -3.876528000 | 2.547614000  | -1.287933000 |                                                                                                                                                                                                             |
| 6  | -4.593869000 | 3.578371000  | -1.893273000 |                                                                                                                                                                                                             |
| 6  | -4.496781000 | 4.861925000  | -1.370301000 |                                                                                                                                                                                                             |
| 1  | -3.640010000 | 6.131056000  | 0.138336000  |                                                                                                                                                                                                             |
| 1  | -2.372244000 | 4.282102000  | 1.193325000  |                                                                                                                                                                                                             |
| 1  | -3.951804000 | 1.543976000  | -1.694681000 |                                                                                                                                                                                                             |
| 1  | -5.220923000 | 3.386818000  | -2.755528000 |                                                                                                                                                                                                             |
| 17 | -5.407163000 | 6.183557000  | -2.126697000 |                                                                                                                                                                                                             |
| 6  | -2.263809000 | 1.654664000  | 0.458066000  |                                                                                                                                                                                                             |
| 1  | -2.169189000 | 1.823240000  | 1.535612000  |                                                                                                                                                                                                             |
| 1  | -2.801257000 | 0.706822000  | 0.333543000  |                                                                                                                                                                                                             |
| 6  | -0.845746000 | 1.504991000  | -0.117804000 |                                                                                                                                                                                                             |
| 1  | -0.305672000 | 2.453117000  | 0.000201000  |                                                                                                                                                                                                             |
| 1  | -0.887825000 | 1.263120000  | -1.188436000 |                                                                                                                                                                                                             |
| 6  | 1.789292000  | 0.417471000  | -0.014275000 |                                                                                                                                                                                                             |
| 1  | 2.410812000  | -0.434682000 | 0.283456000  |                                                                                                                                                                                                             |
| 1  | 1.694130000  | 0.376390000  | -1.107234000 |                                                                                                                                                                                                             |
| 6  | 2.459437000  | 1.724875000  | 0.456259000  |                                                                                                                                                                                                             |
| 1  | 1.975725000  | 2.580775000  | -0.024320000 |                                                                                                                                                                                                             |
| 1  | 2.260634000  | 1.809506000  | 1.531827000  |                                                                                                                                                                                                             |
| 6  | 3.939382000  | 1.778259000  | 0.185899000  |                                                                                                                                                                                                             |
| 6  | 4.464726000  | 2.440986000  | -0.931995000 |                                                                                                                                                                                                             |
| 6  | 4.849956000  | 1.136150000  | 1.039910000  |                                                                                                                                                                                                             |
| 6  | 5.833148000  | 2.466926000  | -1.197724000 |                                                                                                                                                                                                             |
| 1  | 3.787555000  | 2.950550000  | -1.610531000 |                                                                                                                                                                                                             |
| 6  | 6.220623000  | 1.148277000  | 0.794026000  |                                                                                                                                                                                                             |
| 1  | 4.473031000  | 0.620138000  | 1.917060000  |                                                                                                                                                                                                             |
| 6  | 6.699515000  | 1.815790000  | -0.328223000 |                                                                                                                                                                                                             |
| 1  | 6.220363000  | 2.987355000  | -2.065345000 |                                                                                                                                                                                                             |
| 1  | 6.908929000  | 0.651052000  | 1.466799000  |                                                                                                                                                                                                             |
| 17 | 8.443822000  | 1.843963000  | -0.650193000 |                                                                                                                                                                                                             |
| 8  | 0.244799000  | 0.637913000  | 2.267154000  |                                                                                                                                                                                                             |
| 15 | 0.082858000  | 0.103444000  | 0.810932000  |                                                                                                                                                                                                             |
| 6  | -3.933136000 | 5.075669000  | -0.198578000 |  <p>Charge = 0. Multiplicity = 2</p>                                                                                   |
| 6  | -3.250576000 | 4.018843000  | 0.399964000  |                                                                                                                                                                                                             |
| 6  | -3.127603000 | 2.778955000  | -0.235495000 |                                                                                                                                                                                                             |
| 6  | -3.716597000 | 2.622055000  | -1.494565000 |                                                                                                                                                                                                             |
| 6  | -4.403525000 | 3.666139000  | -2.109389000 |                                                                                                                                                                                                             |
| 6  | -4.503041000 | 4.888473000  | -1.453184000 |                                                                                                                                                                                                             |
| 1  | -4.026733000 | 6.029822000  | 0.304326000  |                                                                                                                                                                                                             |
| 1  | -2.813899000 | 4.163686000  | 1.382901000  |                                                                                                                                                                                                             |
| 1  | -3.648338000 | 1.666434000  | -2.004975000 |                                                                                                                                                                                                             |

|    |              |              |              |
|----|--------------|--------------|--------------|
| 1  | -4.860612000 | 3.532147000  | -3.081556000 |
| 17 | -5.370013000 | 6.215195000  | -2.219005000 |
| 6  | -2.355367000 | 1.648541000  | 0.409016000  |
| 1  | -2.402563000 | 1.735863000  | 1.497077000  |
| 1  | -2.818041000 | 0.691229000  | 0.150258000  |
| 6  | -0.877301000 | 1.635030000  | -0.026192000 |
| 1  | -0.406437000 | 2.597653000  | 0.203827000  |
| 1  | -0.785723000 | 1.471628000  | -1.104558000 |
| 6  | 1.846669000  | 0.462001000  | 0.224303000  |
| 1  | 2.363913000  | -0.446784000 | 0.543539000  |
| 1  | 1.821635000  | 0.450566000  | -0.870142000 |
| 6  | 2.591777000  | 1.709935000  | 0.757143000  |
| 1  | 2.080432000  | 2.616416000  | 0.421139000  |
| 1  | 2.545959000  | 1.703937000  | 1.848778000  |
| 6  | 4.031822000  | 1.744686000  | 0.296940000  |
| 6  | 4.392960000  | 2.383202000  | -0.893950000 |
| 6  | 5.036447000  | 1.113312000  | 1.038298000  |
| 6  | 5.712437000  | 2.393647000  | -1.340108000 |
| 1  | 3.635587000  | 2.889802000  | -1.483962000 |
| 6  | 6.361203000  | 1.112942000  | 0.608856000  |
| 1  | 4.785456000  | 0.618802000  | 1.971212000  |
| 6  | 6.687298000  | 1.754122000  | -0.581833000 |
| 1  | 5.981952000  | 2.895923000  | -2.260457000 |
| 1  | 7.132029000  | 0.626693000  | 1.193125000  |
| 17 | 8.357593000  | 1.762729000  | -1.132583000 |
| 8  | -0.000169000 | 0.411581000  | 2.347449000  |
| 15 | 0.102597000  | 0.312308000  | 0.836696000  |

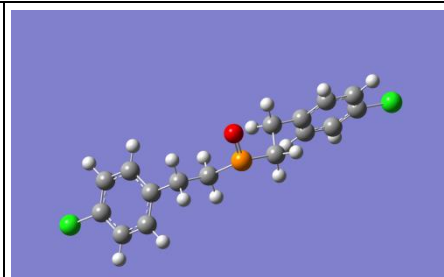

|    |              |              |              |
|----|--------------|--------------|--------------|
| 6  | -3.982839000 | 5.097309000  | -0.236568000 |
| 6  | -3.265951000 | 4.076603000  | 0.383956000  |
| 6  | -3.158235000 | 2.808131000  | -0.194970000 |
| 6  | -3.796754000 | 2.583851000  | -1.418983000 |
| 6  | -4.518602000 | 3.591321000  | -2.054587000 |
| 6  | -4.602271000 | 4.843955000  | -1.455744000 |
| 1  | -4.065505000 | 6.074164000  | 0.222749000  |
| 1  | -2.792488000 | 4.272836000  | 1.340699000  |
| 1  | -3.740111000 | 1.604505000  | -1.883552000 |
| 1  | -5.014535000 | 3.405843000  | -2.998843000 |
| 17 | -5.512627000 | 6.123875000  | -2.248308000 |
| 6  | -2.352030000 | 1.715540000  | 0.472676000  |
| 1  | -2.373563000 | 1.841580000  | 1.557492000  |
| 1  | -2.799336000 | 0.741849000  | 0.257234000  |
| 6  | -0.883849000 | 1.714587000  | -0.001175000 |
| 1  | -0.417293000 | 2.681077000  | 0.219208000  |
| 1  | -0.814451000 | 1.549915000  | -1.079843000 |
| 6  | 1.850952000  | 0.550640000  | 0.203768000  |
| 1  | 2.334622000  | -0.380983000 | 0.510018000  |
| 1  | 1.815620000  | 0.553141000  | -0.889363000 |
| 6  | 2.632250000  | 1.766262000  | 0.751003000  |
| 1  | 2.159653000  | 2.694709000  | 0.416474000  |
| 1  | 2.580529000  | 1.758223000  | 1.842395000  |
| 6  | 4.078038000  | 1.752914000  | 0.302762000  |
| 6  | 4.472470000  | 2.386816000  | -0.879270000 |
| 6  | 5.051348000  | 1.084180000  | 1.052151000  |

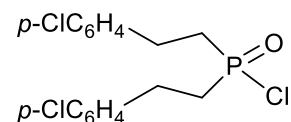

Charge = 0. Multiplicity = 1

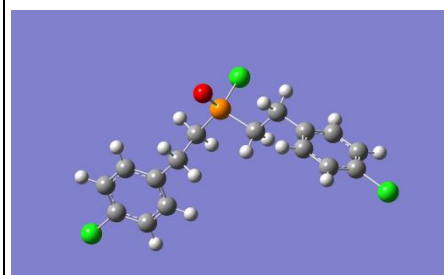

|    |              |              |              |                                                                                                                                                                                                              |
|----|--------------|--------------|--------------|--------------------------------------------------------------------------------------------------------------------------------------------------------------------------------------------------------------|
| 6  | 5.796571000  | 2.354802000  | -1.310748000 |                                                                                                                                                                                                              |
| 1  | 3.739451000  | 2.922316000  | -1.474428000 |                                                                                                                                                                                                              |
| 6  | 6.379901000  | 1.040594000  | 0.636887000  |                                                                                                                                                                                                              |
| 1  | 4.773063000  | 0.593092000  | 1.979092000  |                                                                                                                                                                                                              |
| 6  | 6.740482000  | 1.677982000  | -0.545838000 |                                                                                                                                                                                                              |
| 1  | 6.093344000  | 2.852636000  | -2.225078000 |                                                                                                                                                                                                              |
| 1  | 7.127074000  | 0.524332000  | 1.226046000  |                                                                                                                                                                                                              |
| 17 | 8.415969000  | 1.633566000  | -1.078525000 |                                                                                                                                                                                                              |
| 8  | 0.030749000  | 0.471369000  | 2.334147000  |                                                                                                                                                                                                              |
| 15 | 0.141289000  | 0.460070000  | 0.851110000  |                                                                                                                                                                                                              |
| 17 | -0.534457000 | -1.329470000 | -0.025058000 |                                                                                                                                                                                                              |
| 6  | -3.674062000 | 5.099505000  | -0.186851000 |                                                                                                                                                                                                              |
| 6  | -3.013976000 | 4.003284000  | 0.363648000  |                                                                                                                                                                                                              |
| 6  | -3.058810000 | 2.743684000  | -0.251591000 |                                                                                                                                                                                                              |
| 6  | -3.793217000 | 2.624078000  | -1.438499000 |                                                                                                                                                                                                              |
| 6  | -4.455705000 | 3.717916000  | -1.995554000 |                                                                                                                                                                                                              |
| 6  | -4.398806000 | 4.963464000  | -1.372020000 |                                                                                                                                                                                                              |
| 1  | -3.624931000 | 6.062955000  | 0.310946000  |                                                                                                                                                                                                              |
| 1  | -2.451080000 | 4.115686000  | 1.284908000  |                                                                                                                                                                                                              |
| 1  | -3.844697000 | 1.657031000  | -1.930119000 |                                                                                                                                                                                                              |
| 1  | -5.018376000 | 3.596215000  | -2.916076000 |                                                                                                                                                                                                              |
| 1  | -4.913889000 | 5.816528000  | -1.801399000 |                                                                                                                                                                                                              |
| 6  | -2.316843000 | 1.568013000  | 0.339487000  |                                                                                                                                                                                                              |
| 1  | -2.388166000 | 1.592836000  | 1.431898000  |                                                                                                                                                                                                              |
| 1  | -2.786612000 | 0.634471000  | 0.009962000  |                                                                                                                                                                                                              |
| 6  | -0.823467000 | 1.540911000  | -0.027446000 |                                                                                                                                                                                                              |
| 1  | -0.356325000 | 2.478190000  | 0.291973000  |                                                                                                                                                                                                              |
| 1  | -0.703385000 | 1.445764000  | -1.115448000 |                                                                                                                                                                                                              |
| 6  | 1.798894000  | 0.411118000  | 0.101899000  |                                                                                                                                                                                                              |
| 1  | 2.415691000  | -0.392333000 | 0.517126000  |                                                                                                                                                                                                              |
| 1  | 1.756048000  | 0.248430000  | -0.983272000 |                                                                                                                                                                                                              |
| 6  | 2.446383000  | 1.771125000  | 0.428990000  |                                                                                                                                                                                                              |
| 1  | 1.945186000  | 2.563616000  | -0.135276000 |                                                                                                                                                                                                              |
| 1  | 2.267050000  | 1.967453000  | 1.492769000  |                                                                                                                                                                                                              |
| 6  | 3.924298000  | 1.809792000  | 0.133208000  |                                                                                                                                                                                                              |
| 6  | 4.425812000  | 2.372805000  | -1.048335000 |                                                                                                                                                                                                              |
| 6  | 4.847587000  | 1.253741000  | 1.032760000  |                                                                                                                                                                                                              |
| 6  | 5.792495000  | 2.379891000  | -1.326532000 |                                                                                                                                                                                                              |
| 1  | 3.730900000  | 2.813156000  | -1.757502000 |                                                                                                                                                                                                              |
| 6  | 6.213377000  | 1.258134000  | 0.760551000  |                                                                                                                                                                                                              |
| 1  | 4.479257000  | 0.817976000  | 1.956398000  |                                                                                                                                                                                                              |
| 6  | 6.695348000  | 1.820439000  | -0.423080000 |                                                                                                                                                                                                              |
| 1  | 6.152603000  | 2.824572000  | -2.249336000 |                                                                                                                                                                                                              |
| 1  | 6.905697000  | 0.824828000  | 1.475843000  |                                                                                                                                                                                                              |
| 1  | 7.759432000  | 1.825252000  | -0.635543000 |                                                                                                                                                                                                              |
| 16 | 0.171649000  | 0.642331000  | 2.806446000  |                                                                                                                                                                                                              |
| 15 | 0.062730000  | 0.080327000  | 0.799383000  |                                                                                                                                                                                                              |
| 6  | -3.901100000 | 5.071592000  | -0.194248000 |                                                                                                                                                                                                              |
| 6  | -3.251285000 | 3.991126000  | 0.399170000  |                                                                                                                                                                                                              |
| 6  | -3.101225000 | 2.779110000  | -0.284501000 |                                                                                                                                                                                                              |
| 6  | -3.624597000 | 2.676069000  | -1.577945000 |                                                                                                                                                                                                              |
| 6  | -4.276180000 | 3.753819000  | -2.175346000 |                                                                                                                                                                                                              |
| 6  | -4.414886000 | 4.956758000  | -1.485189000 |                                                                                                                                                                                                              |
|    |              |              |              | 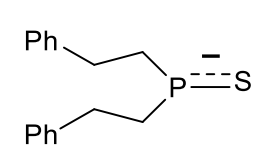 <p>Charge = -1. Multiplicity = 1</p>  |
| 6  | -3.901100000 | 5.071592000  | -0.194248000 |                                                                                                                                                                                                              |
| 6  | -3.251285000 | 3.991126000  | 0.399170000  |                                                                                                                                                                                                              |
| 6  | -3.101225000 | 2.779110000  | -0.284501000 |                                                                                                                                                                                                              |
| 6  | -3.624597000 | 2.676069000  | -1.577945000 |                                                                                                                                                                                                              |
| 6  | -4.276180000 | 3.753819000  | -2.175346000 |                                                                                                                                                                                                              |
| 6  | -4.414886000 | 4.956758000  | -1.485189000 |                                                                                                                         |

|    |              |              |              |
|----|--------------|--------------|--------------|
| 1  | -4.012260000 | 6.000678000  | 0.353966000  |
| 1  | -2.862835000 | 4.086378000  | 1.408518000  |
| 1  | -3.528824000 | 1.739997000  | -2.119903000 |
| 1  | -4.680179000 | 3.651821000  | -3.176594000 |
| 1  | -4.924383000 | 5.795218000  | -1.946417000 |
| 6  | -2.365282000 | 1.618767000  | 0.350794000  |
| 1  | -2.536655000 | 1.614643000  | 1.430445000  |
| 1  | -2.760120000 | 0.674039000  | -0.034845000 |
| 6  | -0.850235000 | 1.683666000  | 0.085914000  |
| 1  | -0.441210000 | 2.628275000  | 0.456915000  |
| 1  | -0.645808000 | 1.633083000  | -0.988792000 |
| 6  | 1.843711000  | 0.456967000  | 0.280807000  |
| 1  | 2.375727000  | -0.415287000 | 0.668707000  |
| 1  | 1.824808000  | 0.362861000  | -0.810151000 |
| 6  | 2.569049000  | 1.754301000  | 0.705478000  |
| 1  | 2.039615000  | 2.622157000  | 0.302628000  |
| 1  | 2.534201000  | 1.833013000  | 1.795213000  |
| 6  | 4.005313000  | 1.774743000  | 0.230483000  |
| 6  | 4.345776000  | 2.329968000  | -1.008057000 |
| 6  | 5.022402000  | 1.211747000  | 1.010202000  |
| 6  | 5.664811000  | 2.321849000  | -1.458104000 |
| 1  | 3.572445000  | 2.780369000  | -1.623171000 |
| 6  | 6.342366000  | 1.201855000  | 0.564292000  |
| 1  | 4.779068000  | 0.784310000  | 1.978084000  |
| 6  | 6.667895000  | 1.756187000  | -0.672831000 |
| 1  | 5.909439000  | 2.761704000  | -2.418686000 |
| 1  | 7.117349000  | 0.766264000  | 1.185284000  |
| 1  | 7.695098000  | 1.751877000  | -1.019438000 |
| 16 | -0.054789000 | 0.263569000  | 2.860142000  |
| 15 | 0.090872000  | 0.279689000  | 0.871493000  |

Charge = 0. Multiplicity = 2

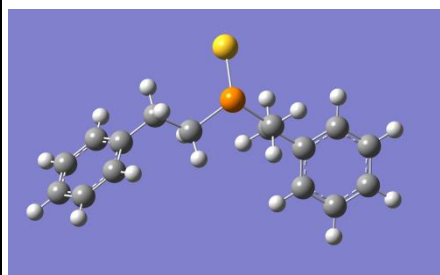

|   |              |              |              |
|---|--------------|--------------|--------------|
| 6 | -3.919589000 | 5.077869000  | -0.190691000 |
| 6 | -3.263018000 | 3.982611000  | 0.367490000  |
| 6 | -3.116312000 | 2.791181000  | -0.351505000 |
| 6 | -3.647573000 | 2.722198000  | -1.643911000 |
| 6 | -4.305119000 | 3.815177000  | -2.205837000 |
| 6 | -4.441371000 | 4.997862000  | -1.480929000 |
| 1 | -4.029477000 | 5.990666000  | 0.384375000  |
| 1 | -2.869449000 | 4.049648000  | 1.377186000  |
| 1 | -3.553512000 | 1.801771000  | -2.212122000 |
| 1 | -4.715657000 | 3.740749000  | -3.206776000 |
| 1 | -4.955608000 | 5.847782000  | -1.915091000 |
| 6 | -2.377519000 | 1.612403000  | 0.246043000  |
| 1 | -2.528016000 | 1.582106000  | 1.327811000  |
| 1 | -2.778527000 | 0.680058000  | -0.159176000 |
| 6 | -0.867894000 | 1.683914000  | -0.046929000 |
| 1 | -0.444117000 | 2.602206000  | 0.371856000  |
| 1 | -0.676695000 | 1.683975000  | -1.123854000 |
| 6 | 1.842530000  | 0.511740000  | 0.090841000  |
| 1 | 2.341336000  | -0.437320000 | 0.302131000  |
| 1 | 1.807661000  | 0.629072000  | -0.996124000 |
| 6 | 2.597765000  | 1.678887000  | 0.759140000  |
| 1 | 2.092469000  | 2.624190000  | 0.541057000  |
| 1 | 2.570803000  | 1.544507000  | 1.843297000  |

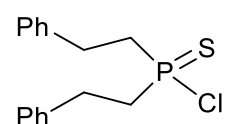

Charge = 0. Multiplicity = 1

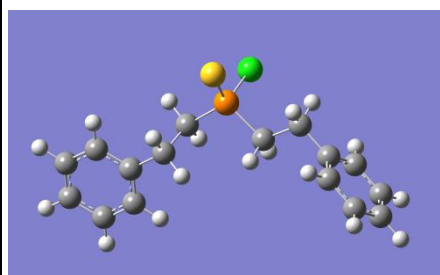



|    |              |              |              |  |
|----|--------------|--------------|--------------|--|
| 6  | 4.032682000  | 1.755685000  | 0.280485000  |  |
| 6  | 4.387993000  | 2.573679000  | -0.796853000 |  |
| 6  | 5.028624000  | 0.986061000  | 0.891953000  |  |
| 6  | 5.703377000  | 2.619830000  | -1.256010000 |  |
| 1  | 3.630989000  | 3.186158000  | -1.277411000 |  |
| 6  | 6.344385000  | 1.029174000  | 0.435933000  |  |
| 1  | 4.773111000  | 0.353137000  | 1.736219000  |  |
| 6  | 6.685671000  | 1.845803000  | -0.641366000 |  |
| 1  | 5.960952000  | 3.263695000  | -2.089648000 |  |
| 1  | 7.103732000  | 0.429425000  | 0.925283000  |  |
| 1  | 7.709711000  | 1.882341000  | -0.995176000 |  |
| 16 | -0.110375000 | 0.015656000  | 2.596131000  |  |
| 15 | 0.112173000  | 0.308384000  | 0.684939000  |  |
| 17 | -0.498771000 | -1.315067000 | -0.540142000 |  |
| 6  | -3.632141000 | 5.099005000  | -0.185585000 |  |
| 6  | -2.961119000 | 4.001362000  | 0.347925000  |  |
| 6  | -3.070295000 | 2.724395000  | -0.220729000 |  |
| 6  | -3.883862000 | 2.586573000  | -1.351393000 |  |
| 6  | -4.564663000 | 3.671770000  | -1.903593000 |  |
| 6  | -4.428881000 | 4.920491000  | -1.311428000 |  |
| 1  | -3.540874000 | 6.078510000  | 0.267562000  |  |
| 1  | -2.338788000 | 4.134613000  | 1.226814000  |  |
| 1  | -3.990163000 | 1.609174000  | -1.811551000 |  |
| 1  | -5.191970000 | 3.547740000  | -2.777870000 |  |
| 17 | -5.290279000 | 6.309654000  | -1.998915000 |  |
| 6  | -2.316286000 | 1.552861000  | 0.360610000  |  |
| 1  | -2.338740000 | 1.601908000  | 1.454571000  |  |
| 1  | -2.810662000 | 0.618630000  | 0.072553000  |  |
| 6  | -0.840627000 | 1.502307000  | -0.068950000 |  |
| 1  | -0.357860000 | 2.450994000  | 0.188489000  |  |
| 1  | -0.765906000 | 1.358279000  | -1.155551000 |  |
| 6  | 1.793081000  | 0.398734000  | 0.052774000  |  |
| 1  | 2.419031000  | -0.393856000 | 0.474588000  |  |
| 1  | 1.737950000  | 0.217061000  | -1.028548000 |  |
| 6  | 2.431500000  | 1.769428000  | 0.353374000  |  |
| 1  | 1.949311000  | 2.543446000  | -0.251154000 |  |
| 1  | 2.218680000  | 1.997672000  | 1.405540000  |  |
| 6  | 3.917514000  | 1.801241000  | 0.108967000  |  |
| 6  | 4.468120000  | 2.369090000  | -1.046835000 |  |
| 6  | 4.804430000  | 1.236565000  | 1.038833000  |  |
| 6  | 5.843576000  | 2.377518000  | -1.278334000 |  |
| 1  | 3.808401000  | 2.818536000  | -1.782587000 |  |
| 6  | 6.180656000  | 1.234254000  | 0.828227000  |  |
| 1  | 4.403633000  | 0.796658000  | 1.946449000  |  |
| 6  | 6.687105000  | 1.805905000  | -0.334531000 |  |
| 1  | 6.252639000  | 2.823466000  | -2.176745000 |  |
| 1  | 6.852065000  | 0.798791000  | 1.558234000  |  |
| 17 | 8.438287000  | 1.811109000  | -0.613802000 |  |
| 16 | 0.214600000  | 0.706136000  | 2.769513000  |  |
| 15 | 0.070625000  | 0.073161000  | 0.787395000  |  |
| 6  | -3.954056000 | 5.035393000  | -0.158443000 |  |
| 6  | -3.301225000 | 3.951185000  | 0.423287000  |  |
| 6  | -3.115176000 | 2.753357000  | -0.274989000 |  |

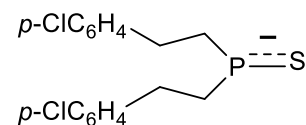

Charge = -1. Multiplicity = 1

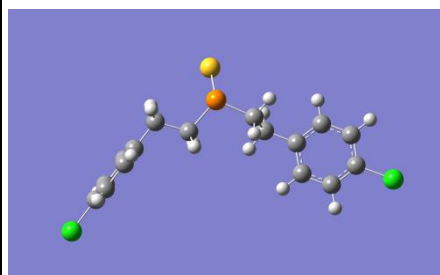

|    |              |              |              |
|----|--------------|--------------|--------------|
| 6  | -3.609595000 | 2.667688000  | -1.580421000 |
| 6  | -4.265624000 | 3.740628000  | -2.179730000 |
| 6  | -4.429662000 | 4.919443000  | -1.460327000 |
| 1  | -4.097904000 | 5.955863000  | 0.393025000  |
| 1  | -2.938423000 | 4.040211000  | 1.442271000  |
| 1  | -3.490294000 | 1.745871000  | -2.141017000 |
| 1  | -4.649368000 | 3.661506000  | -3.188955000 |
| 17 | -5.258658000 | 6.281488000  | -2.205300000 |
| 6  | -2.374394000 | 1.594733000  | 0.356435000  |
| 1  | -2.544371000 | 1.589880000  | 1.436167000  |
| 1  | -2.767372000 | 0.649066000  | -0.028617000 |
| 6  | -0.859844000 | 1.663846000  | 0.088658000  |
| 1  | -0.455769000 | 2.616459000  | 0.444163000  |
| 1  | -0.655363000 | 1.596416000  | -0.985055000 |
| 6  | 1.838068000  | 0.450271000  | 0.300845000  |
| 1  | 2.369496000  | -0.424243000 | 0.684423000  |
| 1  | 1.814007000  | 0.358349000  | -0.790177000 |
| 6  | 2.567860000  | 1.745011000  | 0.726541000  |
| 1  | 2.039196000  | 2.615596000  | 0.328958000  |
| 1  | 2.536782000  | 1.820517000  | 1.816601000  |
| 6  | 4.002461000  | 1.765368000  | 0.248270000  |
| 6  | 4.348419000  | 2.348831000  | -0.974772000 |
| 6  | 5.017931000  | 1.174687000  | 1.008582000  |
| 6  | 5.663700000  | 2.345283000  | -1.433781000 |
| 1  | 3.582544000  | 2.823011000  | -1.580501000 |
| 6  | 6.338275000  | 1.160907000  | 0.566755000  |
| 1  | 4.778605000  | 0.722964000  | 1.965973000  |
| 6  | 6.649317000  | 1.747633000  | -0.655771000 |
| 1  | 5.921440000  | 2.804775000  | -2.379496000 |
| 1  | 7.117376000  | 0.706347000  | 1.165355000  |
| 17 | 8.314581000  | 1.739843000  | -1.222182000 |
| 16 | -0.052031000 | 0.308096000  | 2.888004000  |
| 15 | 0.087164000  | 0.276907000  | 0.899537000  |

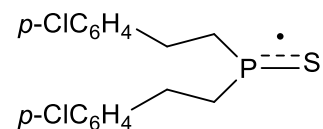

Charge = 0. Multiplicity = 2

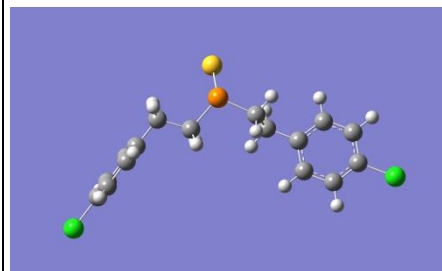

|    |              |              |              |
|----|--------------|--------------|--------------|
| 6  | -3.949625000 | 5.078782000  | -0.249046000 |
| 6  | -3.286015000 | 4.031303000  | 0.385717000  |
| 6  | -3.127515000 | 2.788574000  | -0.235949000 |
| 6  | -3.659040000 | 2.618089000  | -1.518291000 |
| 6  | -4.325437000 | 3.653543000  | -2.169469000 |
| 6  | -4.462347000 | 4.879255000  | -1.526490000 |
| 1  | -4.072792000 | 6.035185000  | 0.242966000  |
| 1  | -2.894827000 | 4.185560000  | 1.386311000  |
| 1  | -3.561381000 | 1.659418000  | -2.017761000 |
| 1  | -4.738374000 | 3.509836000  | -3.159820000 |
| 17 | -5.303314000 | 6.194280000  | -2.337967000 |
| 6  | -2.379153000 | 1.666260000  | 0.450296000  |
| 1  | -2.507500000 | 1.735279000  | 1.533046000  |
| 1  | -2.791308000 | 0.702809000  | 0.140429000  |
| 6  | -0.875606000 | 1.703544000  | 0.120801000  |
| 1  | -0.442284000 | 2.657630000  | 0.437249000  |
| 1  | -0.706215000 | 1.595017000  | -0.954341000 |
| 6  | 1.830642000  | 0.527728000  | 0.306700000  |
| 1  | 2.328846000  | -0.397161000 | 0.607921000  |
| 1  | 1.765570000  | 0.524309000  | -0.785136000 |

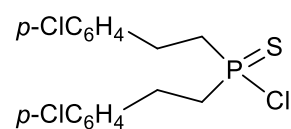

Charge = 0. Multiplicity = 1

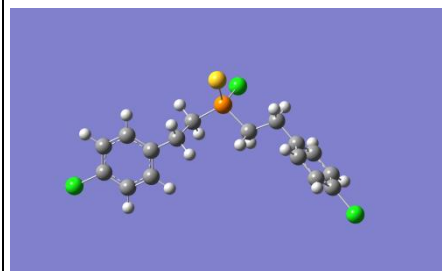

|                               |              |              |              |                                                                                      |
|-------------------------------|--------------|--------------|--------------|--------------------------------------------------------------------------------------|
| 6                             | 2.610995000  | 1.754502000  | 0.821710000  |                                                                                      |
| 1                             | 2.107445000  | 2.674487000  | 0.511203000  |                                                                                      |
| 1                             | 2.610404000  | 1.743451000  | 1.914312000  |                                                                                      |
| 6                             | 4.034028000  | 1.762971000  | 0.305017000  |                                                                                      |
| 6                             | 4.366036000  | 2.422588000  | -0.882045000 |                                                                                      |
| 6                             | 5.047026000  | 1.086115000  | 0.992006000  |                                                                                      |
| 6                             | 5.667712000  | 2.409252000  | -1.378130000 |                                                                                      |
| 1                             | 3.601363000  | 2.964243000  | -1.429920000 |                                                                                      |
| 6                             | 6.353940000  | 1.061322000  | 0.511876000  |                                                                                      |
| 1                             | 4.817766000  | 0.574116000  | 1.921048000  |                                                                                      |
| 6                             | 6.652175000  | 1.724177000  | -0.674297000 |                                                                                      |
| 1                             | 5.915932000  | 2.927502000  | -2.295555000 |                                                                                      |
| 1                             | 7.132299000  | 0.539218000  | 1.053557000  |                                                                                      |
| 17                            | 8.299907000  | 1.702406000  | -1.288591000 |                                                                                      |
| 16                            | -0.049347000 | 0.327136000  | 2.905721000  |                                                                                      |
| 15                            | 0.116775000  | 0.404934000  | 0.968850000  |                                                                                      |
| 17                            | -0.538302000 | -1.333531000 | -0.054939000 |                                                                                      |
| 6                             | -3.664455000 | 5.100653000  | -0.177344000 |                                                                                      |
| 6                             | -3.009853000 | 3.997013000  | 0.364880000  |                                                                                      |
| 6                             | -3.056172000 | 2.744053000  | -0.263612000 |                                                                                      |
| 6                             | -3.784724000 | 2.638423000  | -1.455199000 |                                                                                      |
| 6                             | -4.441761000 | 3.739896000  | -2.003856000 |                                                                                      |
| 6                             | -4.384223000 | 4.978633000  | -1.367024000 |                                                                                      |
| 1                             | -3.615124000 | 6.058595000  | 0.330852000  |                                                                                      |
| 1                             | -2.452023000 | 4.097723000  | 1.290565000  |                                                                                      |
| 1                             | -3.836783000 | 1.676684000  | -1.957047000 |                                                                                      |
| 1                             | -5.000454000 | 3.629546000  | -2.928191000 |                                                                                      |
| 1                             | -4.895293000 | 5.837407000  | -1.789743000 |                                                                                      |
| 6                             | -2.322524000 | 1.559516000  | 0.320678000  |                                                                                      |
| 1                             | -2.412666000 | 1.566036000  | 1.412182000  |                                                                                      |
| 1                             | -2.784896000 | 0.631262000  | -0.032820000 |                                                                                      |
| 6                             | -0.823110000 | 1.542426000  | -0.021676000 |                                                                                      |
| 1                             | -0.363599000 | 2.476838000  | 0.314717000  |                                                                                      |
| 1                             | -0.687260000 | 1.463779000  | -1.109403000 |                                                                                      |
| 6                             | 1.800080000  | 0.401846000  | 0.114938000  |                                                                                      |
| 1                             | 2.413707000  | -0.395365000 | 0.545714000  |                                                                                      |
| 1                             | 1.772109000  | 0.227607000  | -0.969172000 |                                                                                      |
| 6                             | 2.442216000  | 1.767537000  | 0.428263000  |                                                                                      |
| 1                             | 1.936608000  | 2.552173000  | -0.142861000 |                                                                                      |
| 1                             | 2.267034000  | 1.974959000  | 1.490524000  |                                                                                      |
| 6                             | 3.919671000  | 1.806980000  | 0.127387000  |                                                                                      |
| 6                             | 4.416466000  | 2.362918000  | -1.059227000 |                                                                                      |
| 6                             | 4.845774000  | 1.259247000  | 1.028838000  |                                                                                      |
| 6                             | 5.782416000  | 2.370353000  | -1.341452000 |                                                                                      |
| 1                             | 3.718822000  | 2.797371000  | -1.769330000 |                                                                                      |
| 6                             | 6.210748000  | 1.264074000  | 0.752532000  |                                                                                      |
| 1                             | 4.480560000  | 0.830095000  | 1.956767000  |                                                                                      |
| 6                             | 6.688375000  | 1.818725000  | -0.436473000 |                                                                                      |
| 1                             | 6.139285000  | 2.809291000  | -2.268203000 |                                                                                      |
| 1                             | 6.905859000  | 0.837458000  | 1.469082000  |                                                                                      |
| 1                             | 7.751902000  | 1.824053000  | -0.651595000 |                                                                                      |
| 34                            | 0.155790000  | 0.638071000  | 2.958439000  |                                                                                      |
| 15                            | 0.055591000  | 0.067306000  | 0.782186000  |                                                                                      |
| 6                             | -3.009853000 | 3.997013000  | 0.364880000  | 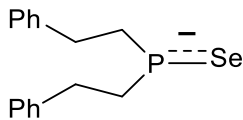  |
| Charge = -1. Multiplicity = 1 |              |              |              |  |

|    |              |              |              |
|----|--------------|--------------|--------------|
| 6  | -3.874921000 | 5.065390000  | -0.166750000 |
| 6  | -3.237661000 | 3.968954000  | 0.410709000  |
| 6  | -3.091117000 | 2.768931000  | -0.294667000 |
| 6  | -3.605283000 | 2.694360000  | -1.593814000 |
| 6  | -4.244296000 | 3.788255000  | -2.175350000 |
| 6  | -4.379469000 | 4.978891000  | -1.463539000 |
| 1  | -3.983283000 | 5.984777000  | 0.398125000  |
| 1  | -2.856237000 | 4.041927000  | 1.424606000  |
| 1  | -3.512255000 | 1.768179000  | -2.152976000 |
| 1  | -4.641241000 | 3.708556000  | -3.181450000 |
| 1  | -4.879193000 | 5.829694000  | -1.912733000 |
| 6  | -2.368203000 | 1.592106000  | 0.325252000  |
| 1  | -2.546792000 | 1.572423000  | 1.403682000  |
| 1  | -2.767928000 | 0.656993000  | -0.078429000 |
| 6  | -0.851300000 | 1.650214000  | 0.071214000  |
| 1  | -0.441597000 | 2.595008000  | 0.438857000  |
| 1  | -0.642294000 | 1.595756000  | -1.002827000 |
| 6  | 1.841199000  | 0.439255000  | 0.283459000  |
| 1  | 2.384573000  | -0.417865000 | 0.688790000  |
| 1  | 1.831084000  | 0.324058000  | -0.806051000 |
| 6  | 2.546956000  | 1.754138000  | 0.683224000  |
| 1  | 2.009441000  | 2.606270000  | 0.258232000  |
| 1  | 2.504363000  | 1.856088000  | 1.770863000  |
| 6  | 3.986103000  | 1.783000000  | 0.217408000  |
| 6  | 4.331364000  | 2.331165000  | -1.022944000 |
| 6  | 5.001948000  | 1.233920000  | 1.008867000  |
| 6  | 5.653853000  | 2.329938000  | -1.463082000 |
| 1  | 3.559020000  | 2.770591000  | -1.647110000 |
| 6  | 6.325219000  | 1.231036000  | 0.573031000  |
| 1  | 4.754634000  | 0.812036000  | 1.978197000  |
| 6  | 6.655456000  | 1.778276000  | -0.666109000 |
| 1  | 5.902308000  | 2.764016000  | -2.425324000 |
| 1  | 7.099021000  | 0.806403000  | 1.203029000  |
| 1  | 7.685187000  | 1.779479000  | -1.005189000 |
| 34 | -0.062124000 | 0.275573000  | 3.008462000  |
| 15 | 0.081560000  | 0.235391000  | 0.856655000  |

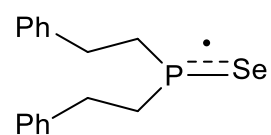

Charge = 0. Multiplicity = 2

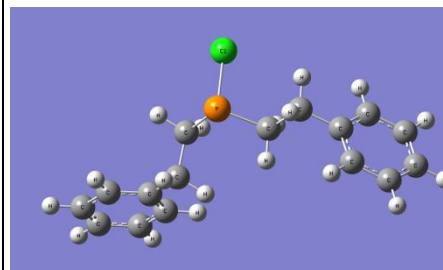

|   |              |             |              |
|---|--------------|-------------|--------------|
| 6 | -3.931536000 | 5.061570000 | -0.133667000 |
| 6 | -3.286811000 | 3.948405000 | 0.402551000  |
| 6 | -3.114418000 | 2.784932000 | -0.355452000 |
| 6 | -3.608030000 | 2.762119000 | -1.664374000 |
| 6 | -4.253341000 | 3.873234000 | -2.204425000 |
| 6 | -4.415500000 | 5.027835000 | -1.440484000 |
| 1 | -4.061604000 | 5.952158000 | 0.471243000  |
| 1 | -2.922264000 | 3.979176000 | 1.424783000  |
| 1 | -3.494485000 | 1.863530000 | -2.263184000 |
| 1 | -4.634575000 | 3.834782000 | -3.218887000 |
| 1 | -4.920522000 | 5.891685000 | -1.857640000 |
| 6 | -2.386924000 | 1.588442000 | 0.220372000  |
| 1 | -2.547745000 | 1.533362000 | 1.299725000  |
| 1 | -2.786342000 | 0.667253000 | -0.211323000 |
| 6 | -0.874519000 | 1.663719000 | -0.055310000 |
| 1 | -0.459145000 | 2.583210000 | 0.368718000  |
| 1 | -0.670058000 | 1.663834000 | -1.130137000 |

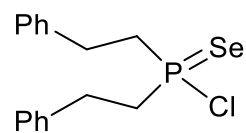

Charge = 0. Multiplicity = 1

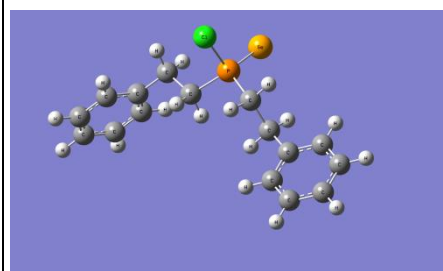

|    |              |              |              |
|----|--------------|--------------|--------------|
| 6  | 1.840543000  | 0.503494000  | 0.088892000  |
| 1  | 2.348916000  | -0.435441000 | 0.321220000  |
| 1  | 1.800856000  | 0.594894000  | -1.000464000 |
| 6  | 2.585502000  | 1.693345000  | 0.726958000  |
| 1  | 2.076514000  | 2.628801000  | 0.476551000  |
| 1  | 2.552809000  | 1.591769000  | 1.814299000  |
| 6  | 4.023104000  | 1.762502000  | 0.254818000  |
| 6  | 4.369327000  | 2.492769000  | -0.886812000 |
| 6  | 5.031178000  | 1.075173000  | 0.939560000  |
| 6  | 5.687948000  | 2.534448000  | -1.336278000 |
| 1  | 3.602153000  | 3.041059000  | -1.425370000 |
| 6  | 6.350721000  | 1.114265000  | 0.493350000  |
| 1  | 4.782266000  | 0.510447000  | 1.832665000  |
| 6  | 6.683074000  | 1.843370000  | -0.647288000 |
| 1  | 5.938162000  | 3.110183000  | -2.220463000 |
| 1  | 7.119735000  | 0.579610000  | 1.039769000  |
| 1  | 7.709877000  | 1.876864000  | -0.993334000 |
| 34 | -0.126545000 | -0.003083000 | 2.754377000  |
| 15 | 0.109207000  | 0.292213000  | 0.686545000  |
| 17 | -0.490163000 | -1.338710000 | -0.538878000 |

**Table S2** The energy of the stages of the chalcogenophosphoryl chlorides formation reaction (kcal·mol<sup>-1</sup>)

| Phosphine chalcogenides | <b>1</b> + Et <sub>3</sub> N → <b>A</b> + Et <sub>3</sub> NH <sup>+</sup> | <b>A</b> + CCl <sub>4</sub> → <b>B</b> + <b>C</b> | <b>B</b> + <b>C</b> → <b>D</b> + <sup>-</sup> CCl <sub>3</sub> |
|-------------------------|---------------------------------------------------------------------------|---------------------------------------------------|----------------------------------------------------------------|
|                         | 107.2                                                                     | 12.2                                              | -34.4                                                          |
|                         | 114.0                                                                     | 7.3                                               | -38.0                                                          |
|                         | 108.5                                                                     | 12.8                                              | -37.8                                                          |
|                         | 99.8                                                                      | 14.7                                              | -27.8                                                          |
|                         | 94.5                                                                      | 20.0                                              | -27.6                                                          |
|                         | 95.4                                                                      | 16.5                                              | -24.1                                                          |

### 3. NMR Spectra

#### *N*-butyl-bis(2-phenylethyl)phosphinothioic amide (2a)

<sup>1</sup>H-NMR

7.34  
7.32  
7.31  
7.26 CDCl<sub>3</sub>  
7.26  
7.24

3.07  
3.05  
3.04  
3.03  
3.02  
3.01  
2.99  
2.98  
2.97  
2.89  
2.87  
2.85  
2.84  
2.82  
2.27  
2.24  
2.23  
2.22  
2.21  
2.20  
2.18  
2.17  
2.16  
1.98  
1.47  
1.46  
1.45  
1.44  
1.43  
1.42  
1.38  
1.36  
1.34  
1.33  
0.97  
0.95  
0.93

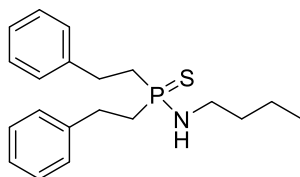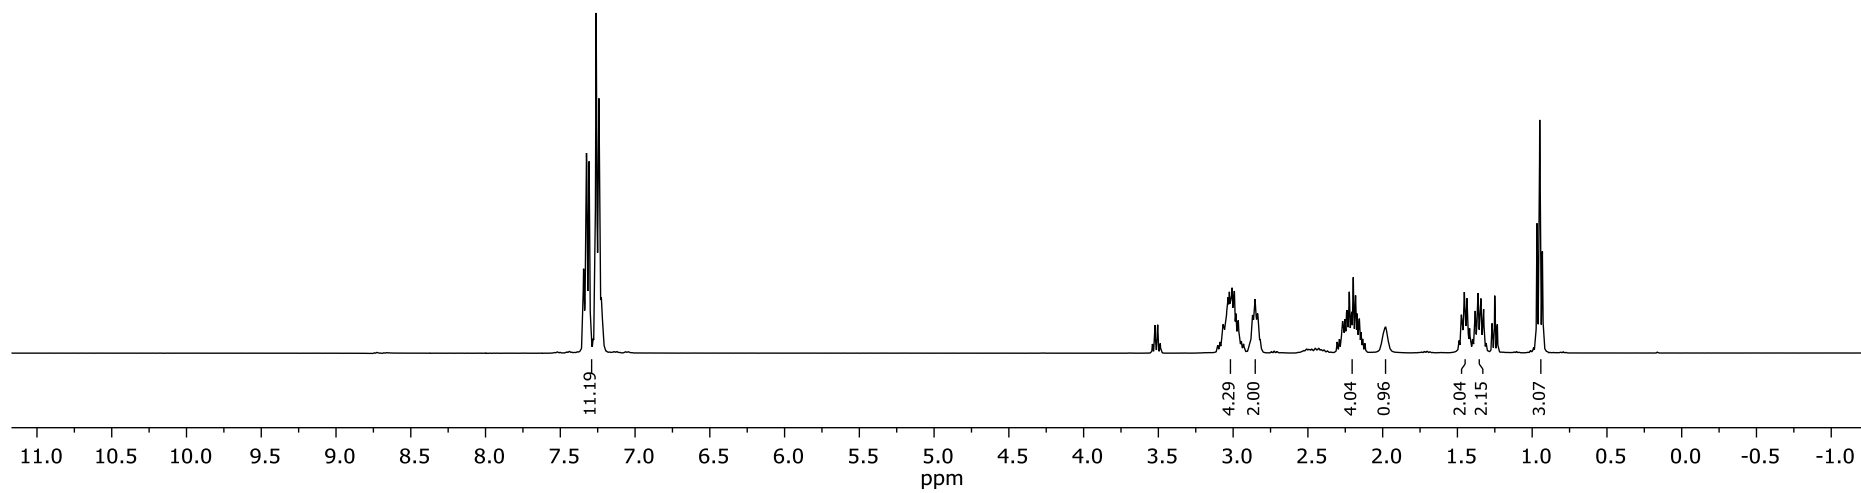

***N*-butyl-bis(2-phenylethyl)phosphinothioic amide (2a)**

<sup>13</sup>C\_NMR

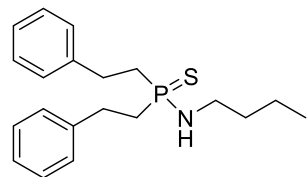

140.91  
140.76

128.49  
128.15  
126.24

77.48  
77.16 CDCl<sub>3</sub>  
76.84

41.01  
40.98  
34.83  
34.20  
33.77  
33.70  
28.48  
28.45

— 19.80

— 13.66

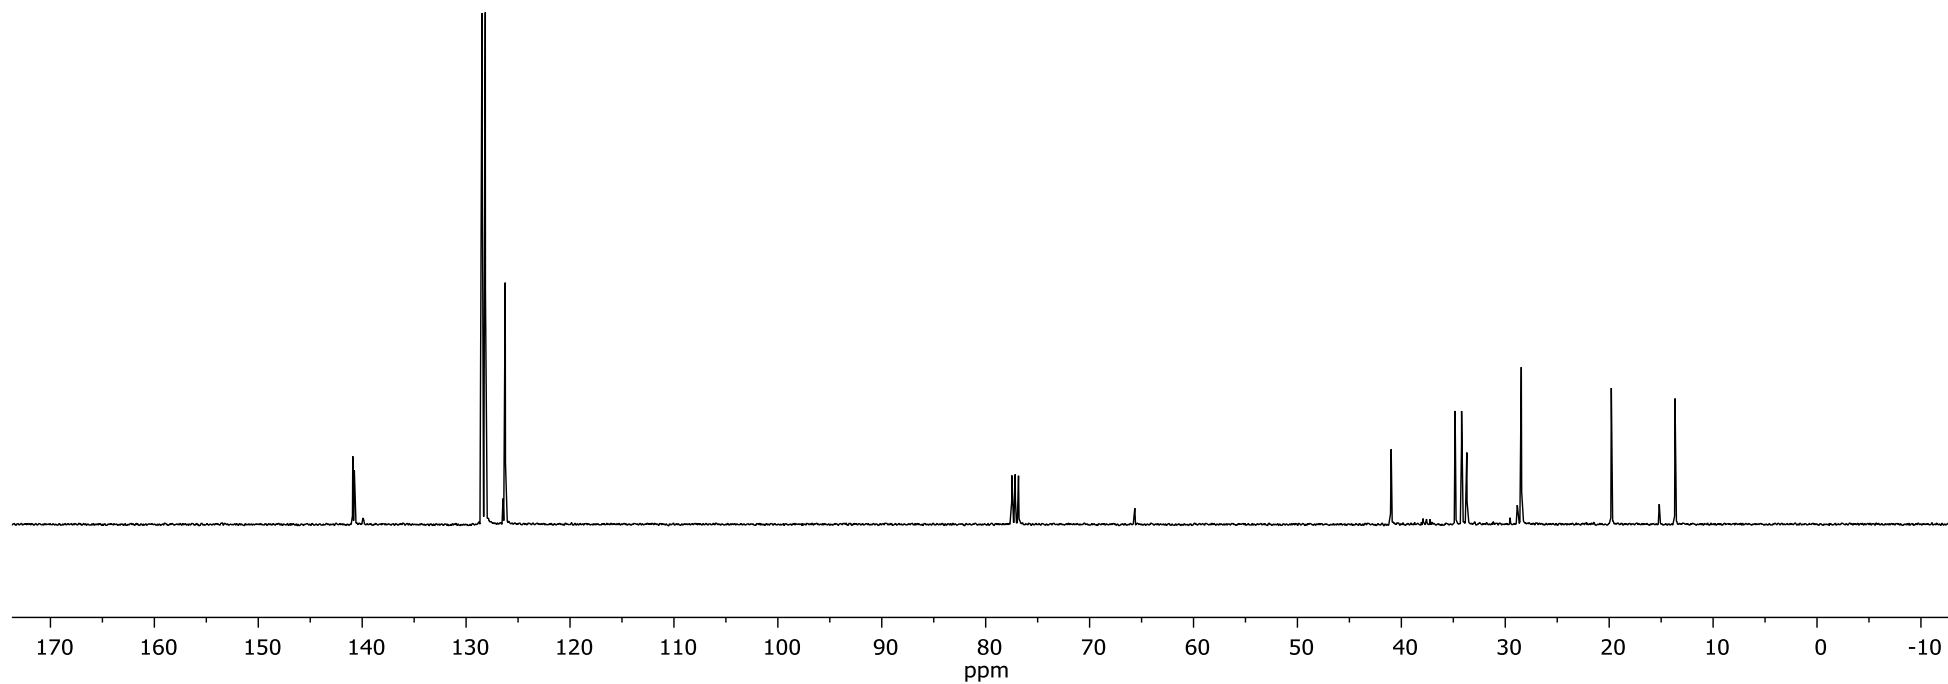

***N*-butyl-bis(2-phenylethyl)phosphinothioic amide (2a)**

31P\_NMR

— 70.45

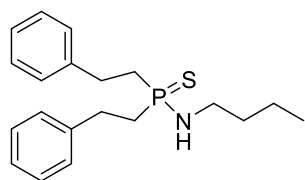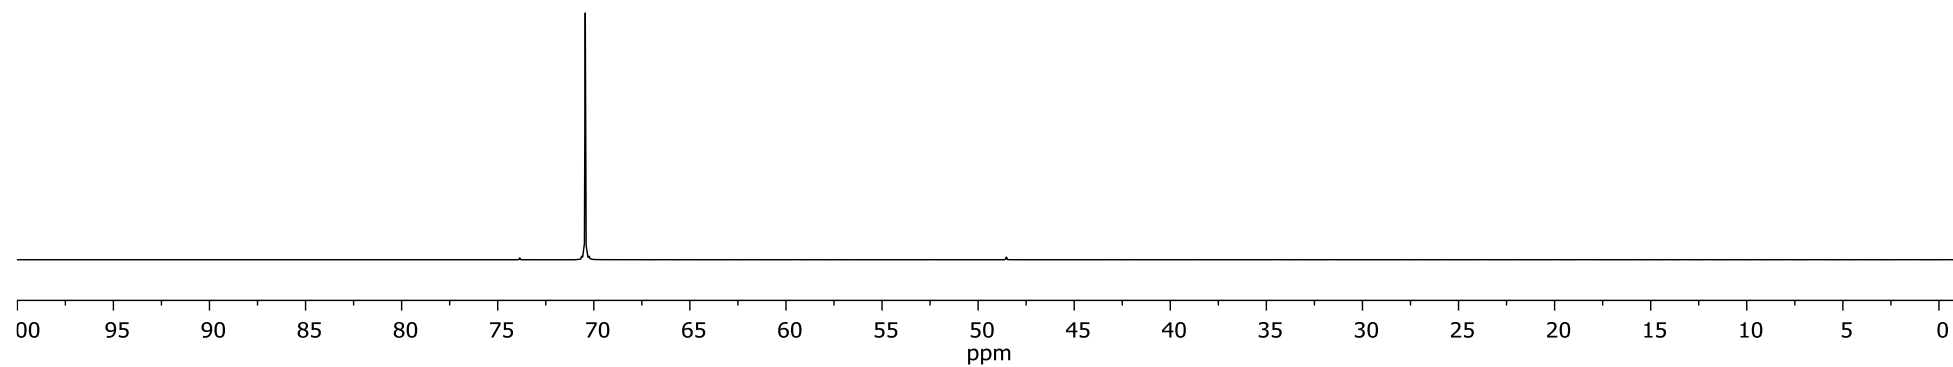



# *N*-butyl-bis(2-phenylethyl)phosphoselenoic amide (2b)

<sup>1</sup>H\_NMR

7.34  
7.31  
7.26 CDCl<sub>3</sub>  
7.24  
7.22

3.09  
3.07  
3.04  
3.03  
3.00  
2.99  
2.98  
2.95  
2.93  
2.86  
2.84  
2.82  
2.80  
2.79  
2.43  
2.42  
2.39  
2.37  
2.35  
2.34  
2.30  
2.29  
2.28  
2.27  
2.25  
2.24  
2.23  
2.22  
1.95  
1.47  
1.46  
1.44  
1.42  
1.40  
1.38  
1.36  
1.34  
1.32  
1.31  
1.29  
0.95  
0.93  
0.92

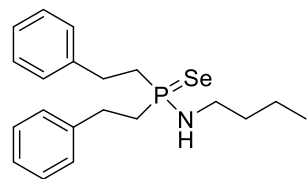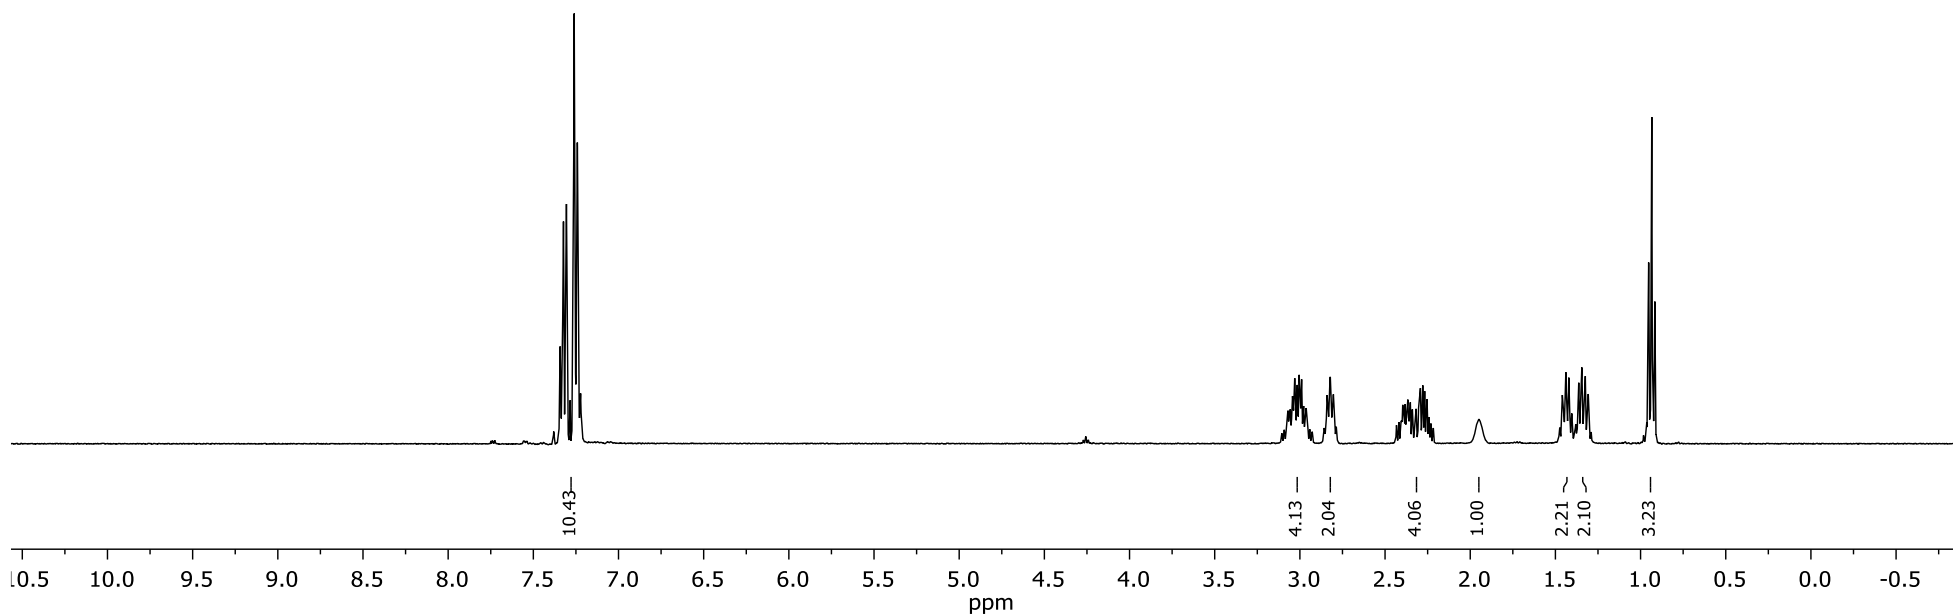

***N*-butyl-bis(2-phenylethyl)phosphinoselenoic amide (2b)**

<sup>13</sup>C\_NMR

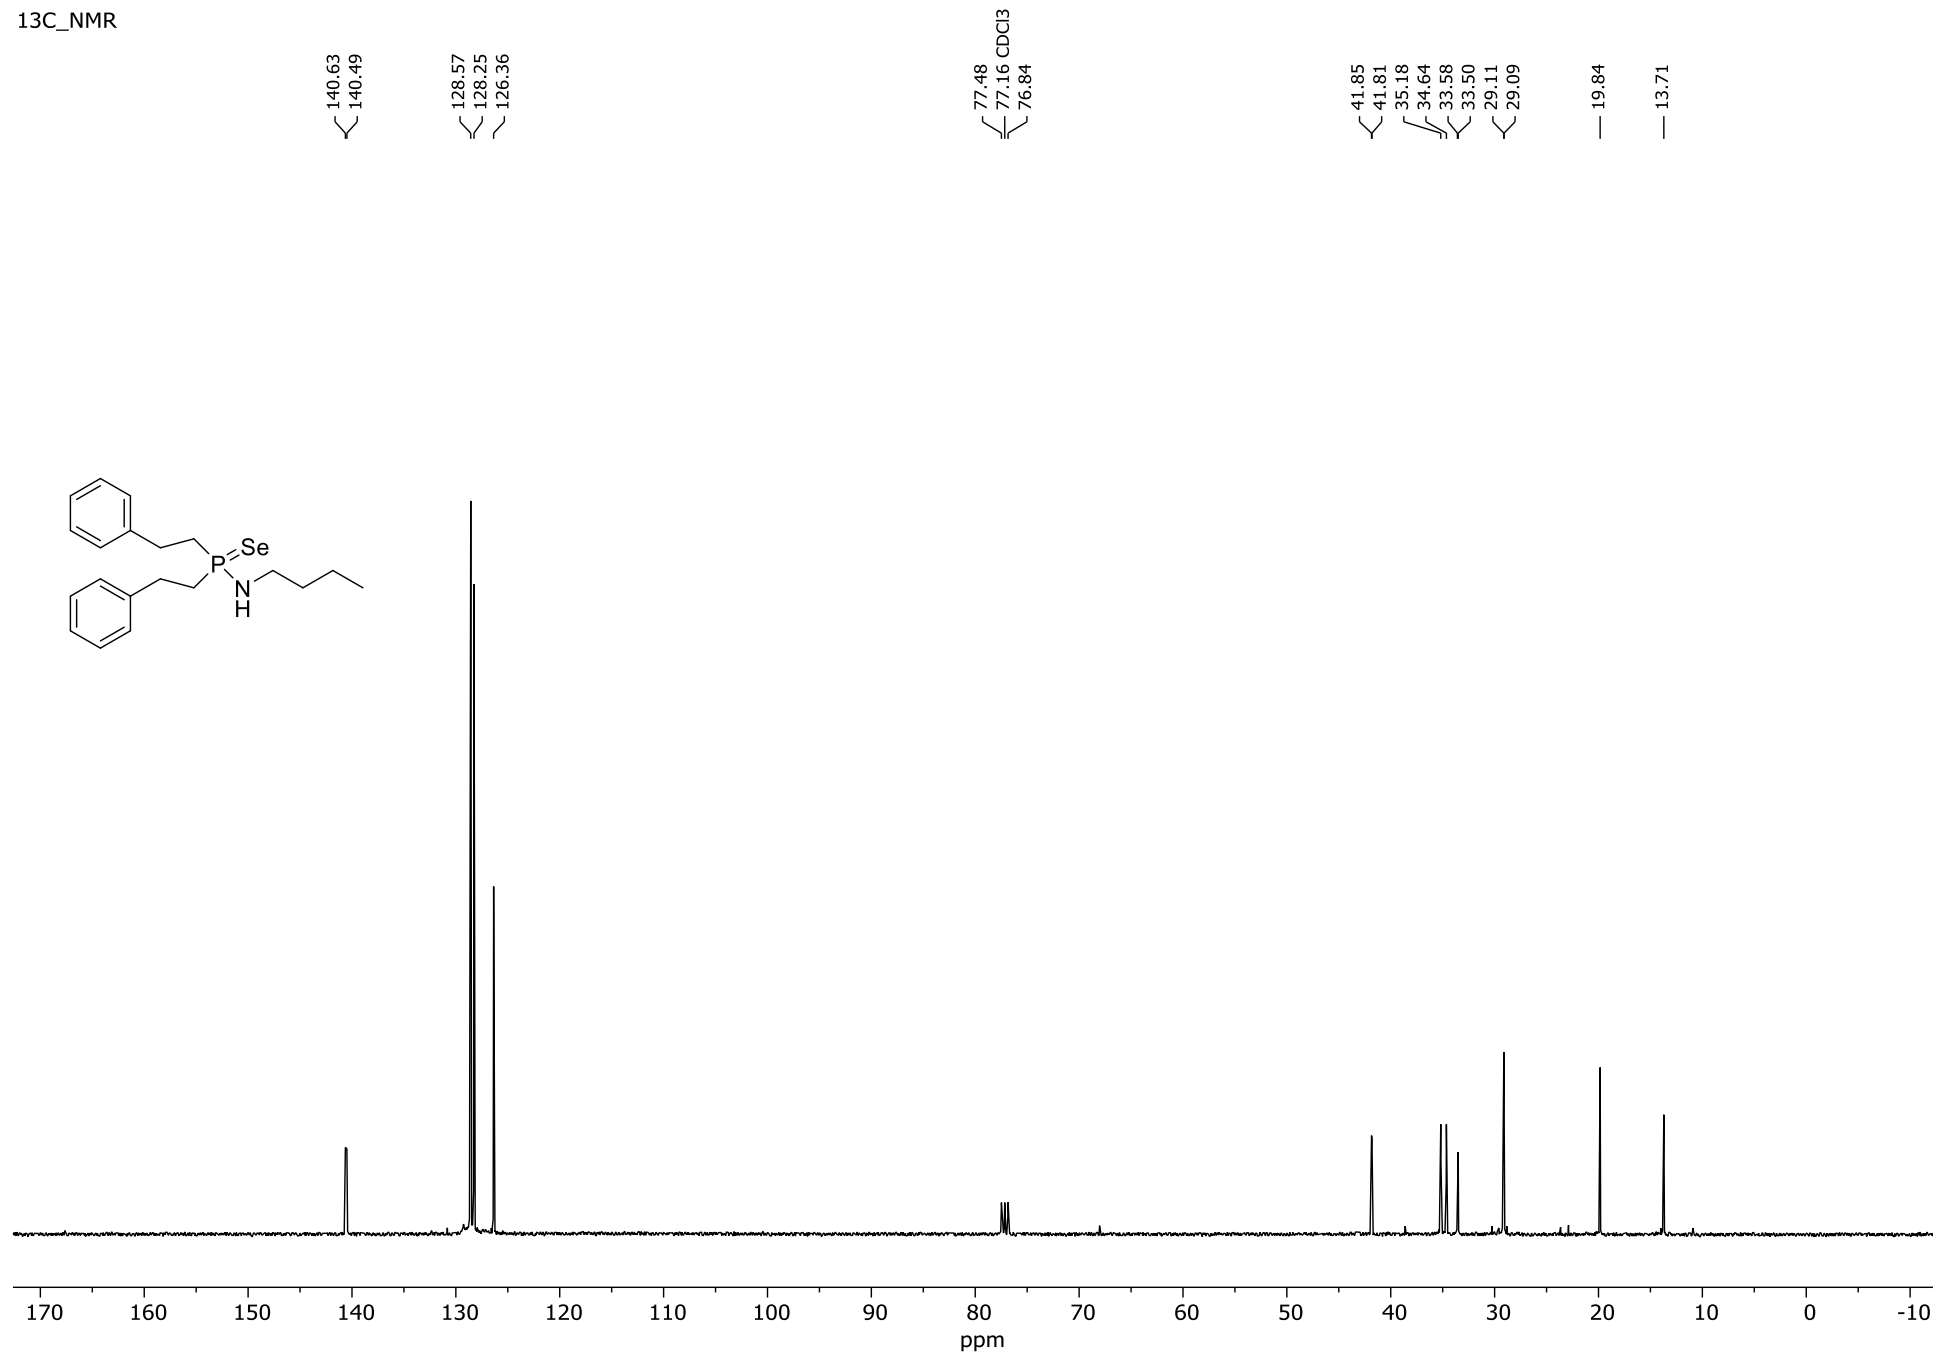

***N*-butyl-bis(2-phenylethyl)phosphinoselenoic amide (2b)**

31P\_NMR

66.39  
64.15  
61.92

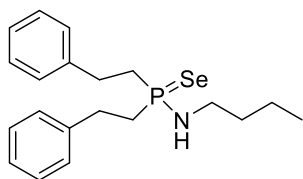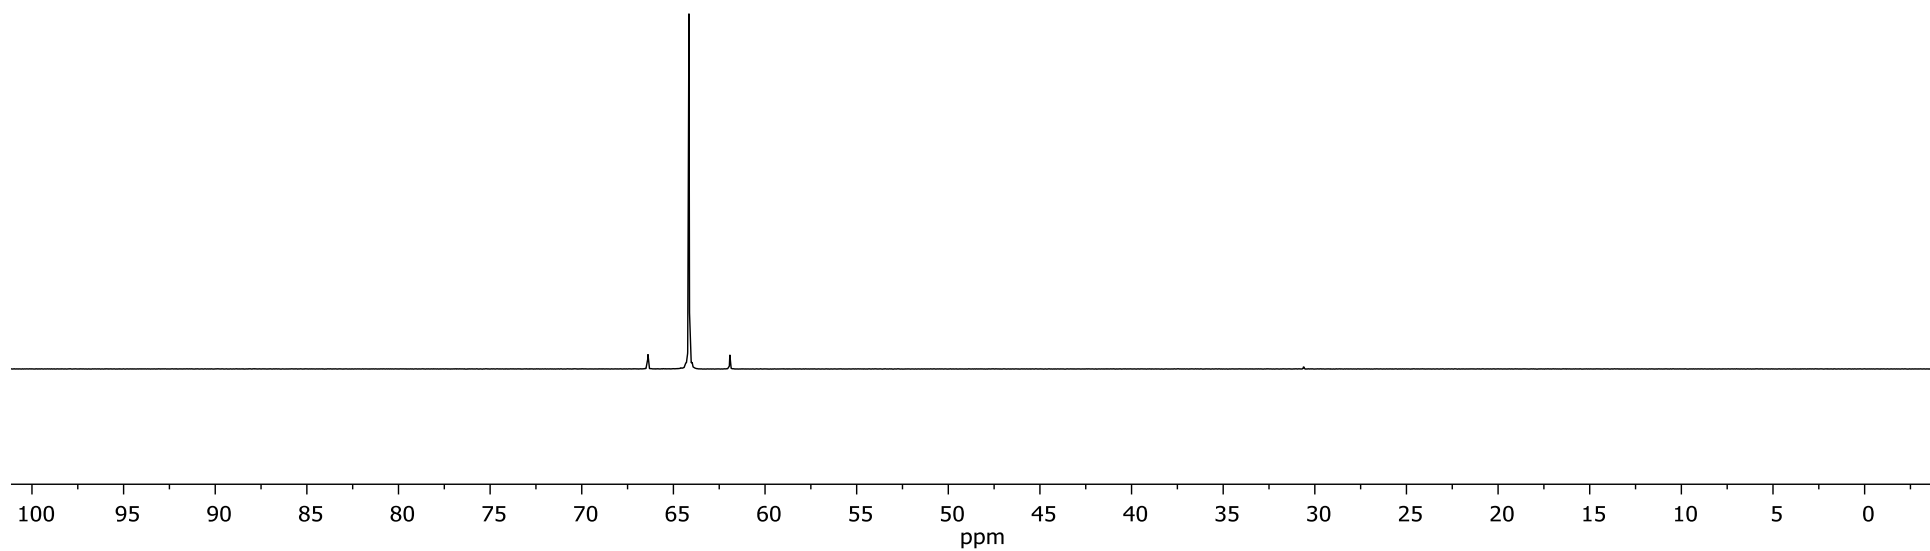

***N*-(2-hydroxyethyl)-bis(2-phenylethyl)phosphinothioic amide (4a)**

<sup>1</sup>H\_NMR

7.32  
7.30  
7.28  
7.26  
7.26 CDCl<sub>3</sub>  
7.23  
7.22  
7.20

3.64  
3.62  
3.61  
3.06  
3.04  
3.03  
3.01  
3.00  
2.98  
2.97  
2.96  
2.94  
2.93  
2.41  
2.25  
2.24  
2.22  
2.21  
2.20  
2.18  
2.17

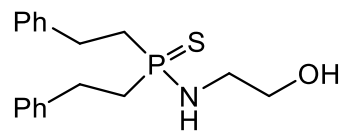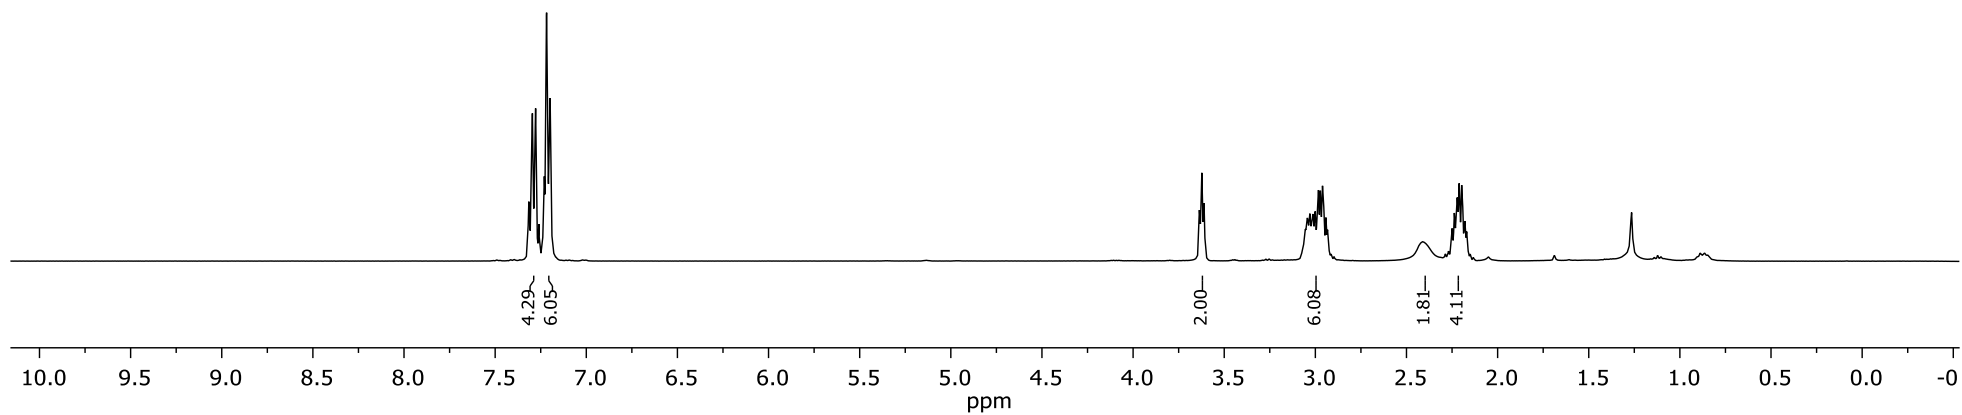

***N*-(2-hydroxyethyl)-bis(2-phenylethyl)phosphinothioic amide (4a)**

<sup>13</sup>C\_NMR

140.90  
140.76

128.79  
128.41  
126.58

77.48  
77.16 CDCl<sub>3</sub>  
76.84

63.02  
62.96

43.55  
43.52

35.57  
34.94

28.81  
28.78

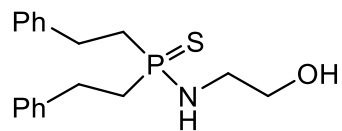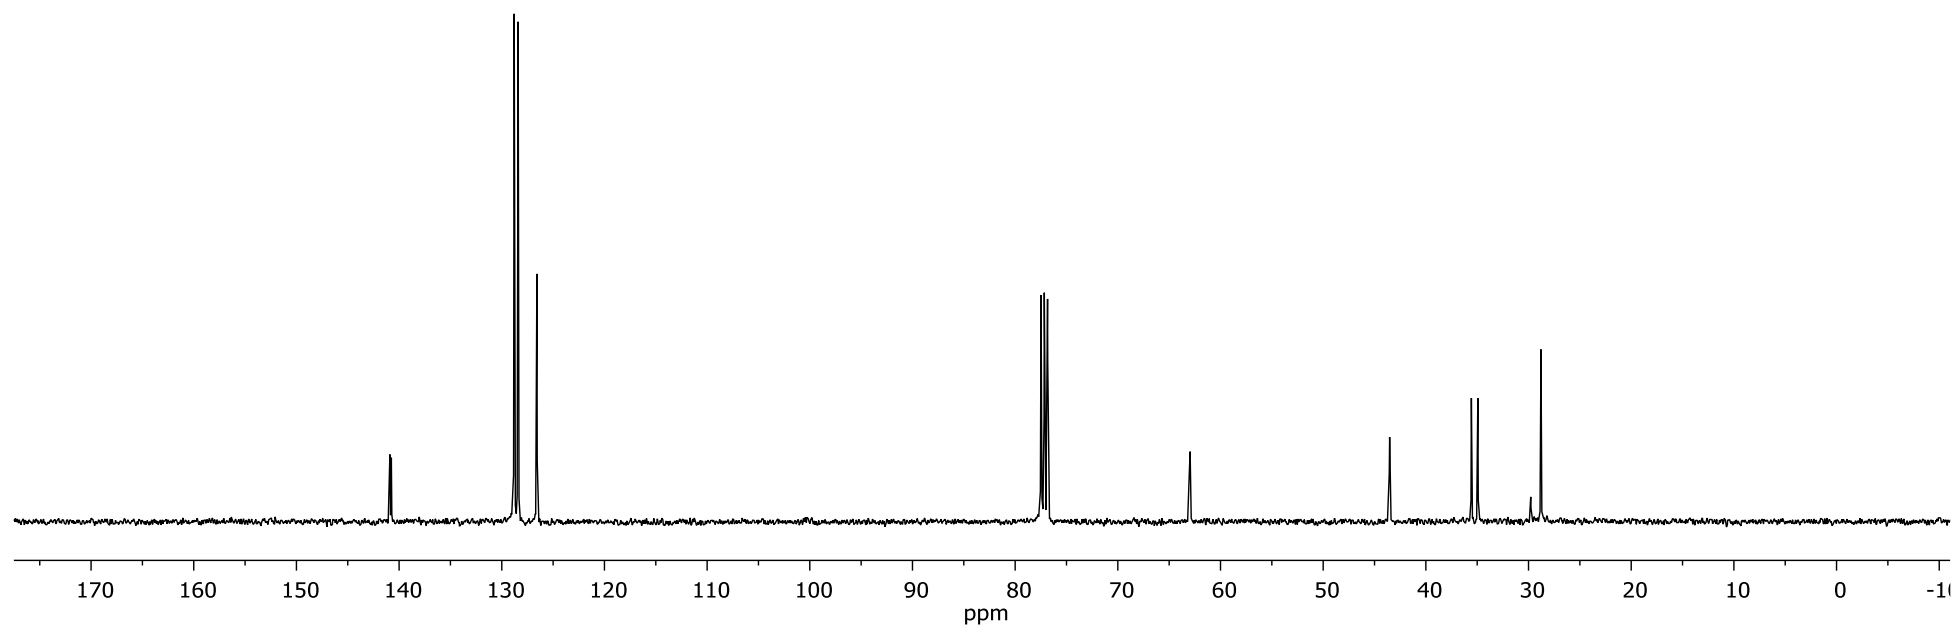

***N*-(2-hydroxyethyl)-bis(2-phenylethyl)phosphinothioic amide (4a)**

31P\_NMR

— 72.01

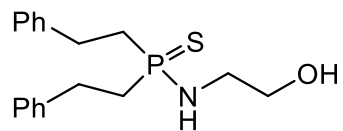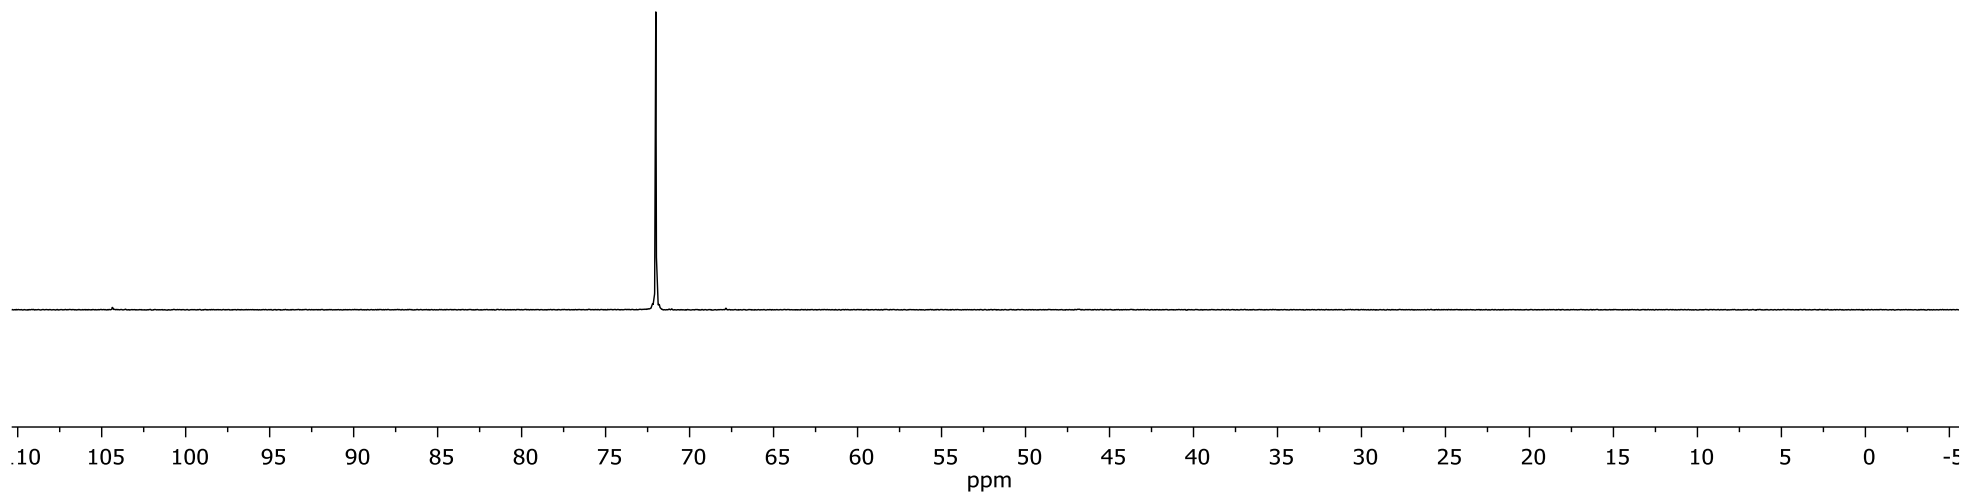

***N*-(3-hydroxypropyl)-bis(2-phenylethyl)phosphinothioic amide (4b)**

<sup>1</sup>H\_NMR

7.36  
7.34  
7.32  
7.30  
7.27  
7.26  
7.26 CDCl<sub>3</sub>  
7.24

3.76  
3.74  
3.73  
3.09  
3.08  
3.07  
3.05  
3.03  
3.01  
3.00  
2.99  
2.96  
2.41  
2.31  
2.30  
2.28  
2.26  
2.25  
2.24  
2.22  
2.21  
2.18  
1.72  
1.70  
1.69  
1.67  
1.66

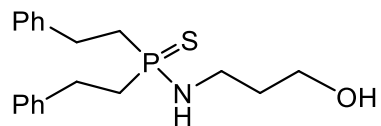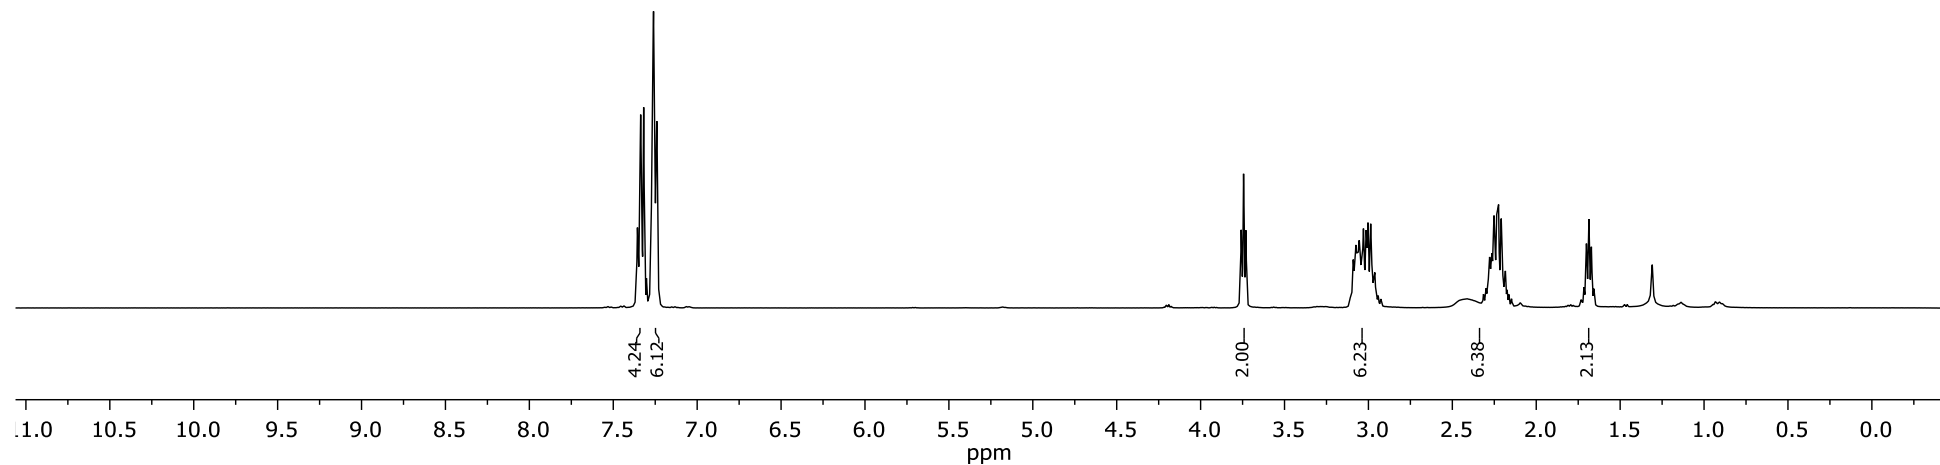

***N*-(3-hydroxypropyl)-bis(2-phenylethyl)phosphinothioic amide (4b)**

<sup>13</sup>C\_NMR

140.92  
140.78

128.74  
128.35  
126.51

77.48  
77.16 CDCl<sub>3</sub>  
76.84

— 59.87

38.24  
35.38  
34.75  
33.86  
33.79  
28.74  
28.71

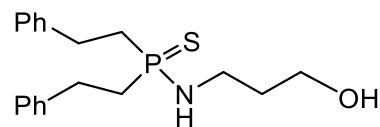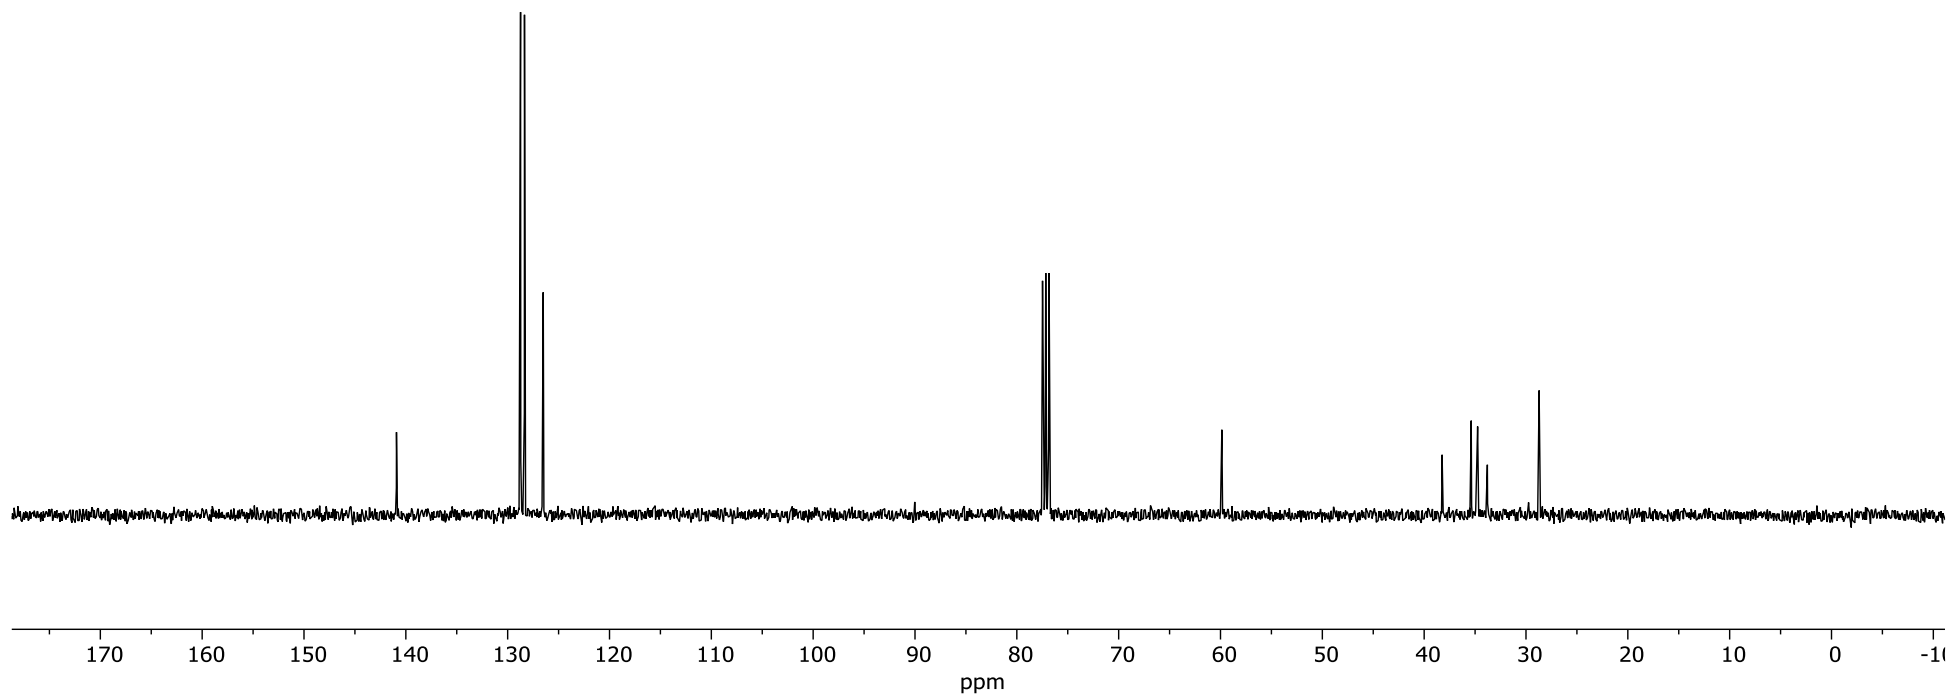



***N*-(3-hydroxypropyl)-bis(2-phenylethyl)phosphinothioic amide (4b)**

31P\_NMR

71.25

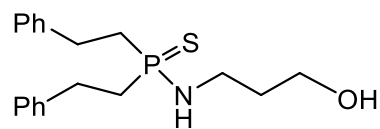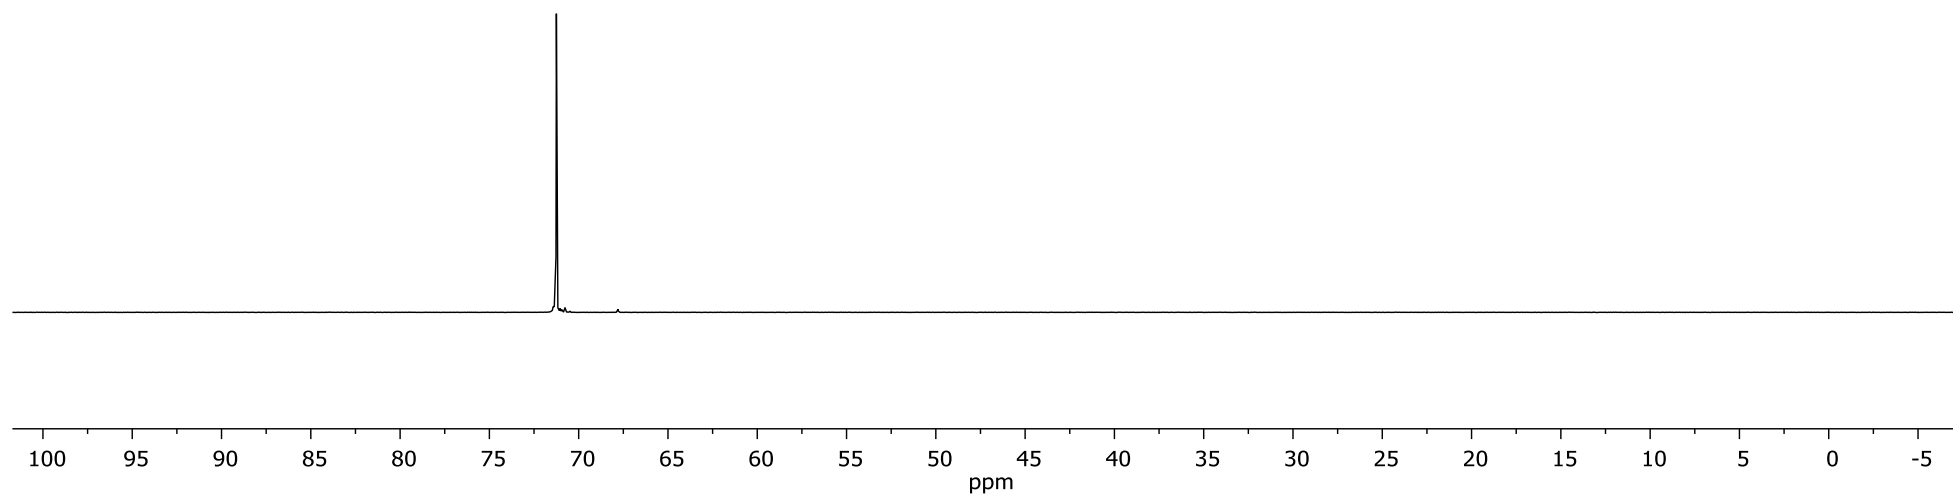

***N*-(2-hydroxyethyl)-bis[2-(4-chlorophenyl)ethyl]phosphinothioic amide (4c)**

1H\_NMR

7.28 CDCl<sub>3</sub>  
7.26  
7.15  
7.13

3.70  
3.69  
3.68  
3.11  
3.10  
3.08  
3.07  
3.06  
3.00  
2.99  
2.98  
2.97  
2.96  
2.94  
2.93  
2.92  
2.90  
2.90  
2.89  
2.88  
2.23  
2.22  
2.21  
2.20  
2.20  
2.19  
2.18  
2.17  
2.16  
2.15  
2.14  
2.13

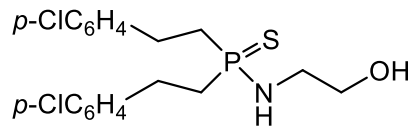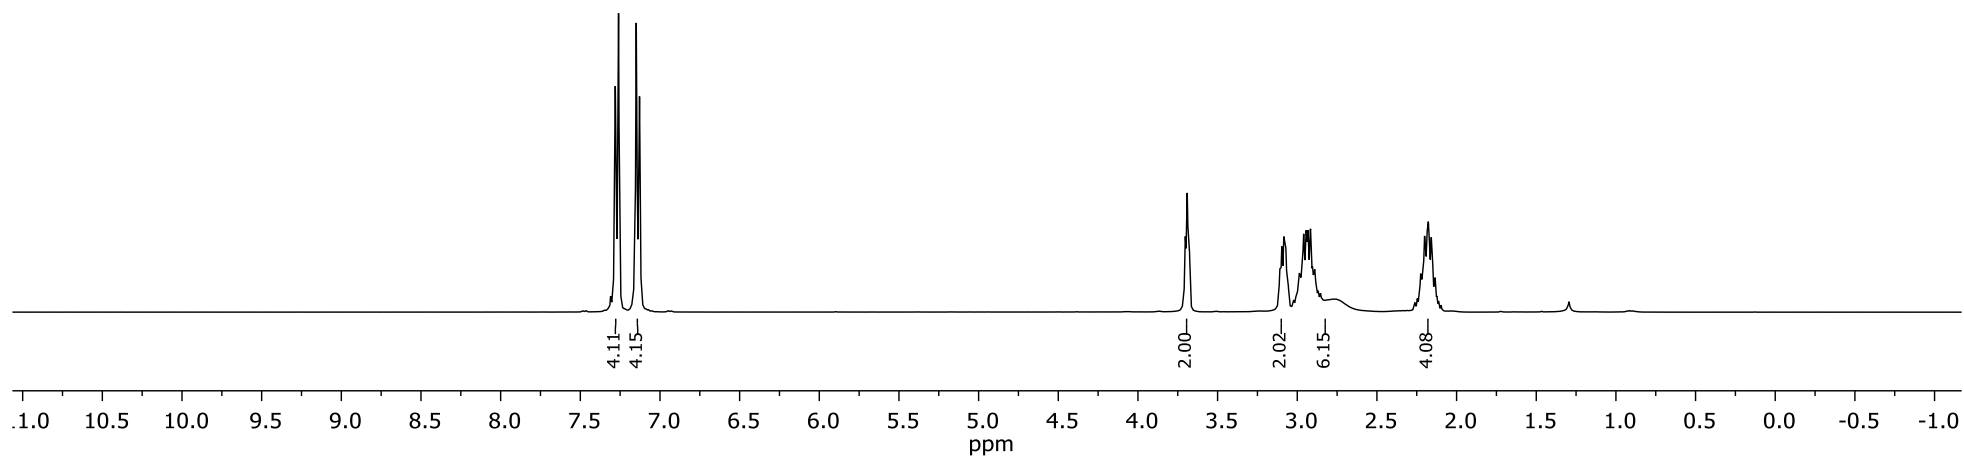

***N*-(2-hydroxyethyl)-bis[2-(4-chlorophenyl)ethyl]phosphinothioic amide (4c)**

<sup>13</sup>C-NMR

139.14  
138.99

132.22  
129.65  
128.77

77.48  
77.16 CDCl<sub>3</sub>  
76.84

62.77  
62.70

43.43  
43.41

35.20  
34.57

28.05  
28.02

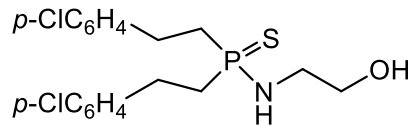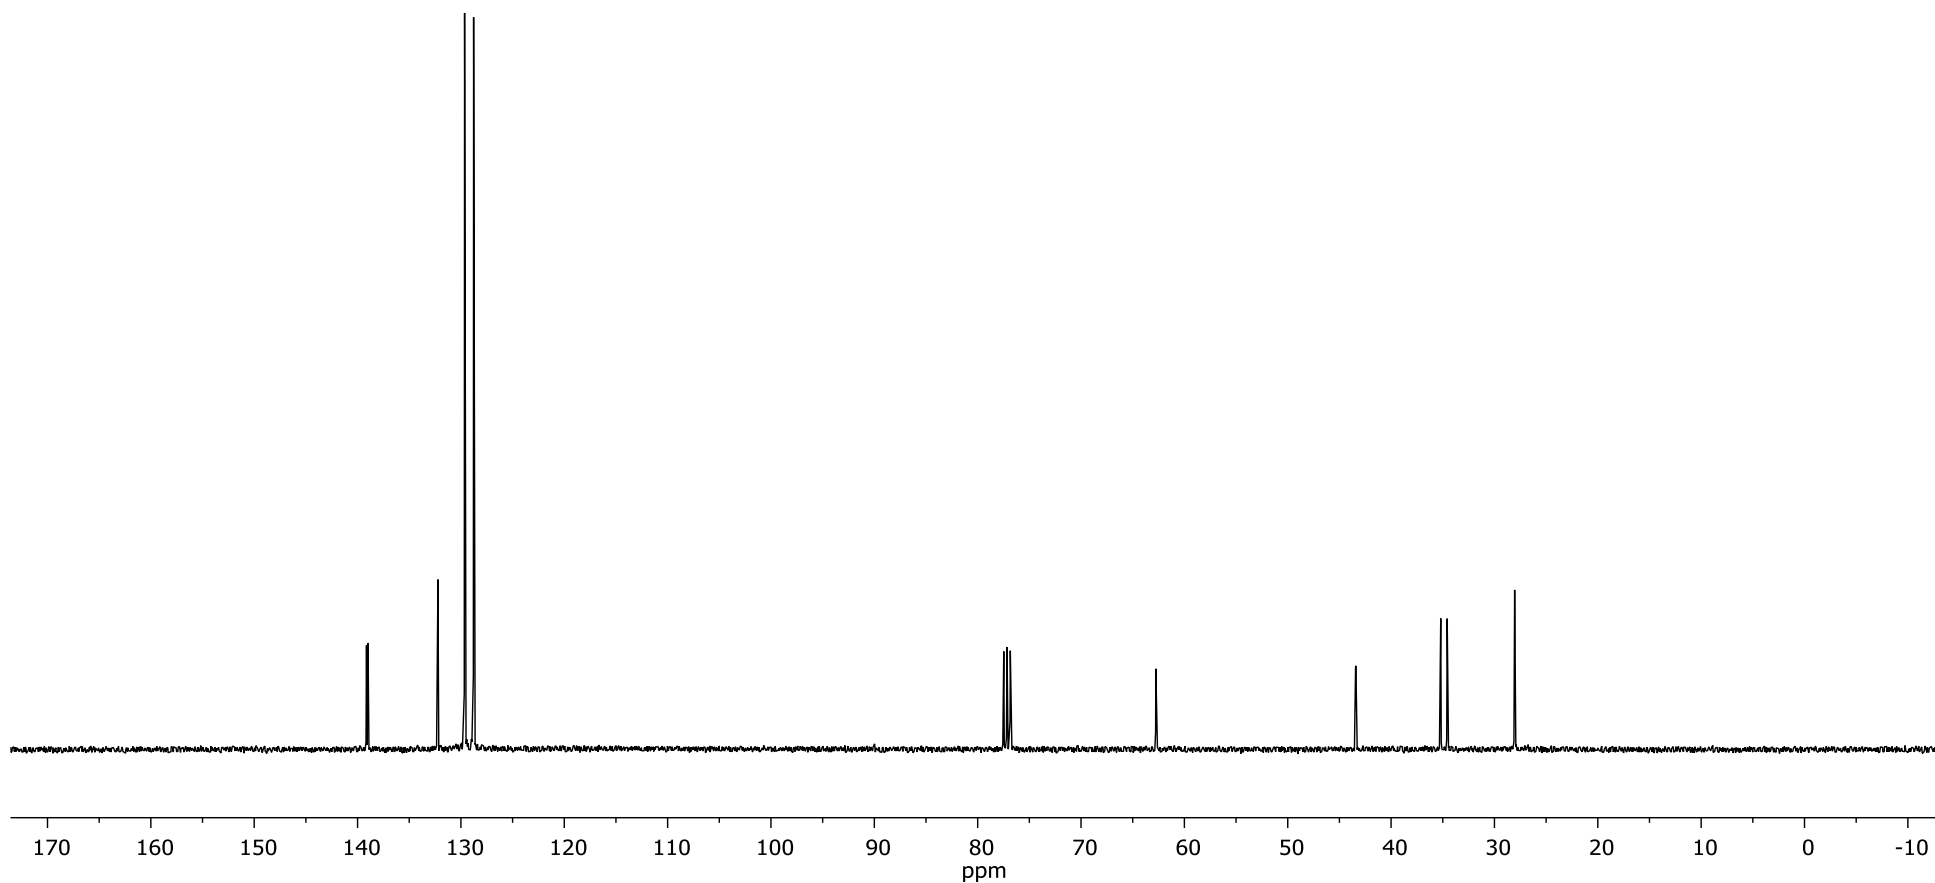

***N*-(2-hydroxyethyl)-bis[2-(4-chlorophenyl)ethyl]phosphinothioic amide (4c)**

31P\_NMR

— 71.45

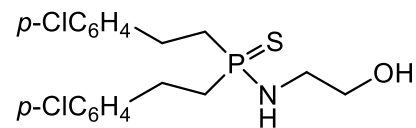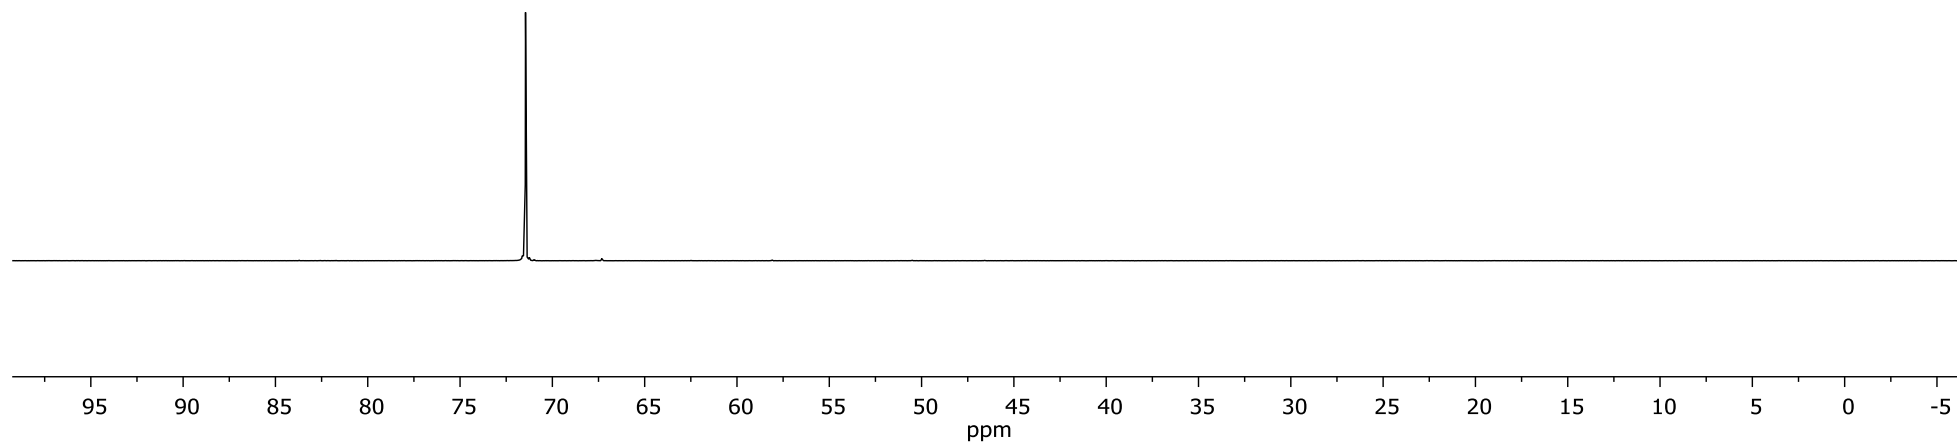

***N*-(3-hydroxypropyl)-bis[2-(4-chlorophenyl)ethyl]phosphinothioic amide (4d)**

1H\_NMR

7.39  
7.37  
7.26 CDCl3  
7.24

3.86  
3.85  
3.84  
3.19  
3.18  
3.16  
3.15  
3.14  
3.11  
3.10  
3.08  
3.06  
3.04  
3.03  
3.02  
2.99  
2.98  
2.97  
2.60  
2.50  
2.33  
2.32  
2.31  
2.29  
2.28  
2.27  
2.25  
2.24  
2.23  
2.20  
2.19  
2.18  
1.84  
1.83  
1.82  
1.80  
1.79  
1.77

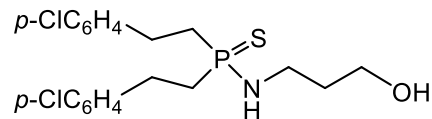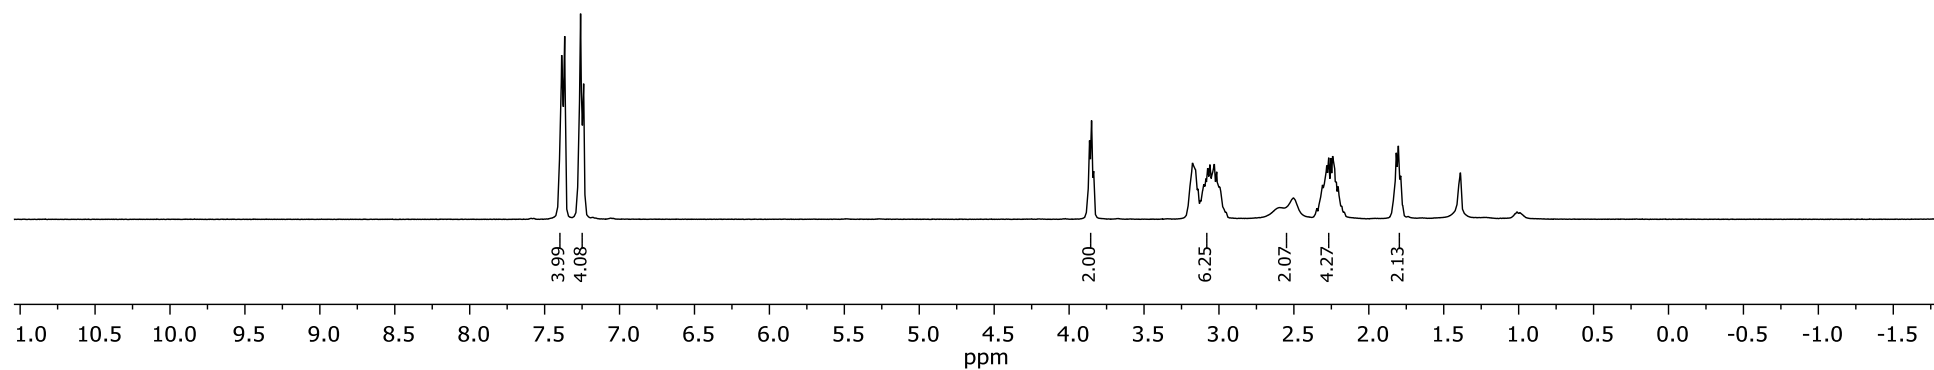

***N*-(3-hydroxypropyl)-bis[2-(4-chlorophenyl)ethyl]phosphinothioic amide (4d)**

<sup>13</sup>C\_NMR

139.29  
139.14

132.25  
129.69  
128.80

77.48  
77.16 CDCl<sub>3</sub>  
76.84

59.92

38.43  
38.41  
35.19  
34.56  
33.79  
33.73  
28.08  
28.06

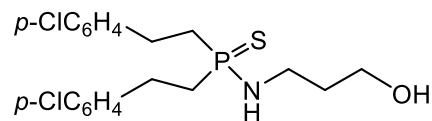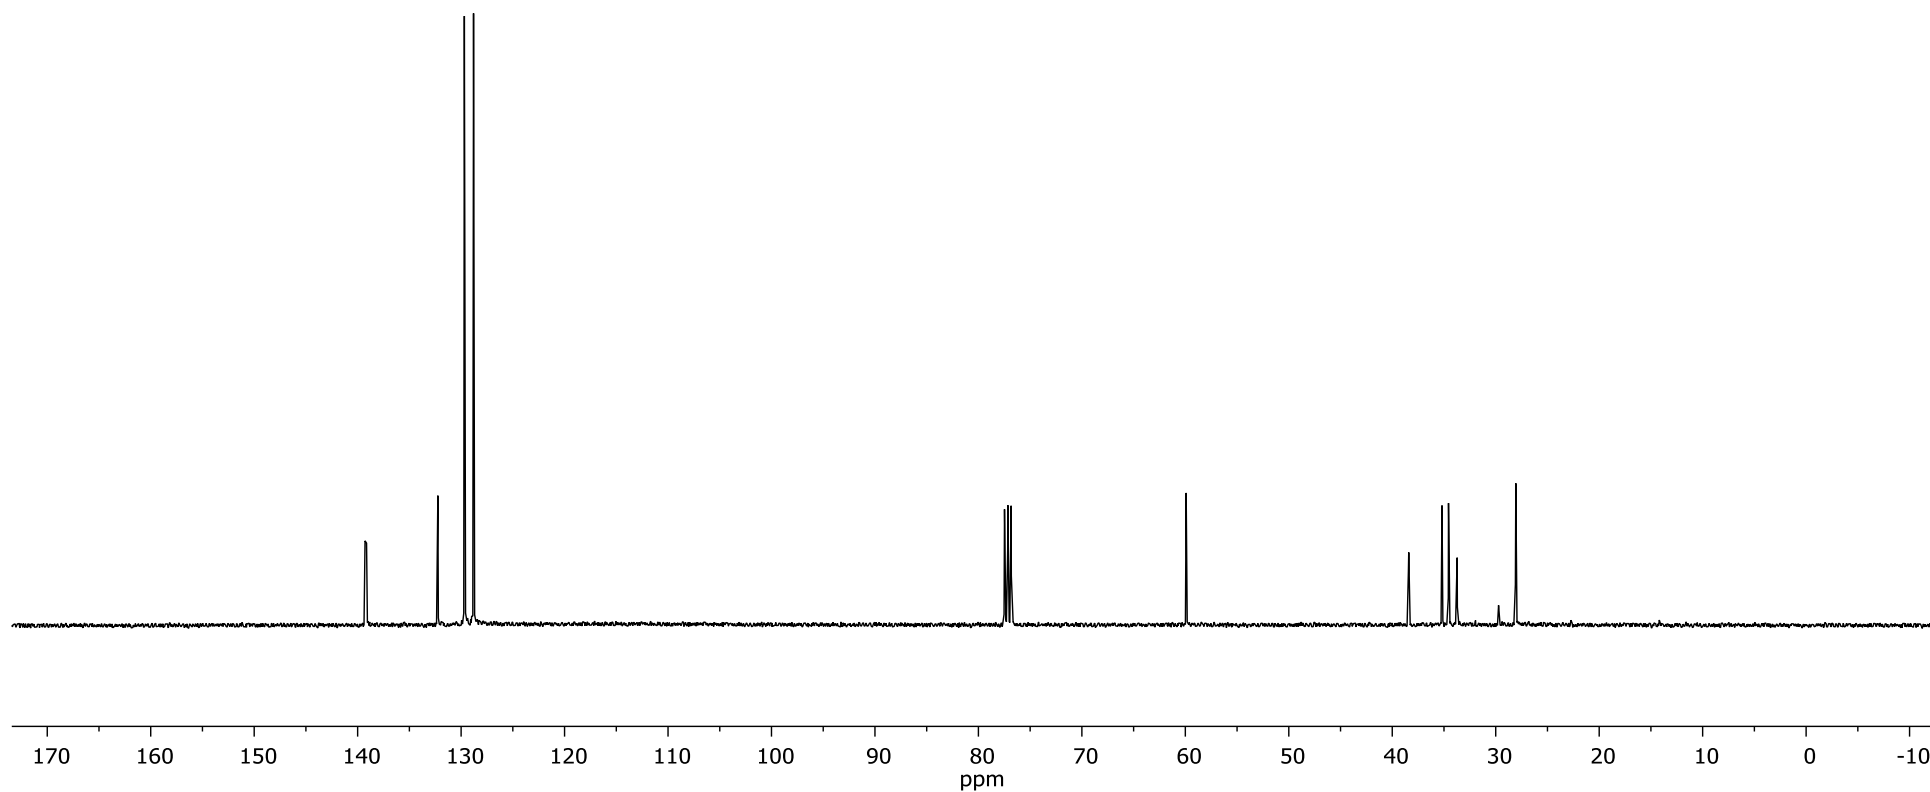

***N*-(3-hydroxypropyl)-bis[2-(4-chlorophenyl)ethyl]phosphinothioic amide (4d)**

31P\_NMR

70.65

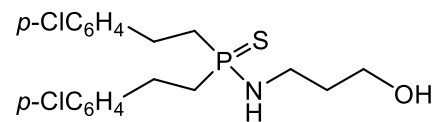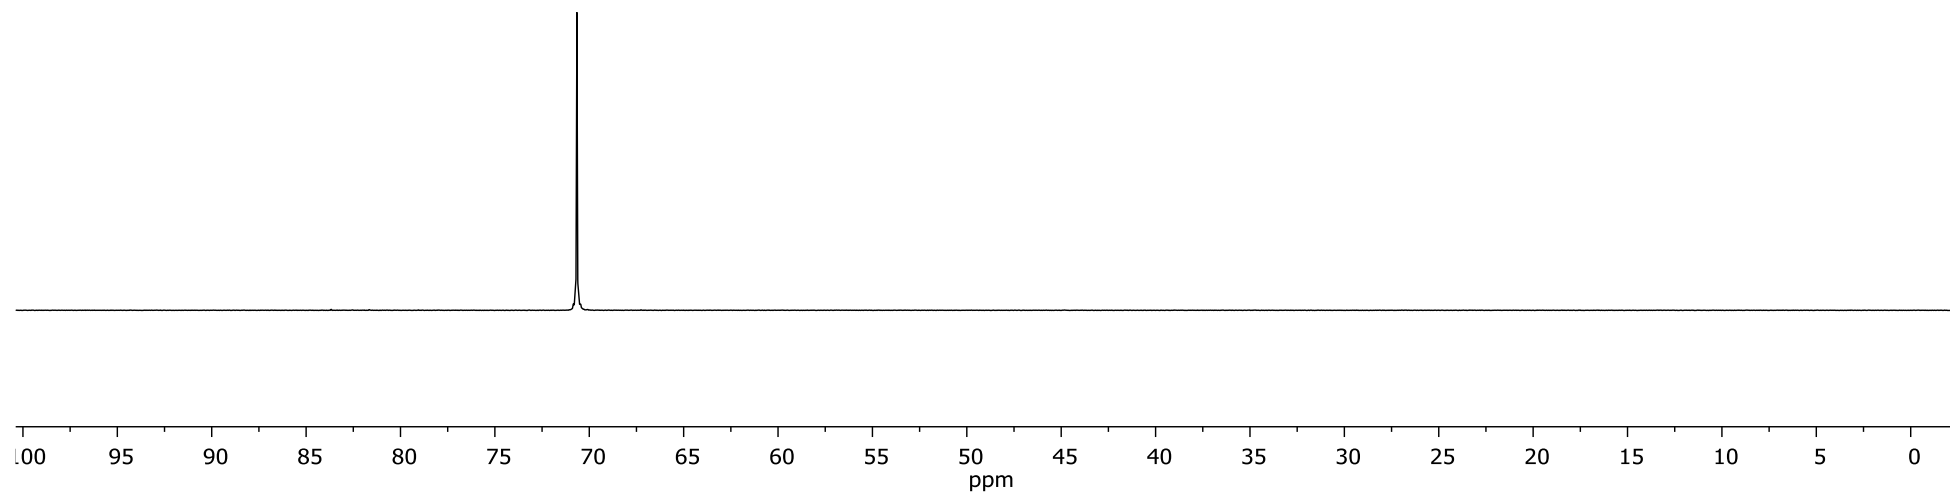

***N*-(2-hydroxyethyl)-bis(2-phenylethyl)phosphinoselenoic amide (4e)**

1H\_NMR

7.30  
7.28  
7.26 CDCl3  
7.26  
7.21  
7.19

3.65  
3.63  
3.62  
3.03  
3.02  
3.01  
2.98  
2.95  
2.93  
2.91  
2.88  
2.68  
2.36  
2.34  
2.33  
2.30  
2.29  
2.28  
2.26

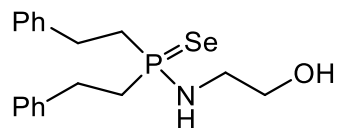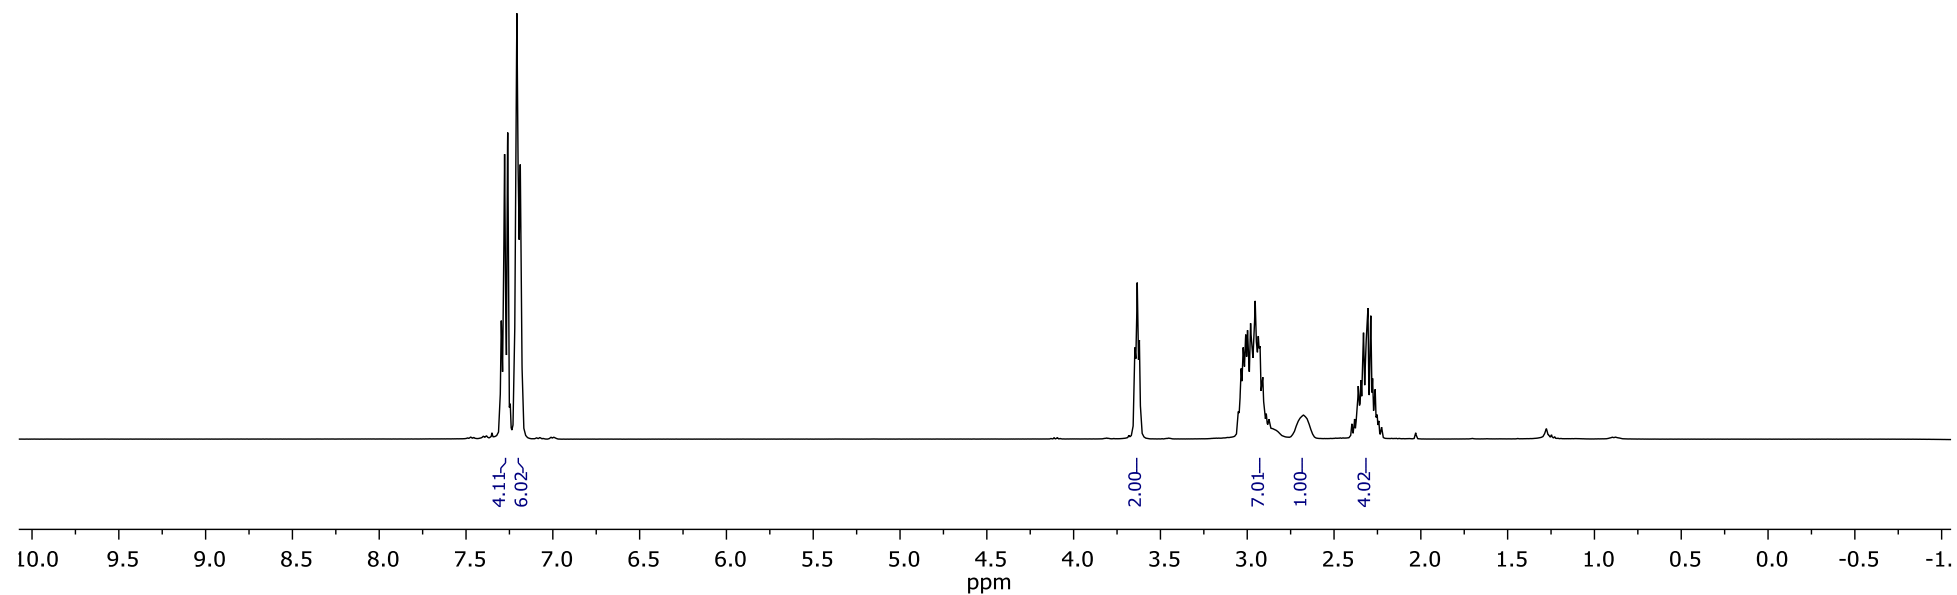



***N*-(2-hydroxyethyl)-bis(2-phenylethyl)phosphinoselenoic amide (4e)**

<sup>13</sup>C\_NMR

140.43  
140.29

128.62  
128.27  
126.44

77.48  
77.16 CDCl<sub>3</sub>  
76.84

62.39  
62.32

44.09  
44.06

35.73  
35.19

29.16  
29.14

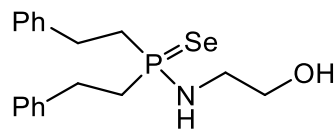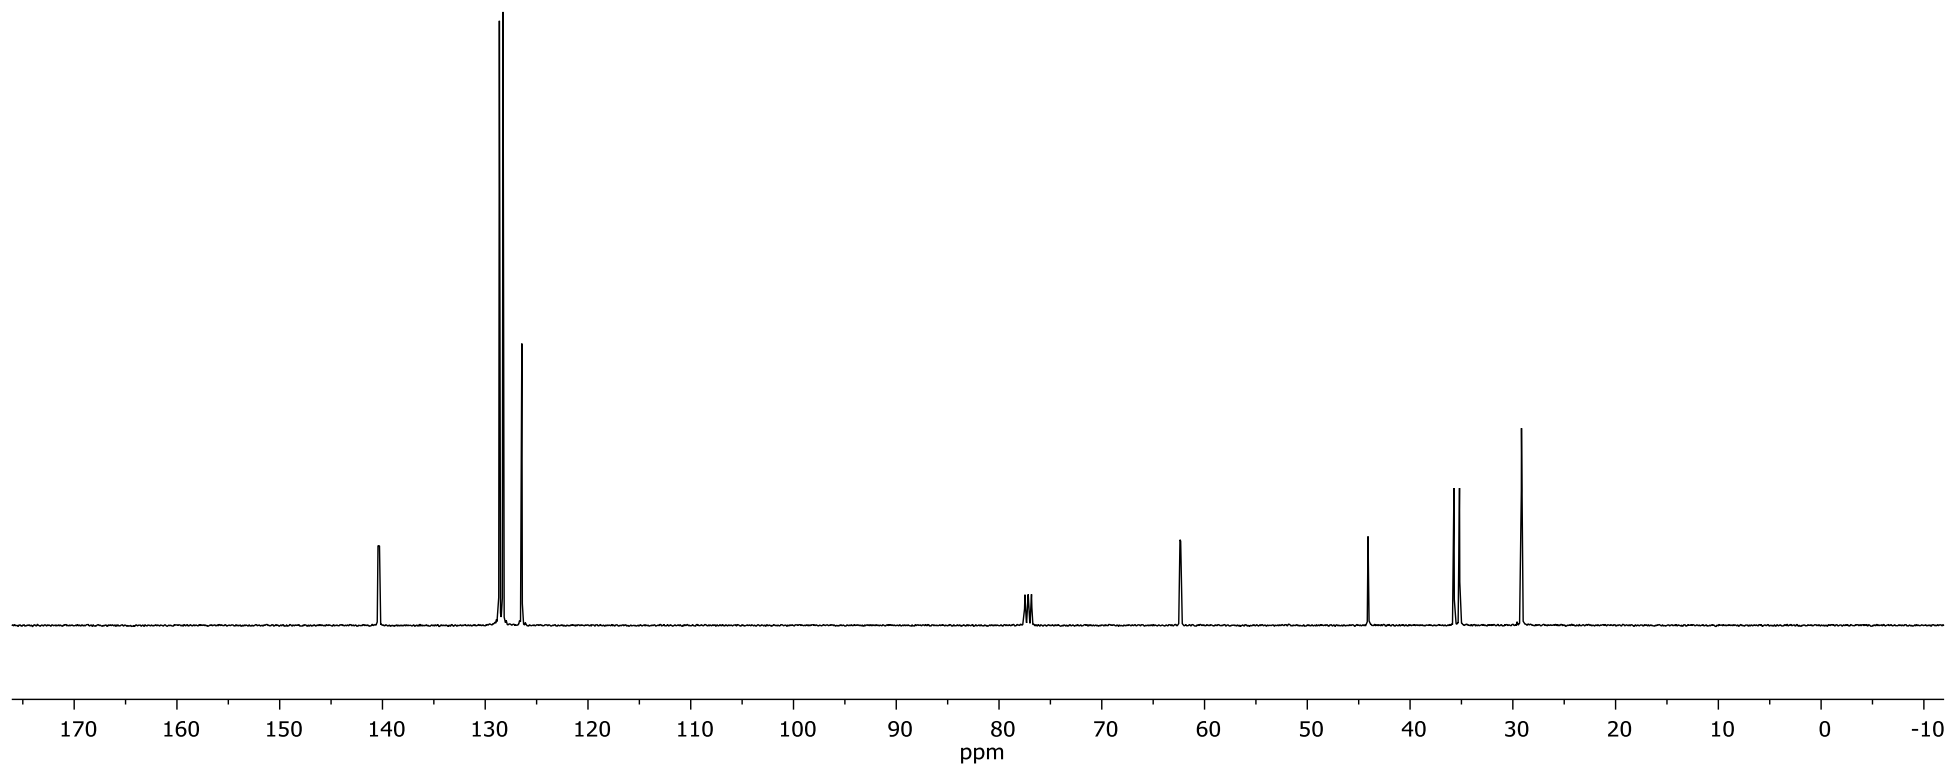

***N*-(2-hydroxyethyl)-bis(2-phenylethyl)phosphinoselenoic amide (4e)**

31P\_NMR

67.98  
65.77  
63.56

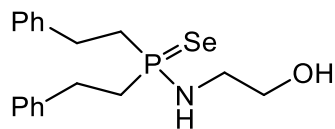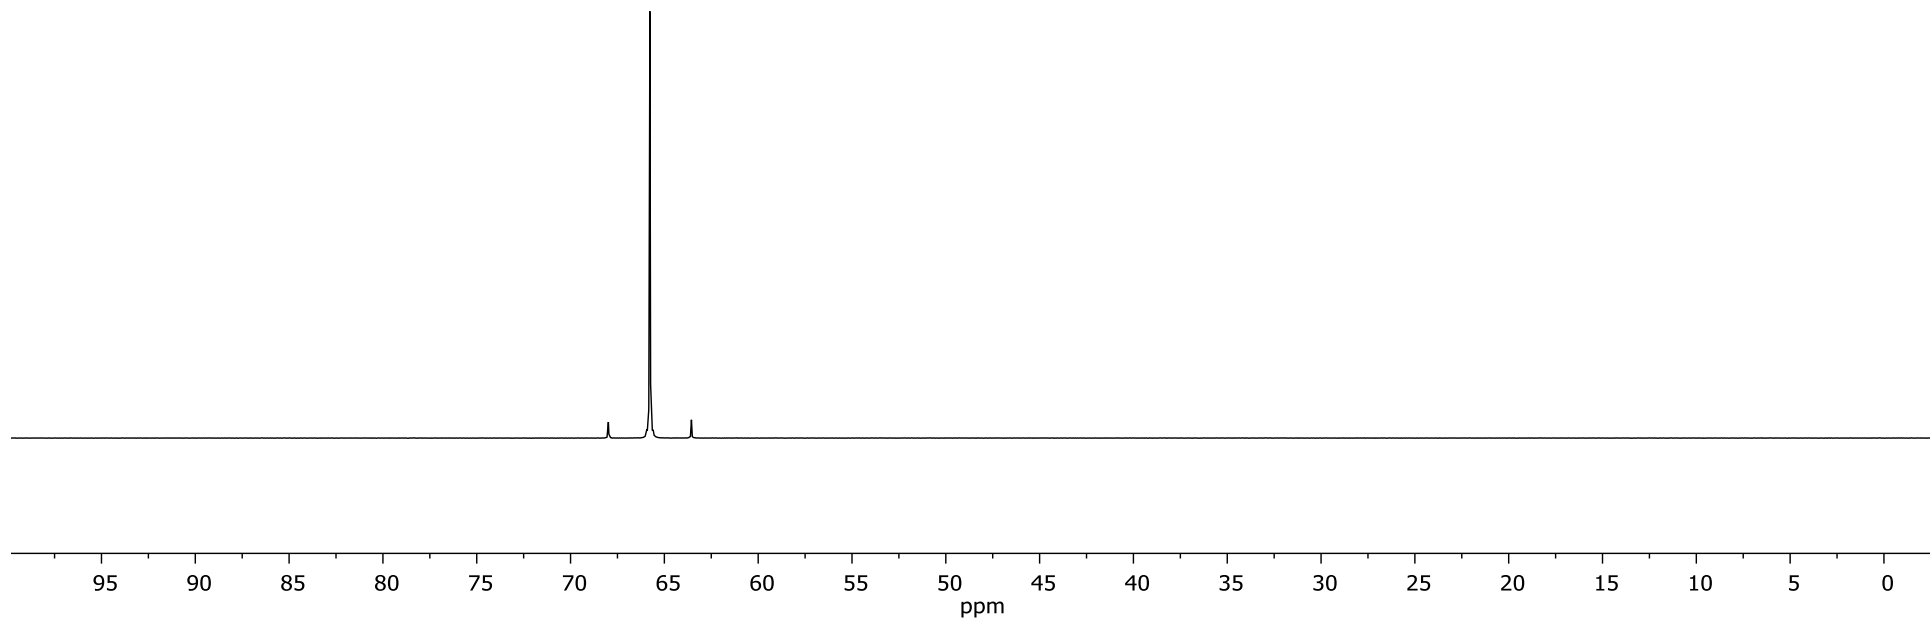

***N*-(3-hydroxypropyl)-bis(2-phenylethyl)phosphinoselenoic amide (4f)**

1H\_NMR

7.35  
7.33  
7.31  
7.29  
7.26 CDCl3  
7.26  
7.24

3.75  
3.73  
3.72  
3.07  
3.05  
3.03  
3.01  
2.99  
2.96  
2.42  
2.38  
2.35  
2.32  
2.29  
2.28  
2.24  
1.71  
1.69  
1.68  
1.66  
1.65

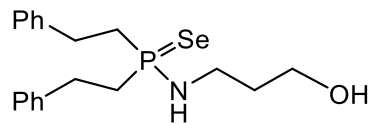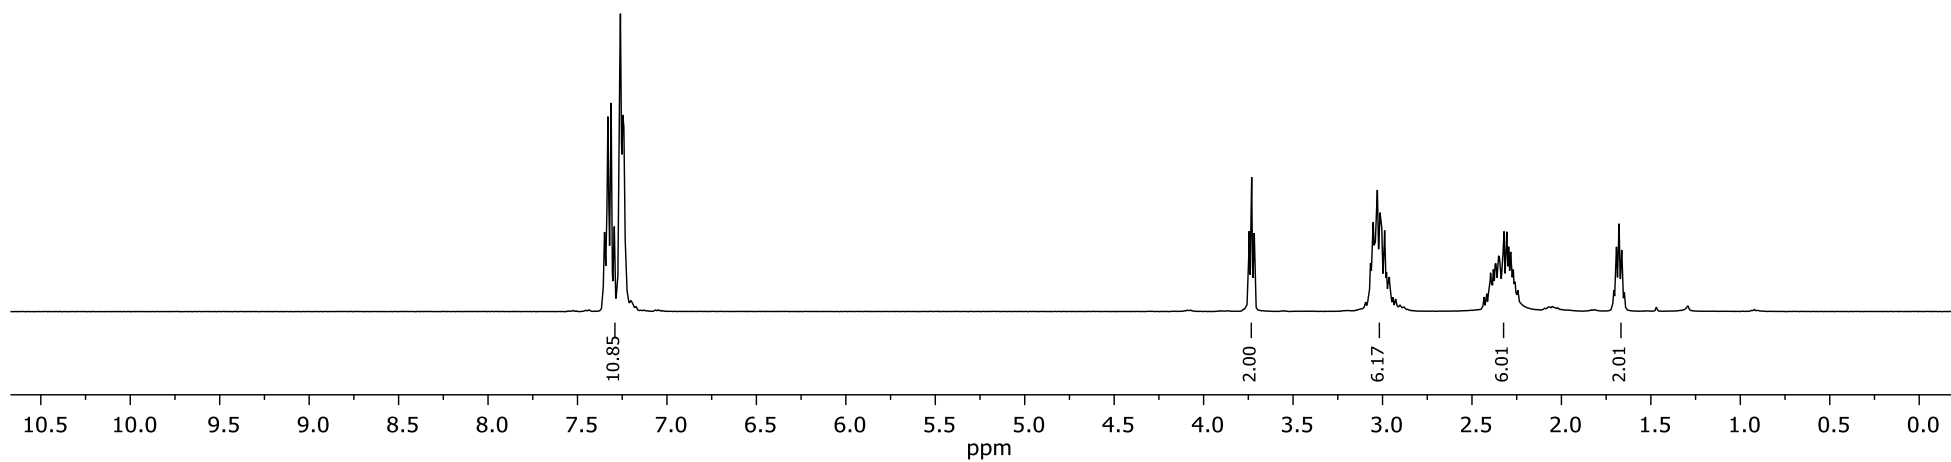

***N*-(3-hydroxypropyl)-bis(2-phenylethyl)phosphinoselenoic amide (4f)**

<sup>13</sup>C\_NMR

140.64  
140.49

128.75  
128.40  
126.56

77.48  
77.16 CDCl<sub>3</sub>  
76.84

— 59.90

39.24  
39.21  
35.79  
35.24  
33.63  
33.57  
29.30  
29.28

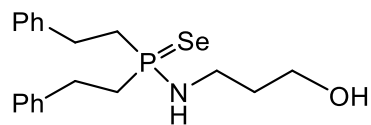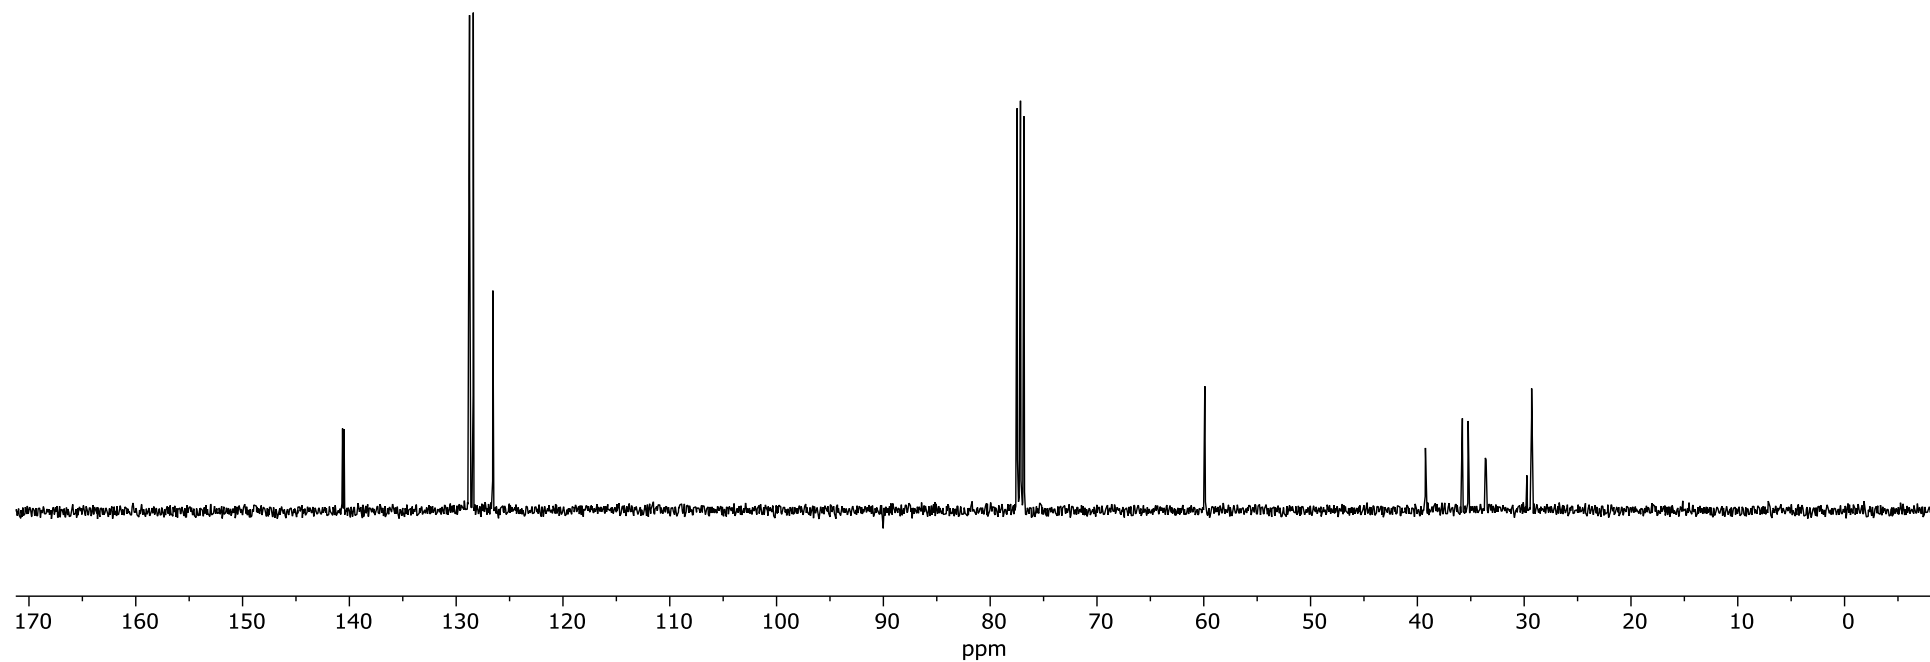

***N*-(3-hydroxypropyl)-bis(2-phenylethyl)phosphinoselenoic amide (4f)**

31P\_NMR

— 65.17

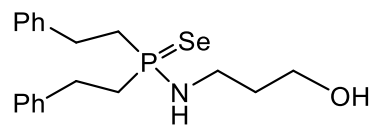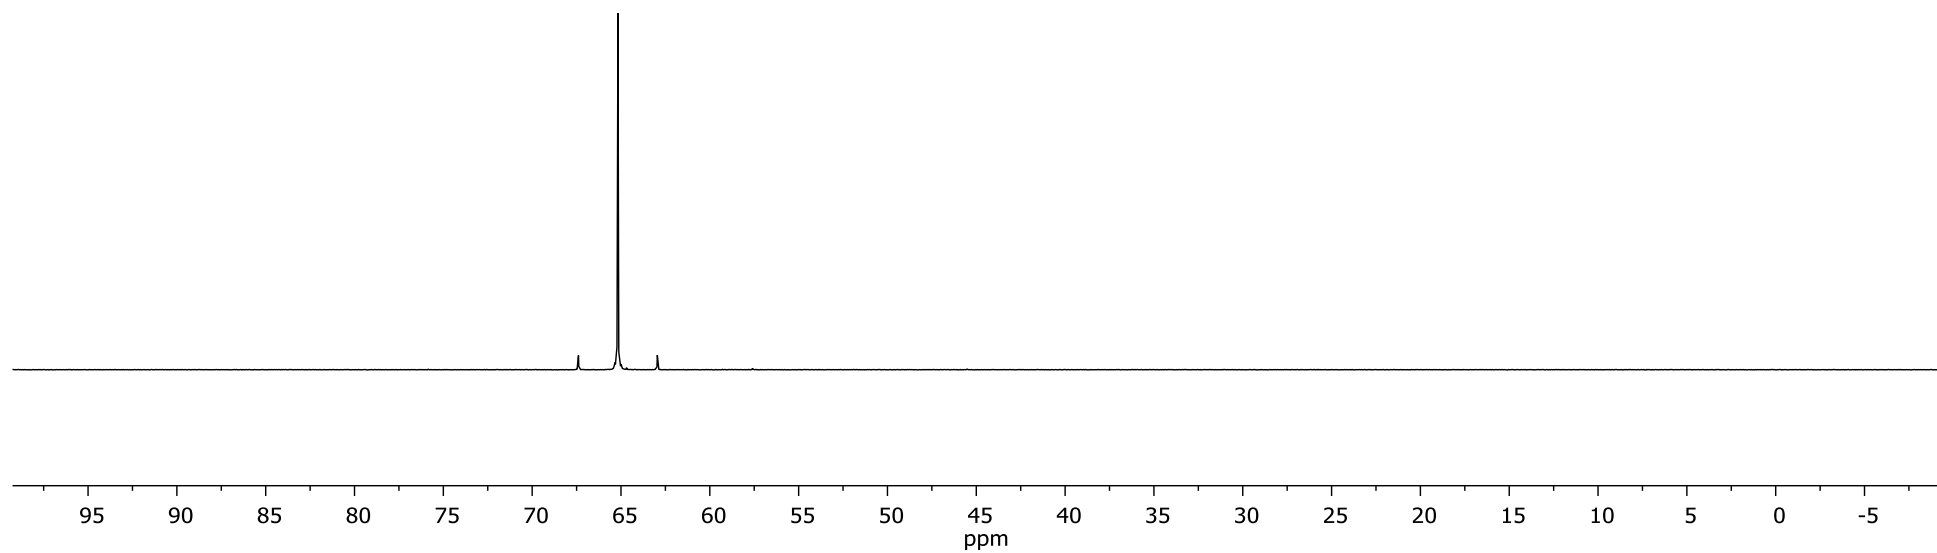

***O*-[2-(benzylamino)ethyl]-bis(2-phenylethyl)phosphinothioate (9a)**

<sup>1</sup>H\_NMR

7.34  
7.32  
7.30  
7.28  
7.26 CDCl<sub>3</sub>  
7.24  
7.22  
7.20  
7.18

4.13  
4.12  
4.11  
4.10  
4.09  
3.84  
3.02  
3.00  
2.99  
2.97  
2.95  
2.94  
2.93  
2.87  
2.86  
2.84  
2.31  
2.29  
2.28  
2.25  
2.23  
2.21  
2.17

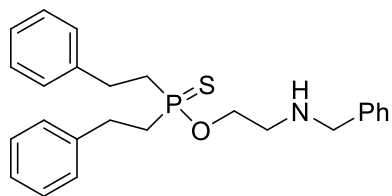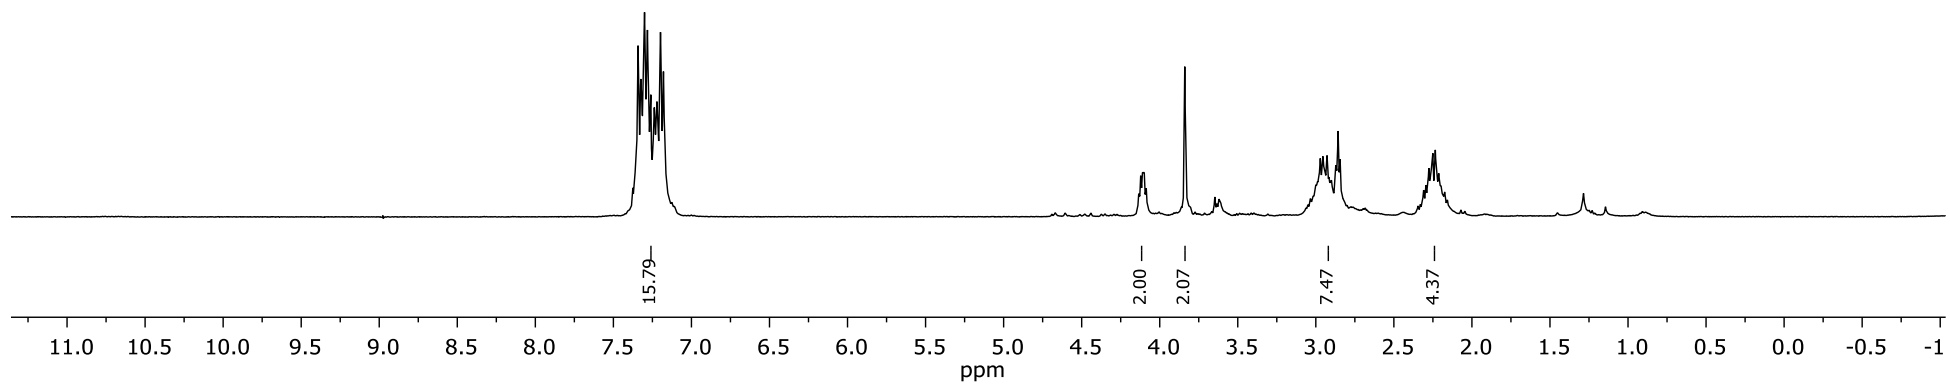

***O*-[2-(benzylamino)ethyl]-bis(2-phenylethyl)phosphinothioate (9a)**

<sup>13</sup>C\_NMR

140.67  
140.52  
139.43

128.72  
128.58  
128.34  
128.31  
127.30  
126.53

77.48  
77.16 CDCl<sub>3</sub>  
76.84

64.04  
63.97

53.38  
48.94  
48.87

36.48  
35.81

28.82  
28.79

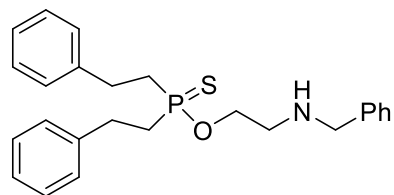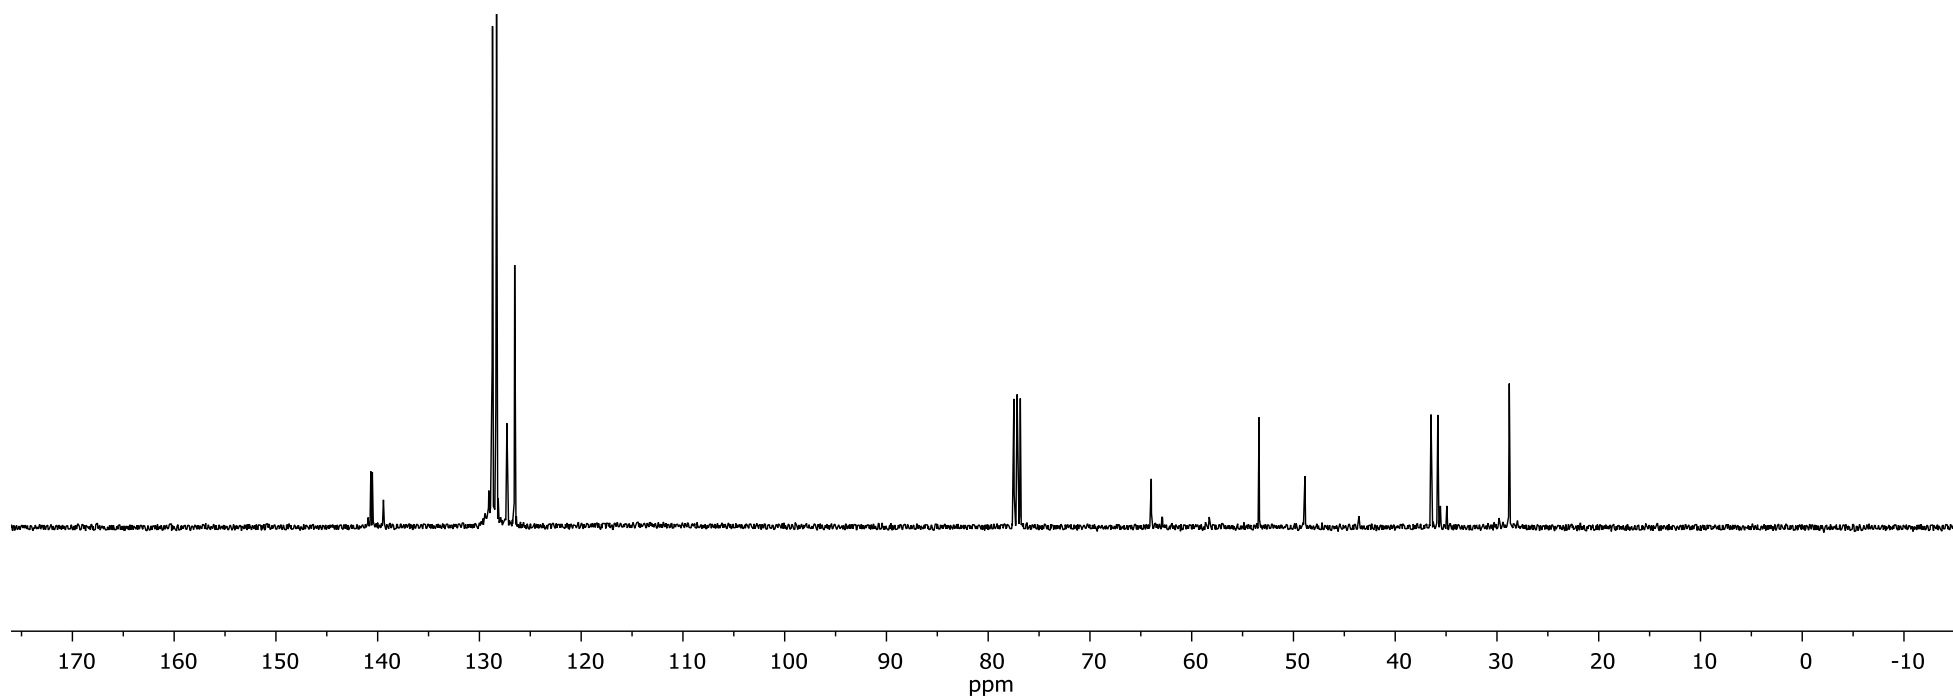

***O*-[2-(benzylamino)ethyl]-bis(2-phenylethyl)phosphinothioate (9a)**

31P\_NMR

104.06

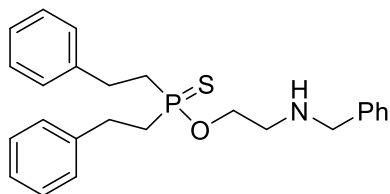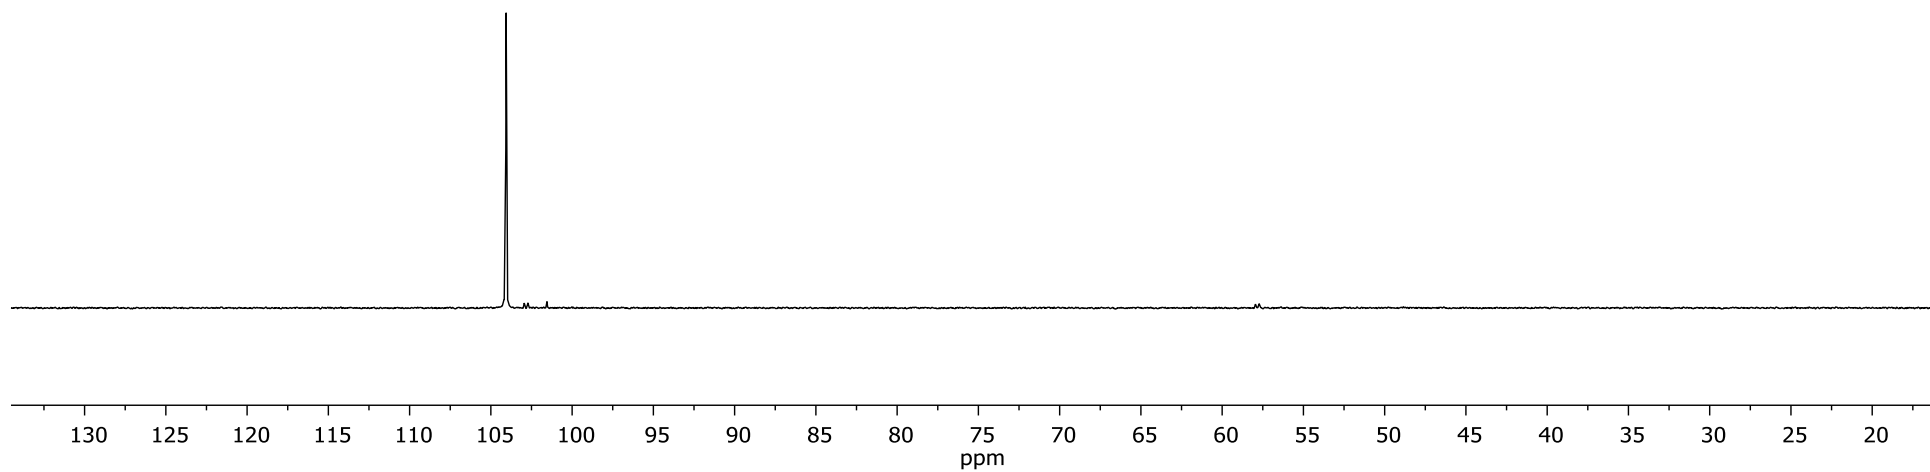



***O*-[2-(benzylamino)ethyl]-bis(2-phenylethyl)phosphoselenoate (9b)**

<sup>1</sup>H\_NMR

7.38  
7.36  
7.34  
7.32  
7.30  
7.29  
7.26 CDCl<sub>3</sub>  
7.24  
7.22  
7.20

4.15  
4.14  
4.13  
4.12  
4.10  
3.86  
3.03  
3.00  
2.99  
2.97  
2.95  
2.93  
2.89  
2.88  
2.87  
2.46  
2.45  
2.42  
2.40  
2.38  
2.36

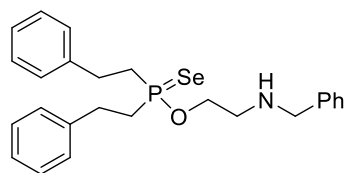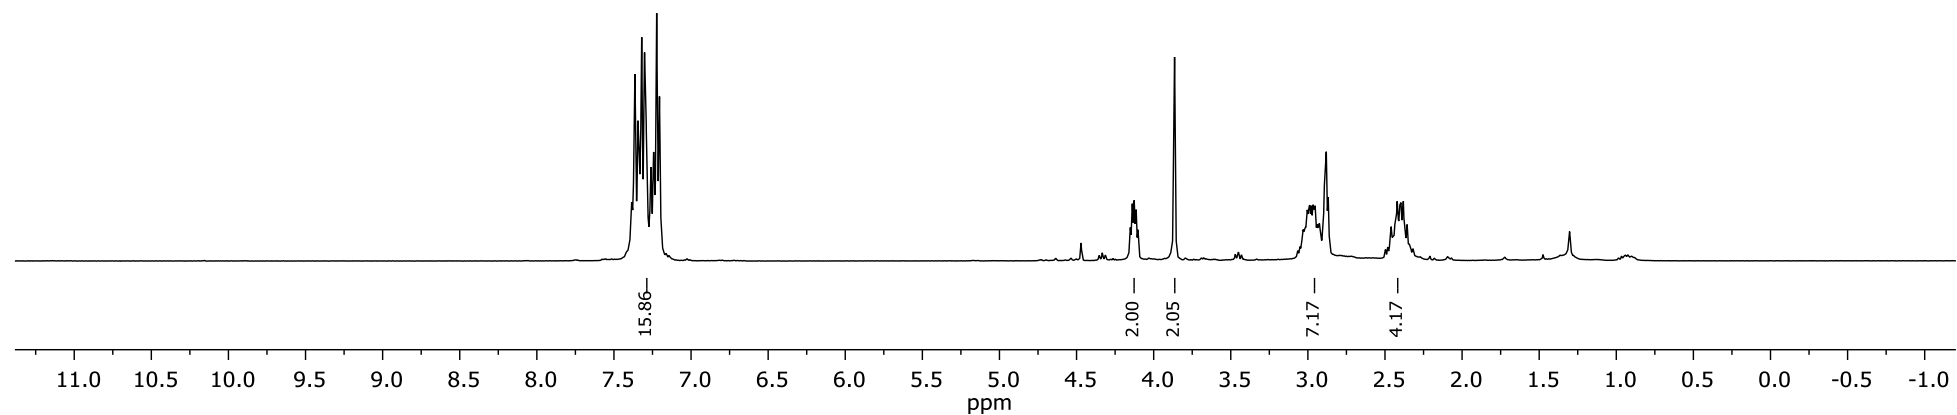

***O*-[2-(benzylamino)ethyl]-bis(2-phenylethyl)phosphinoselenoate (9b)**

<sup>13</sup>C\_NMR

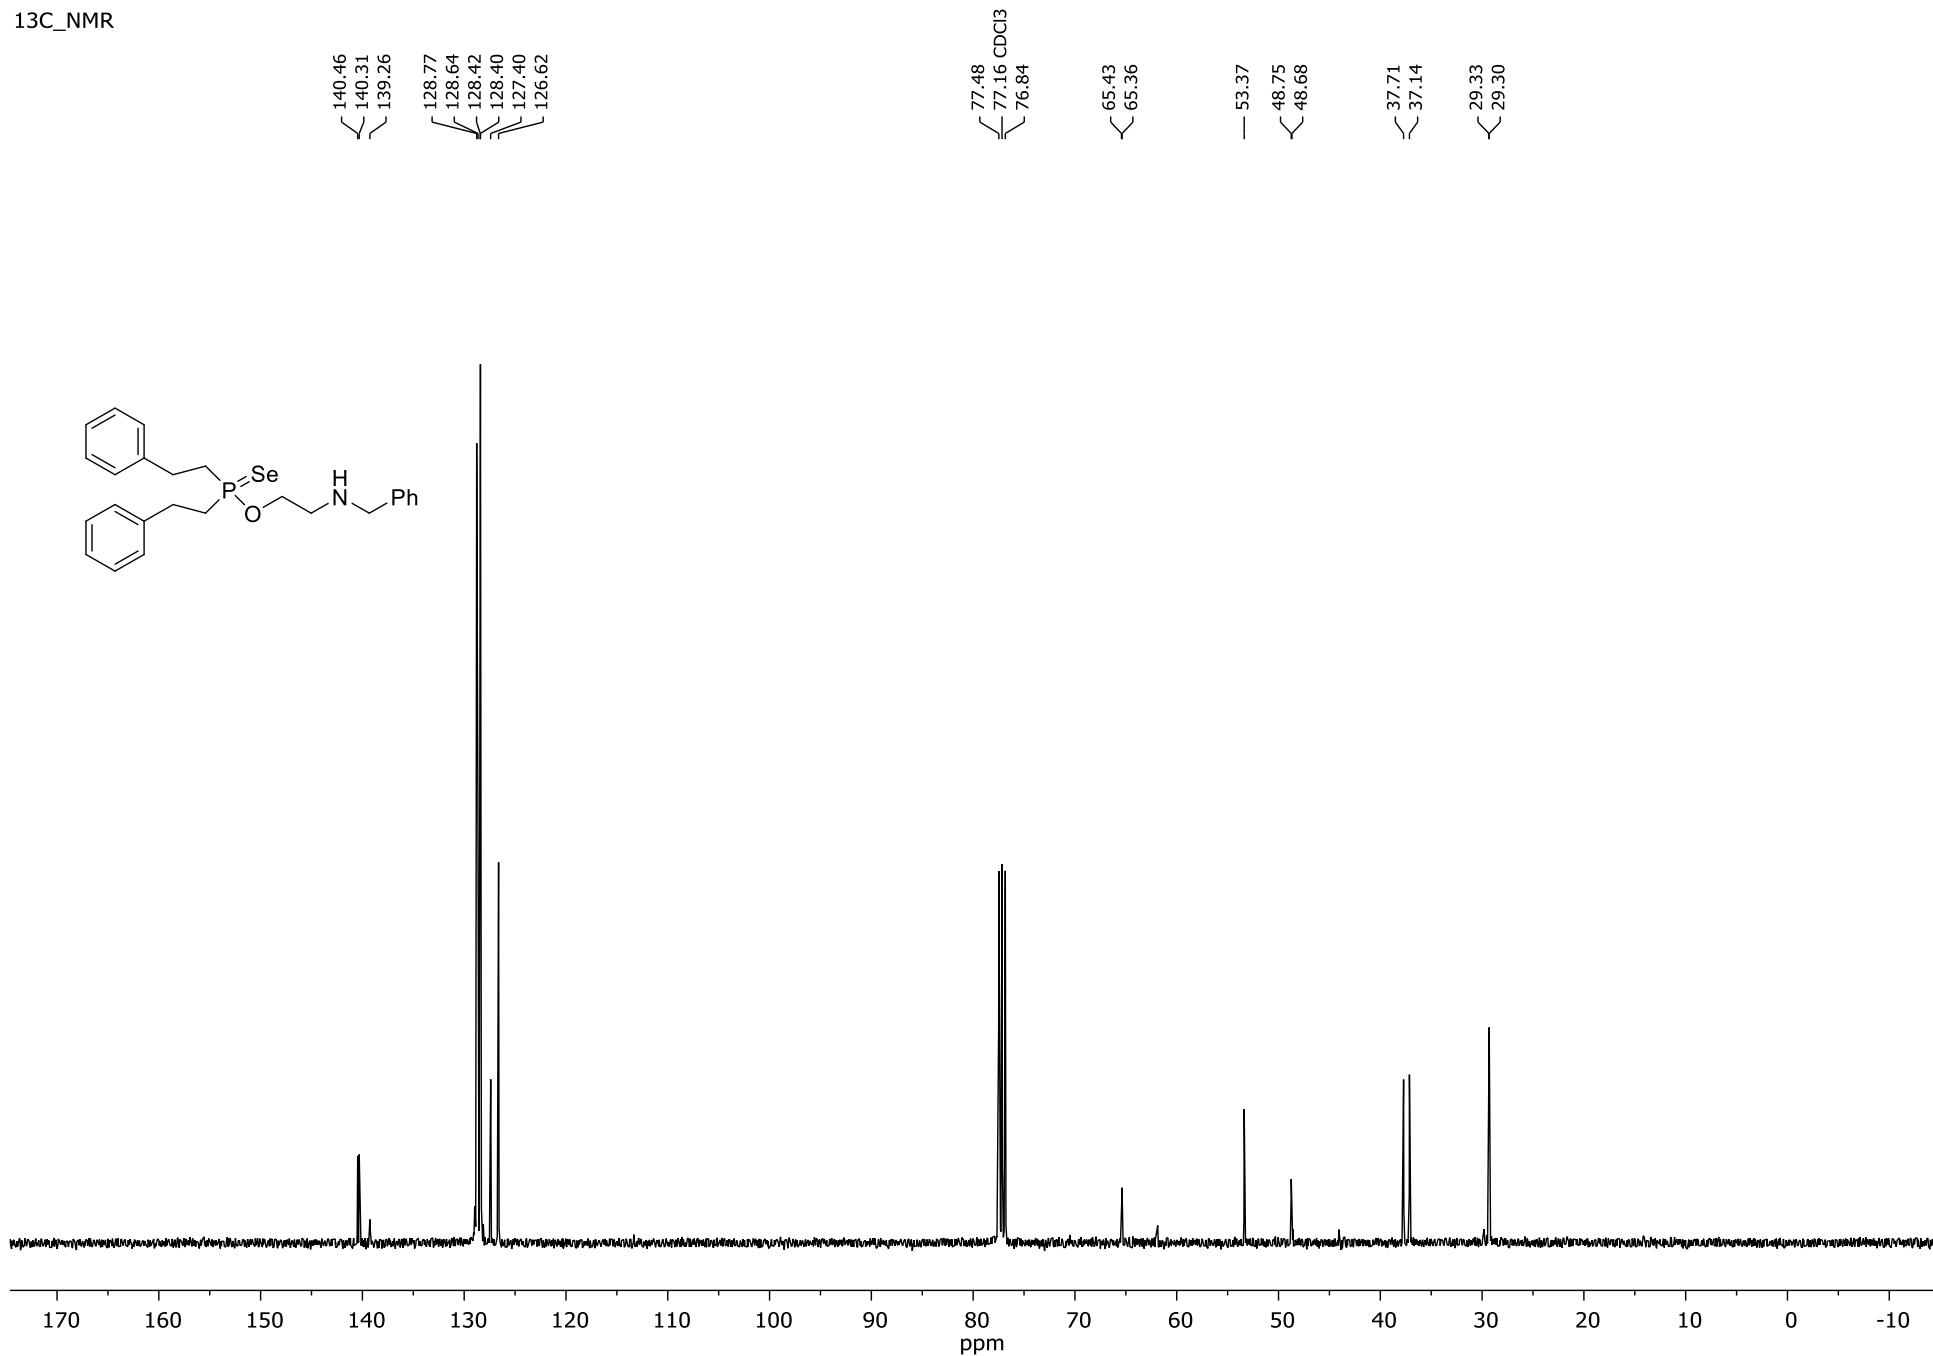

***O*-[2-(benzylamino)ethyl]-bis(2-phenylethyl)phosphinoselenoate (9b)**

31P\_NMR

106.92  
104.53  
102.13

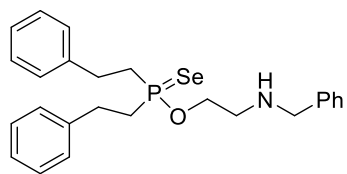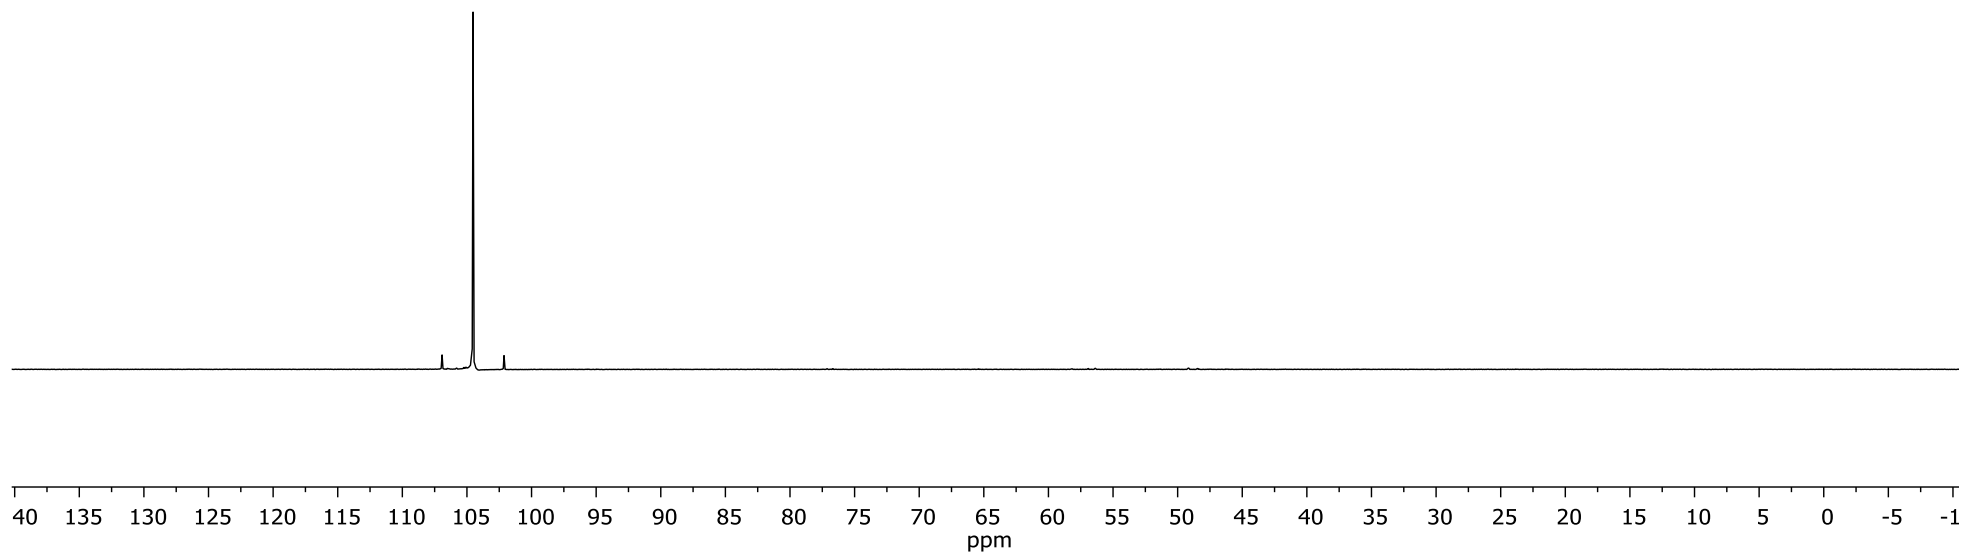

# 2-amino-5-nitrophenyl diphenylphosphinate (12a)

<sup>1</sup>H\_NMR

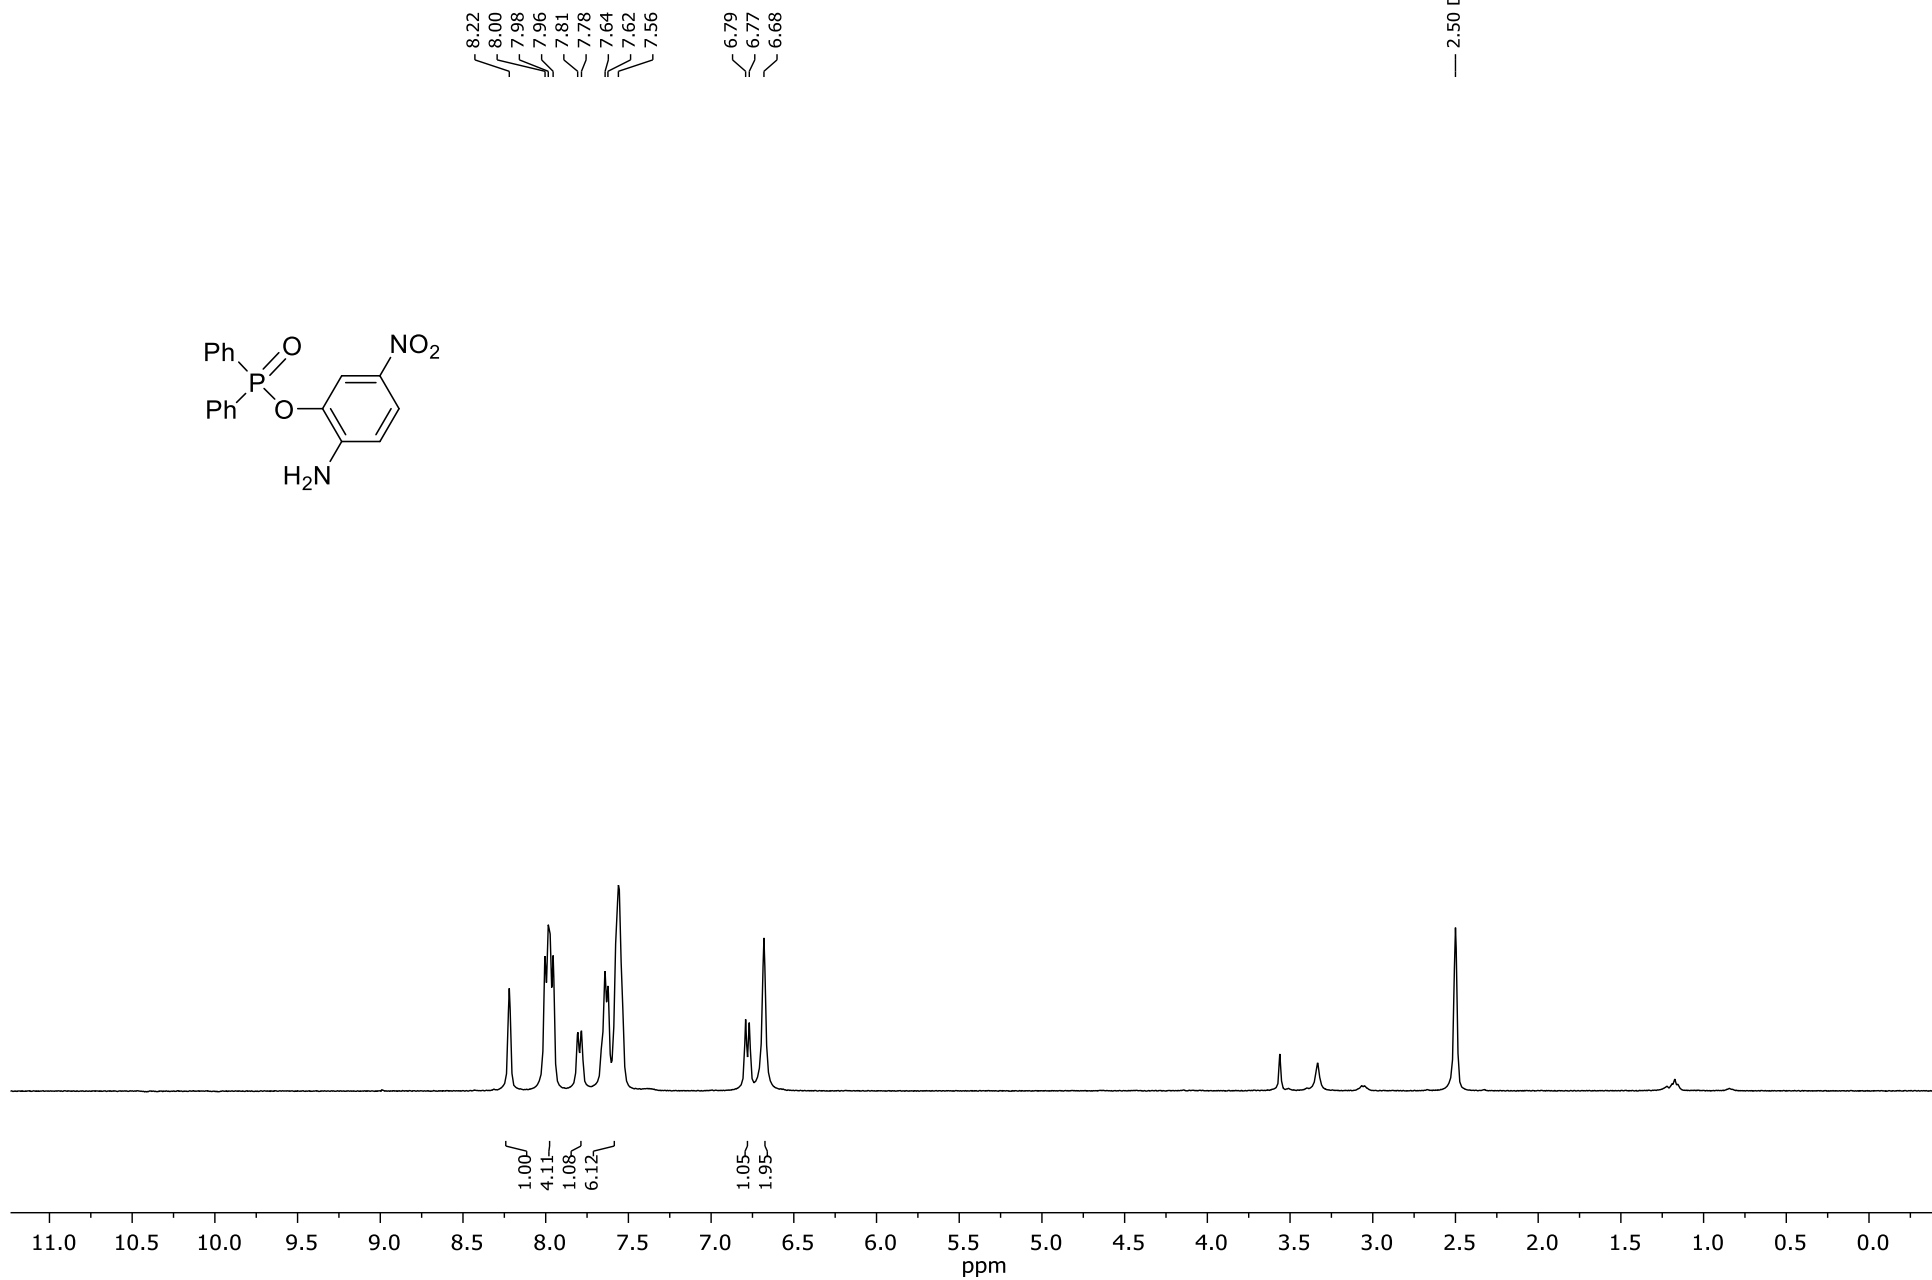

# 2-amino-5-nitrophenyl diphenylphosphinate (12a)

<sup>13</sup>C-NMR

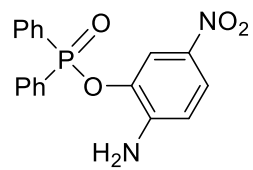

147.16  
147.12  
135.43  
135.35  
134.91  
133.03  
133.01  
131.59  
131.48  
130.68  
129.33  
128.94  
128.81  
— 122.48  
116.50  
116.46  
113.70

39.94  
39.73  
39.52 DMSO-d6  
39.31  
39.10

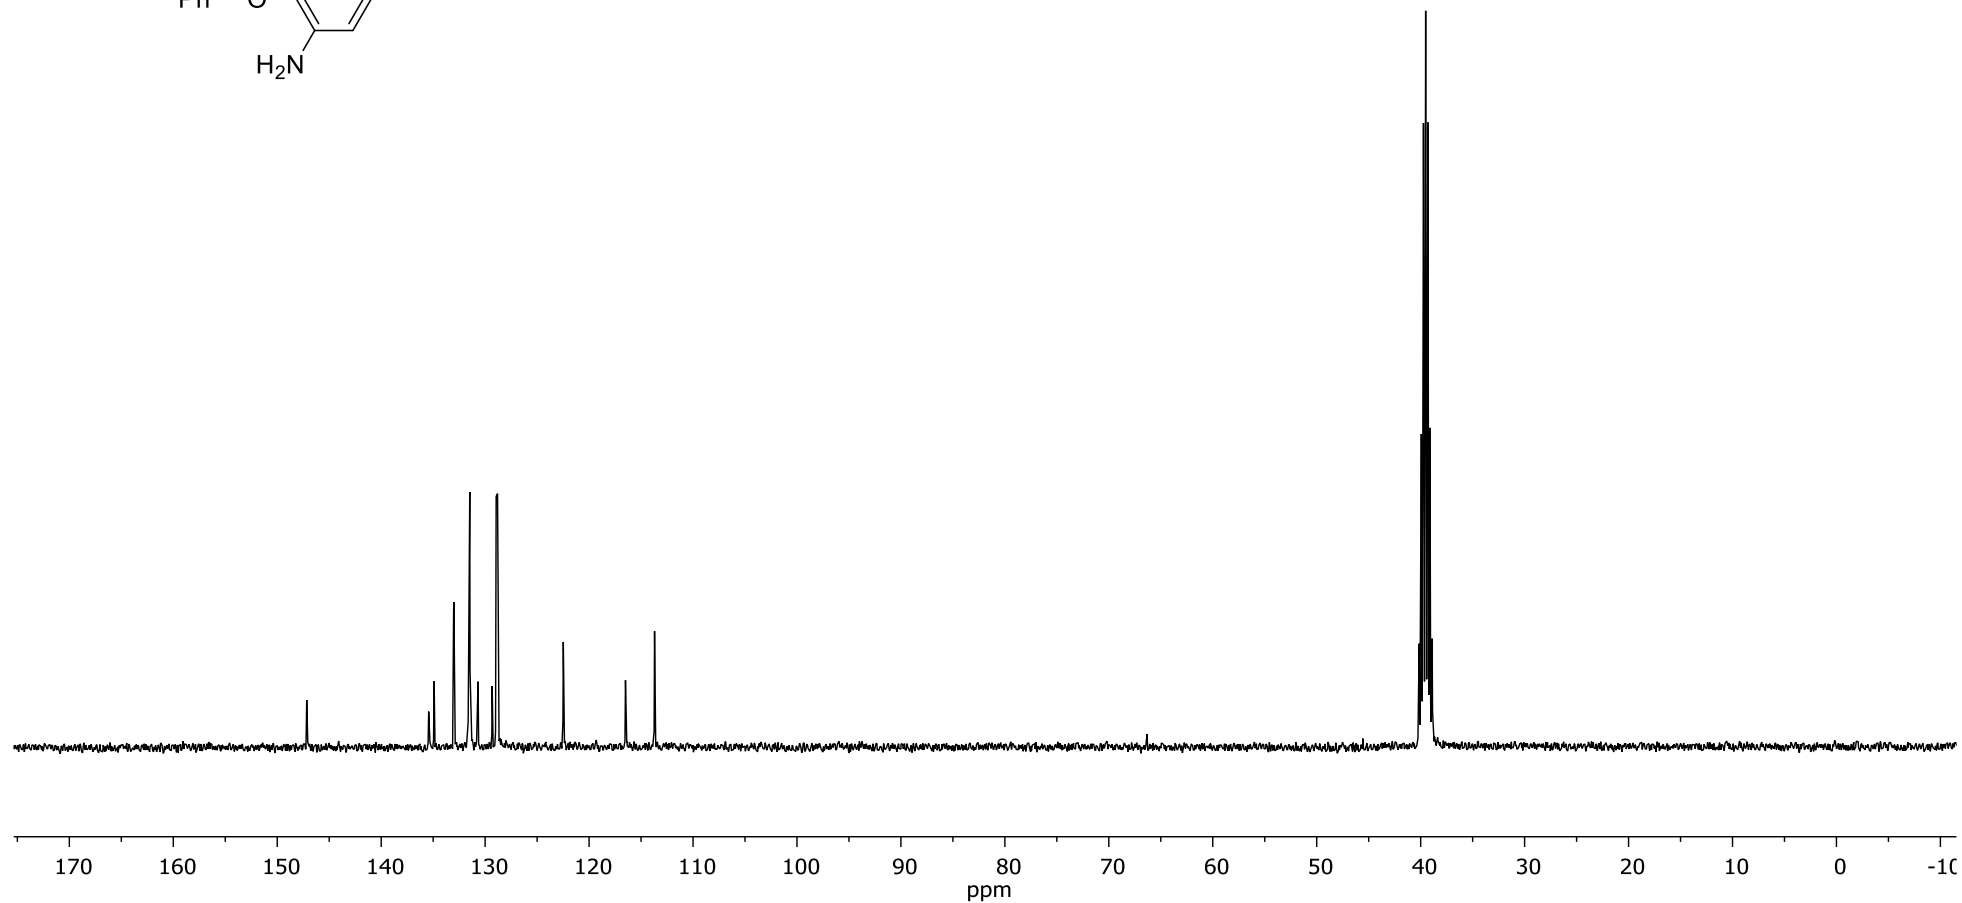

**2-amino-5-nitrophenyl diphenylphosphinate (12a)**

31P\_NMR

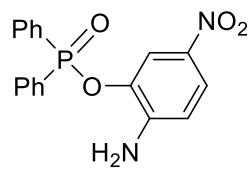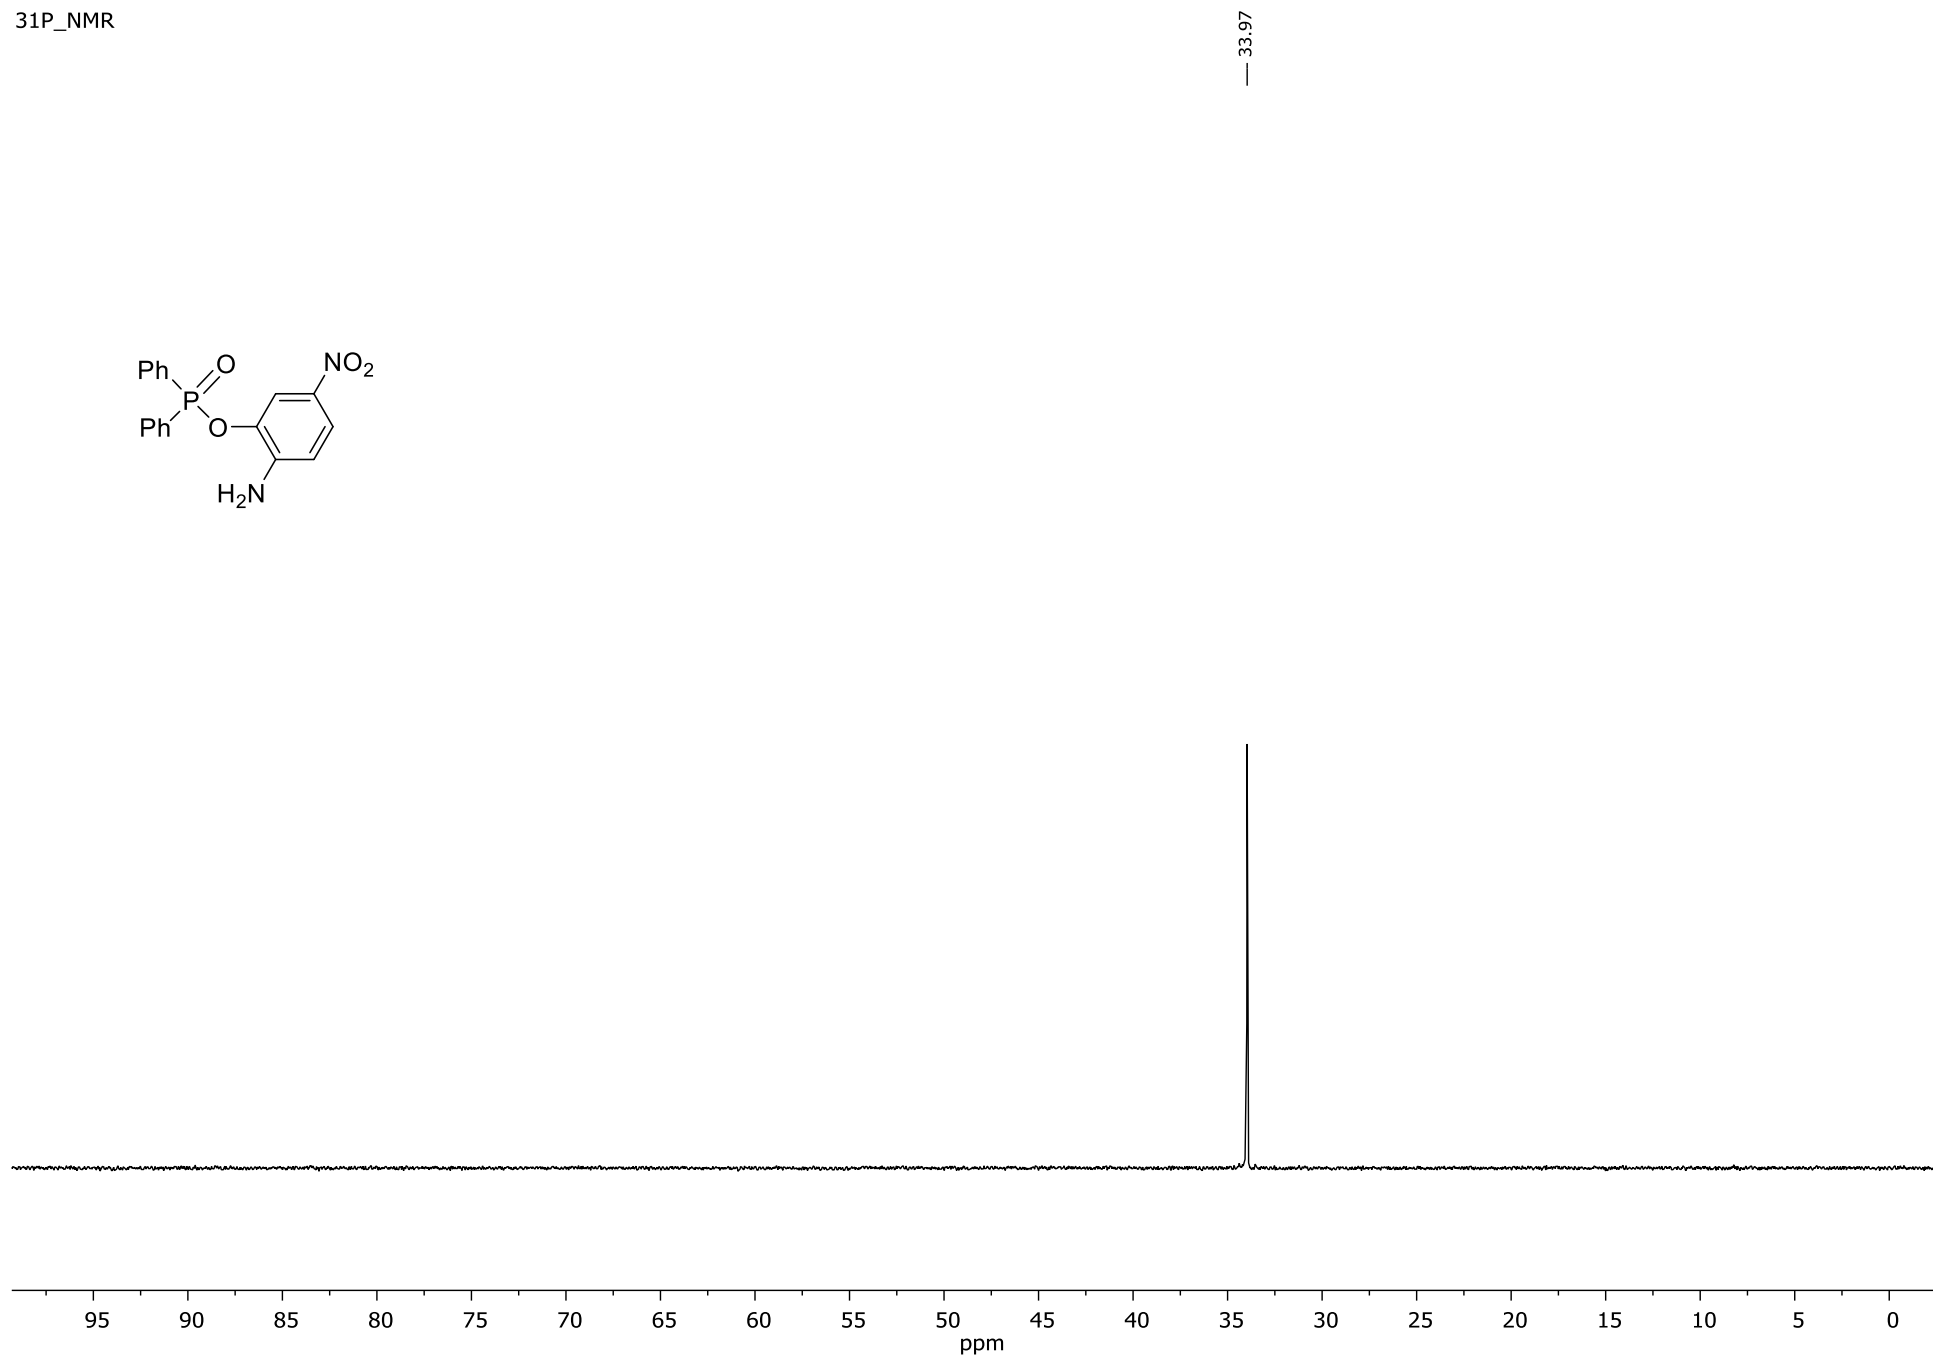

# 2-amino-5-nitrophenyl bis(2-phenylethyl)phosphinate (12b)

<sup>1</sup>H\_NMR

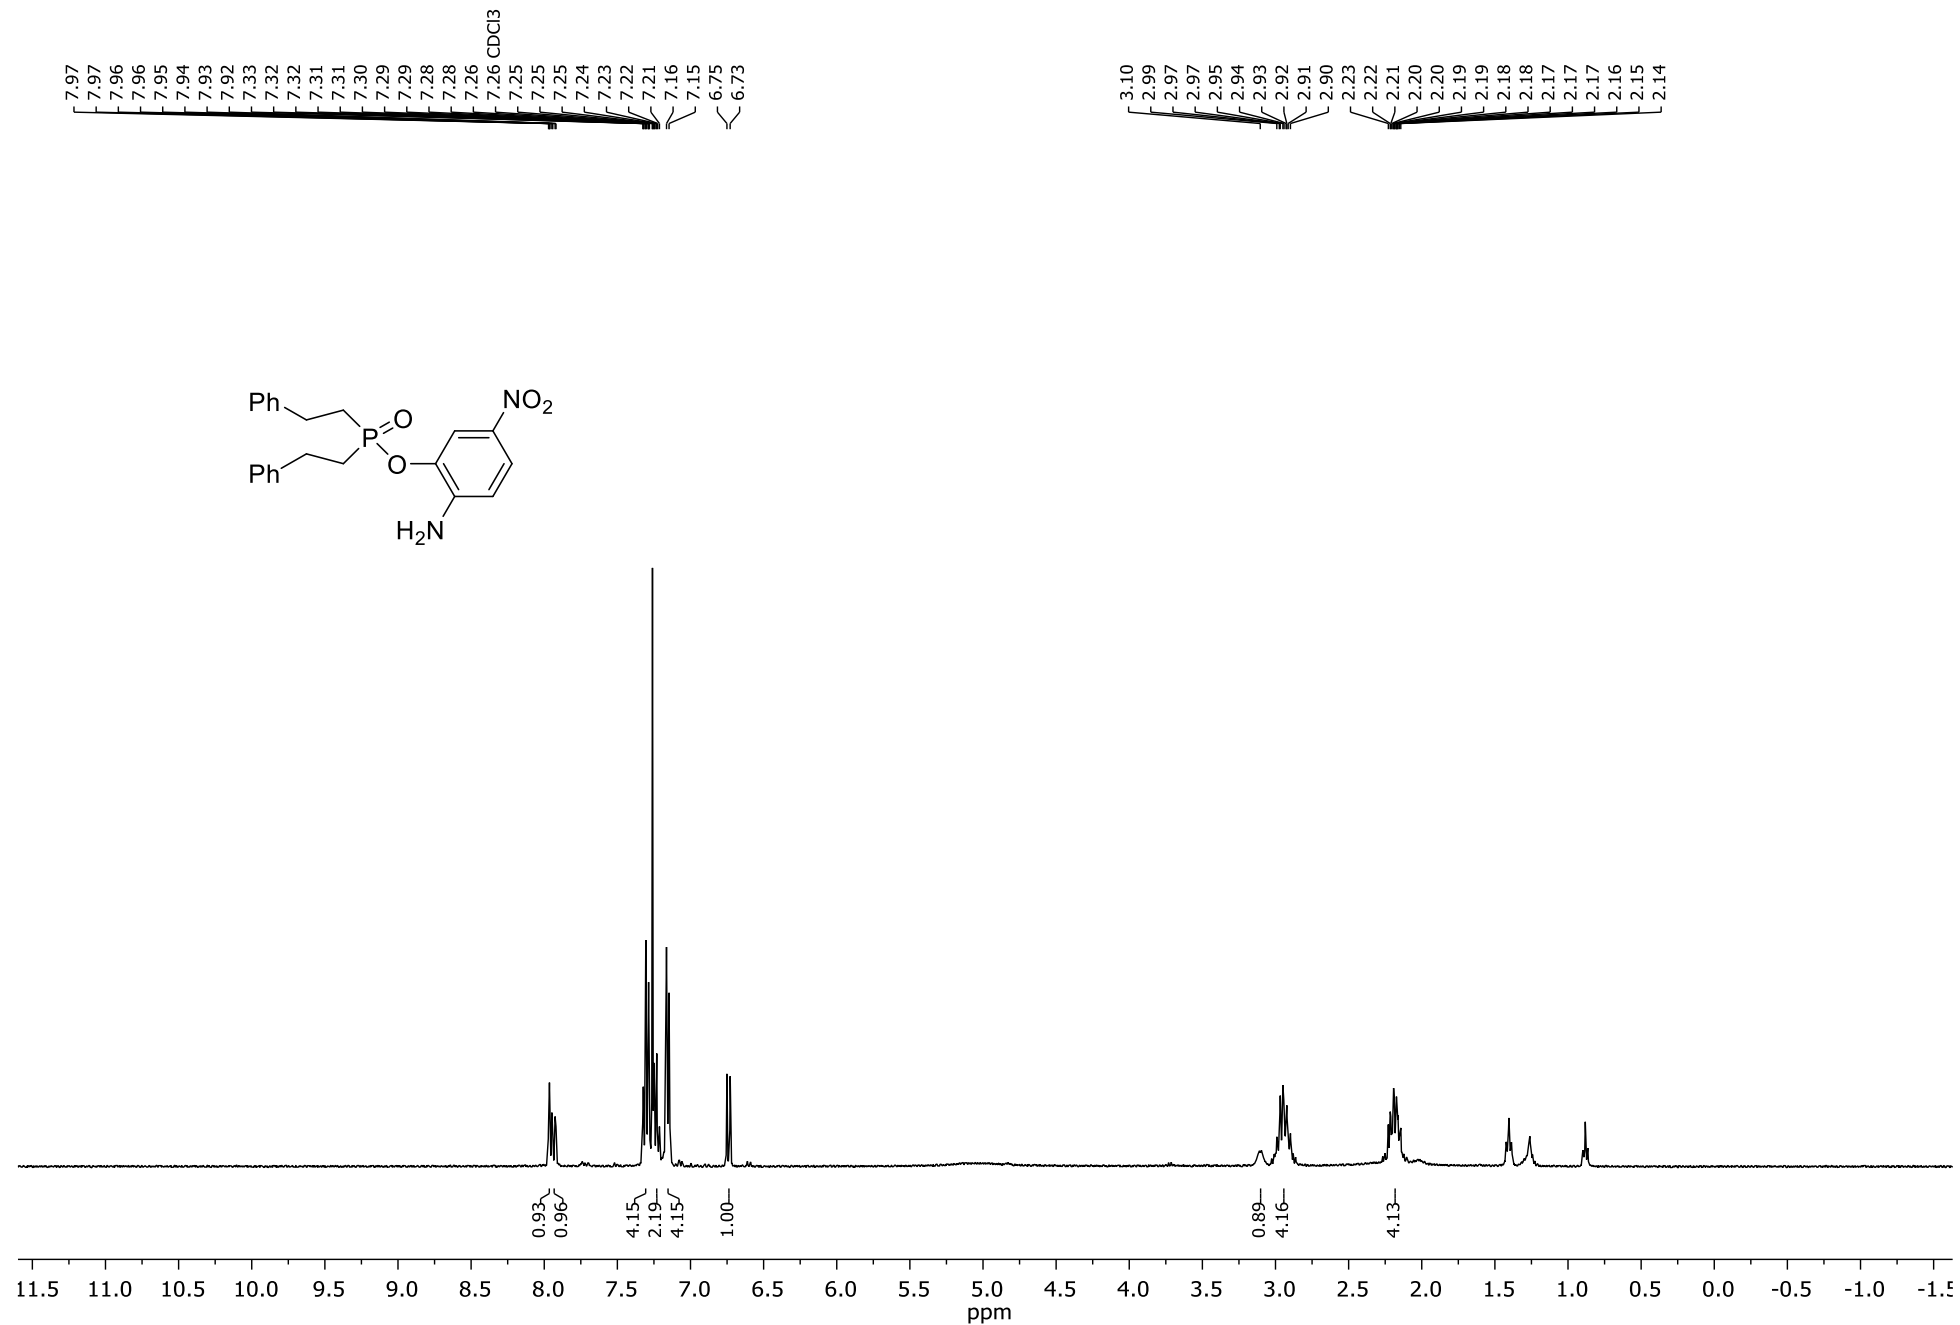

# 2-amino-5-nitrophenyl bis(2-phenylethyl)phosphinate (12b)

<sup>13</sup>C\_NMR

145.99  
140.04  
139.90  
138.29  
136.43  
128.94  
128.20  
126.91  
122.87  
118.00  
115.06

77.48  
77.16 CDCl<sub>3</sub>  
76.84

30.36  
29.52  
28.05

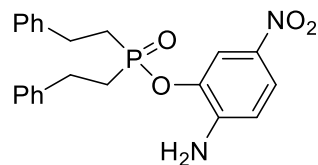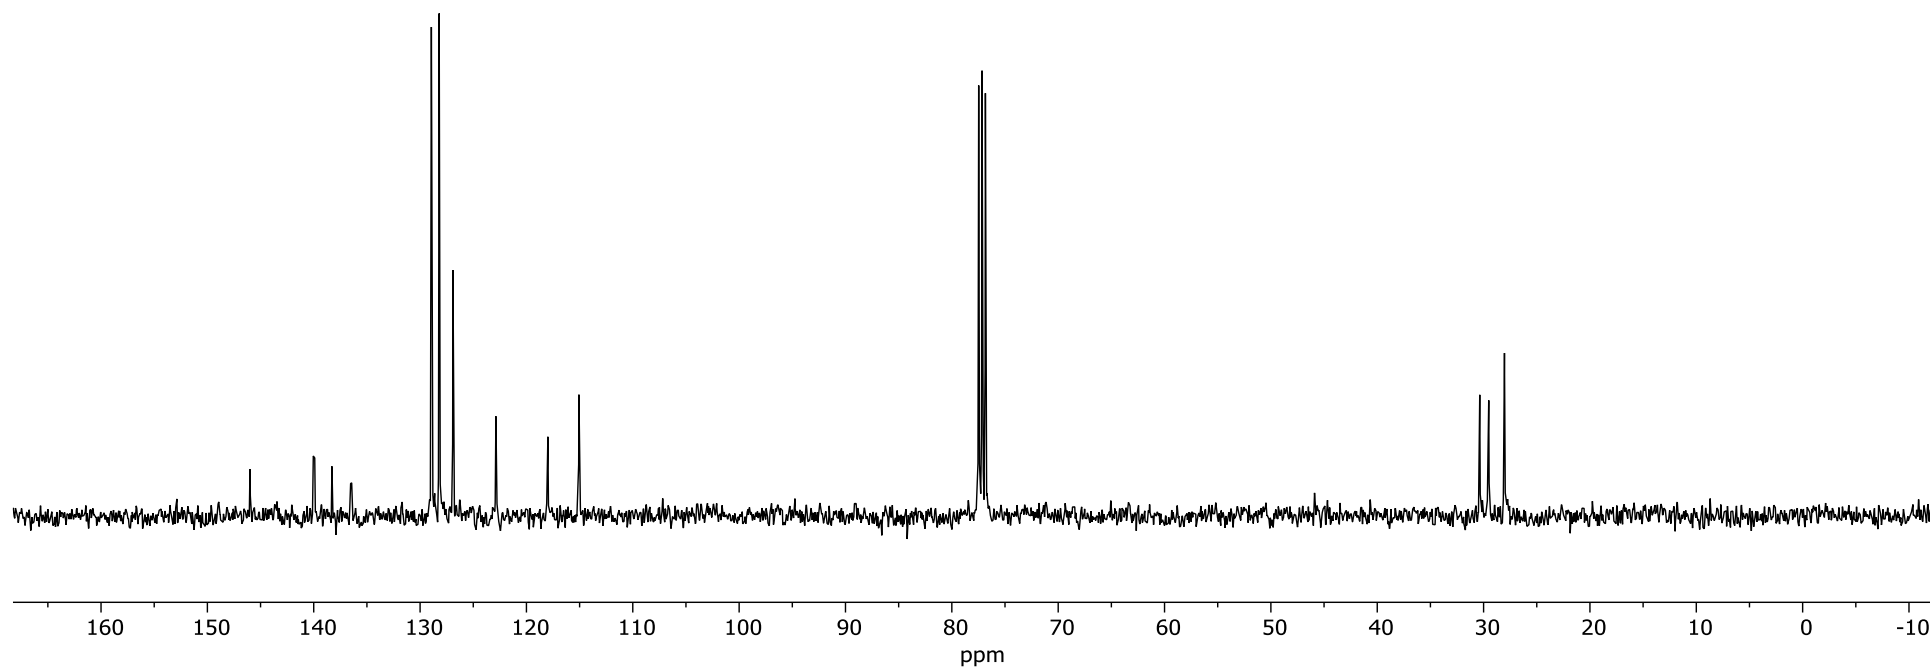



# 2-amino-5-nitrophenyl bis(2-phenylethyl)phosphinate (12b)

<sup>31</sup>P\_NMR

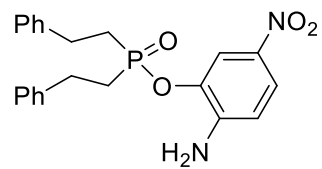

— 60.74

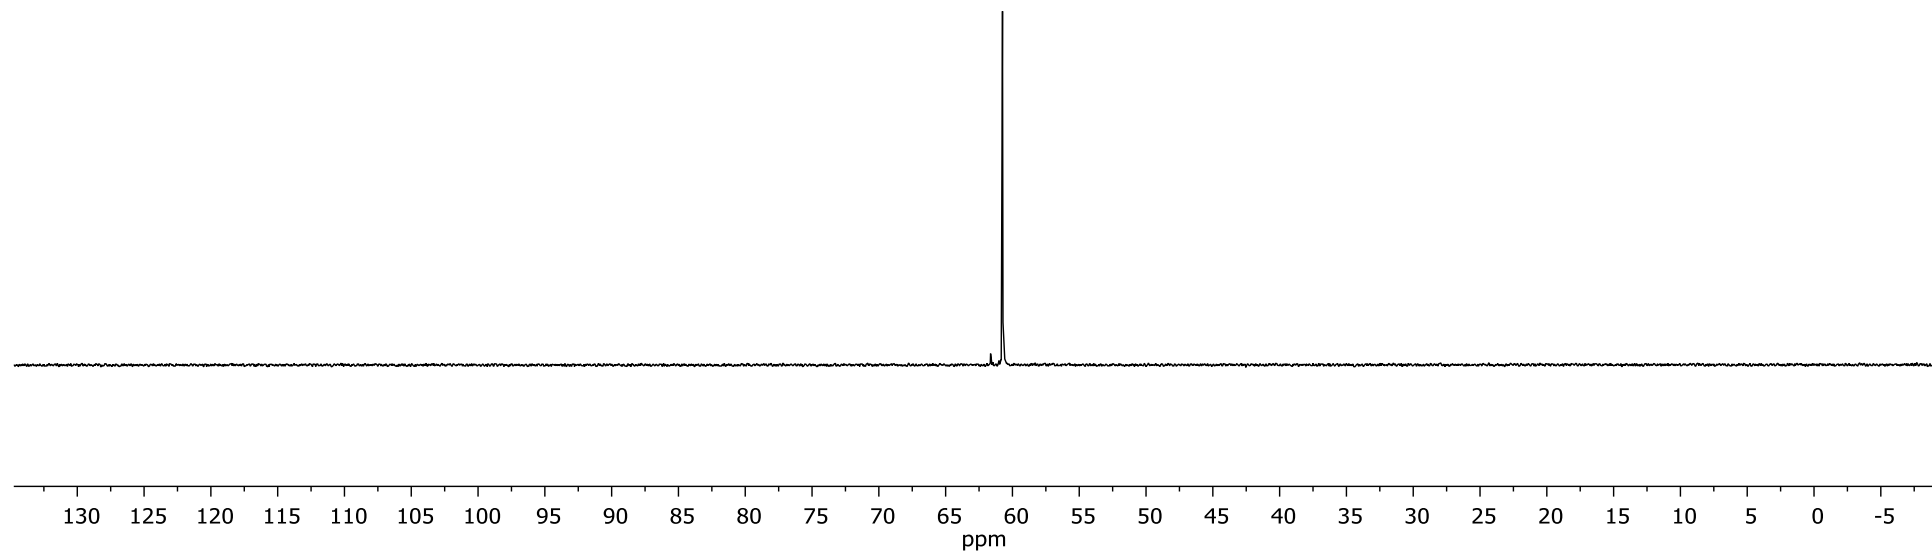

# 2-amino-5-nitrophenyl bis[2-(4-chlorophenyl)ethyl]phosphinate (12c)

<sup>1</sup>H-NMR

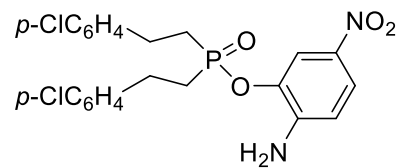

8.08  
7.88  
7.85  
7.34  
7.32  
7.27  
7.25  
6.80  
6.78  
6.73

2.89  
2.87  
2.86  
2.82  
2.79  
2.77  
2.76  
2.50 DMSO-d6  
2.32  
2.30  
2.27  
2.26  
2.24

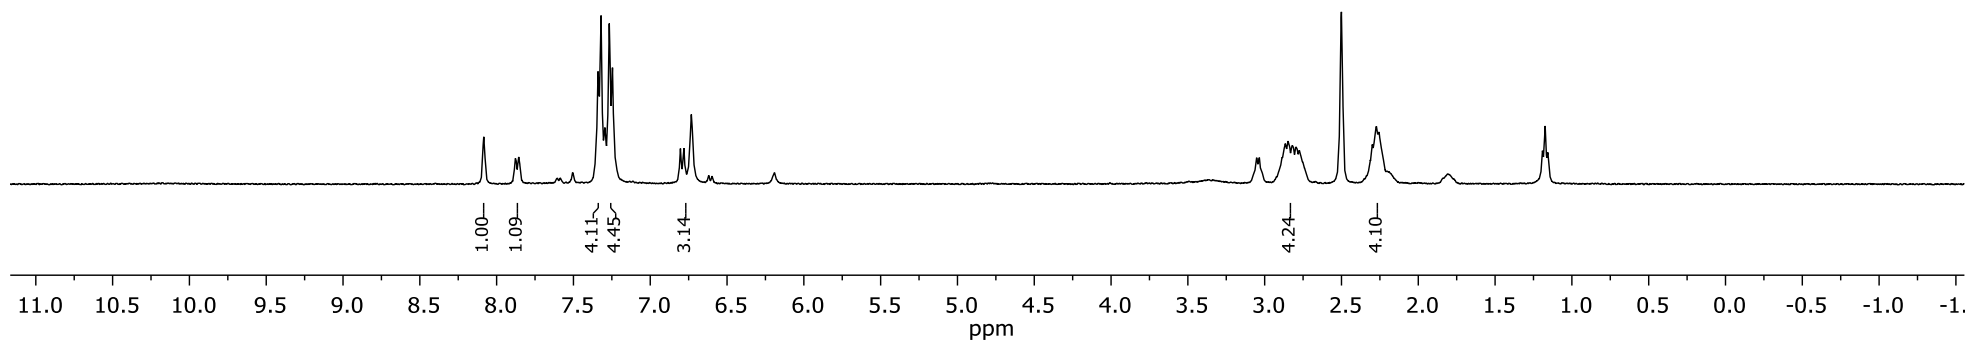

# 2-amino-5-nitrophenyl bis[2-(4-chlorophenyl)ethyl]phosphinate (12c)

<sup>13</sup>C\_NMR

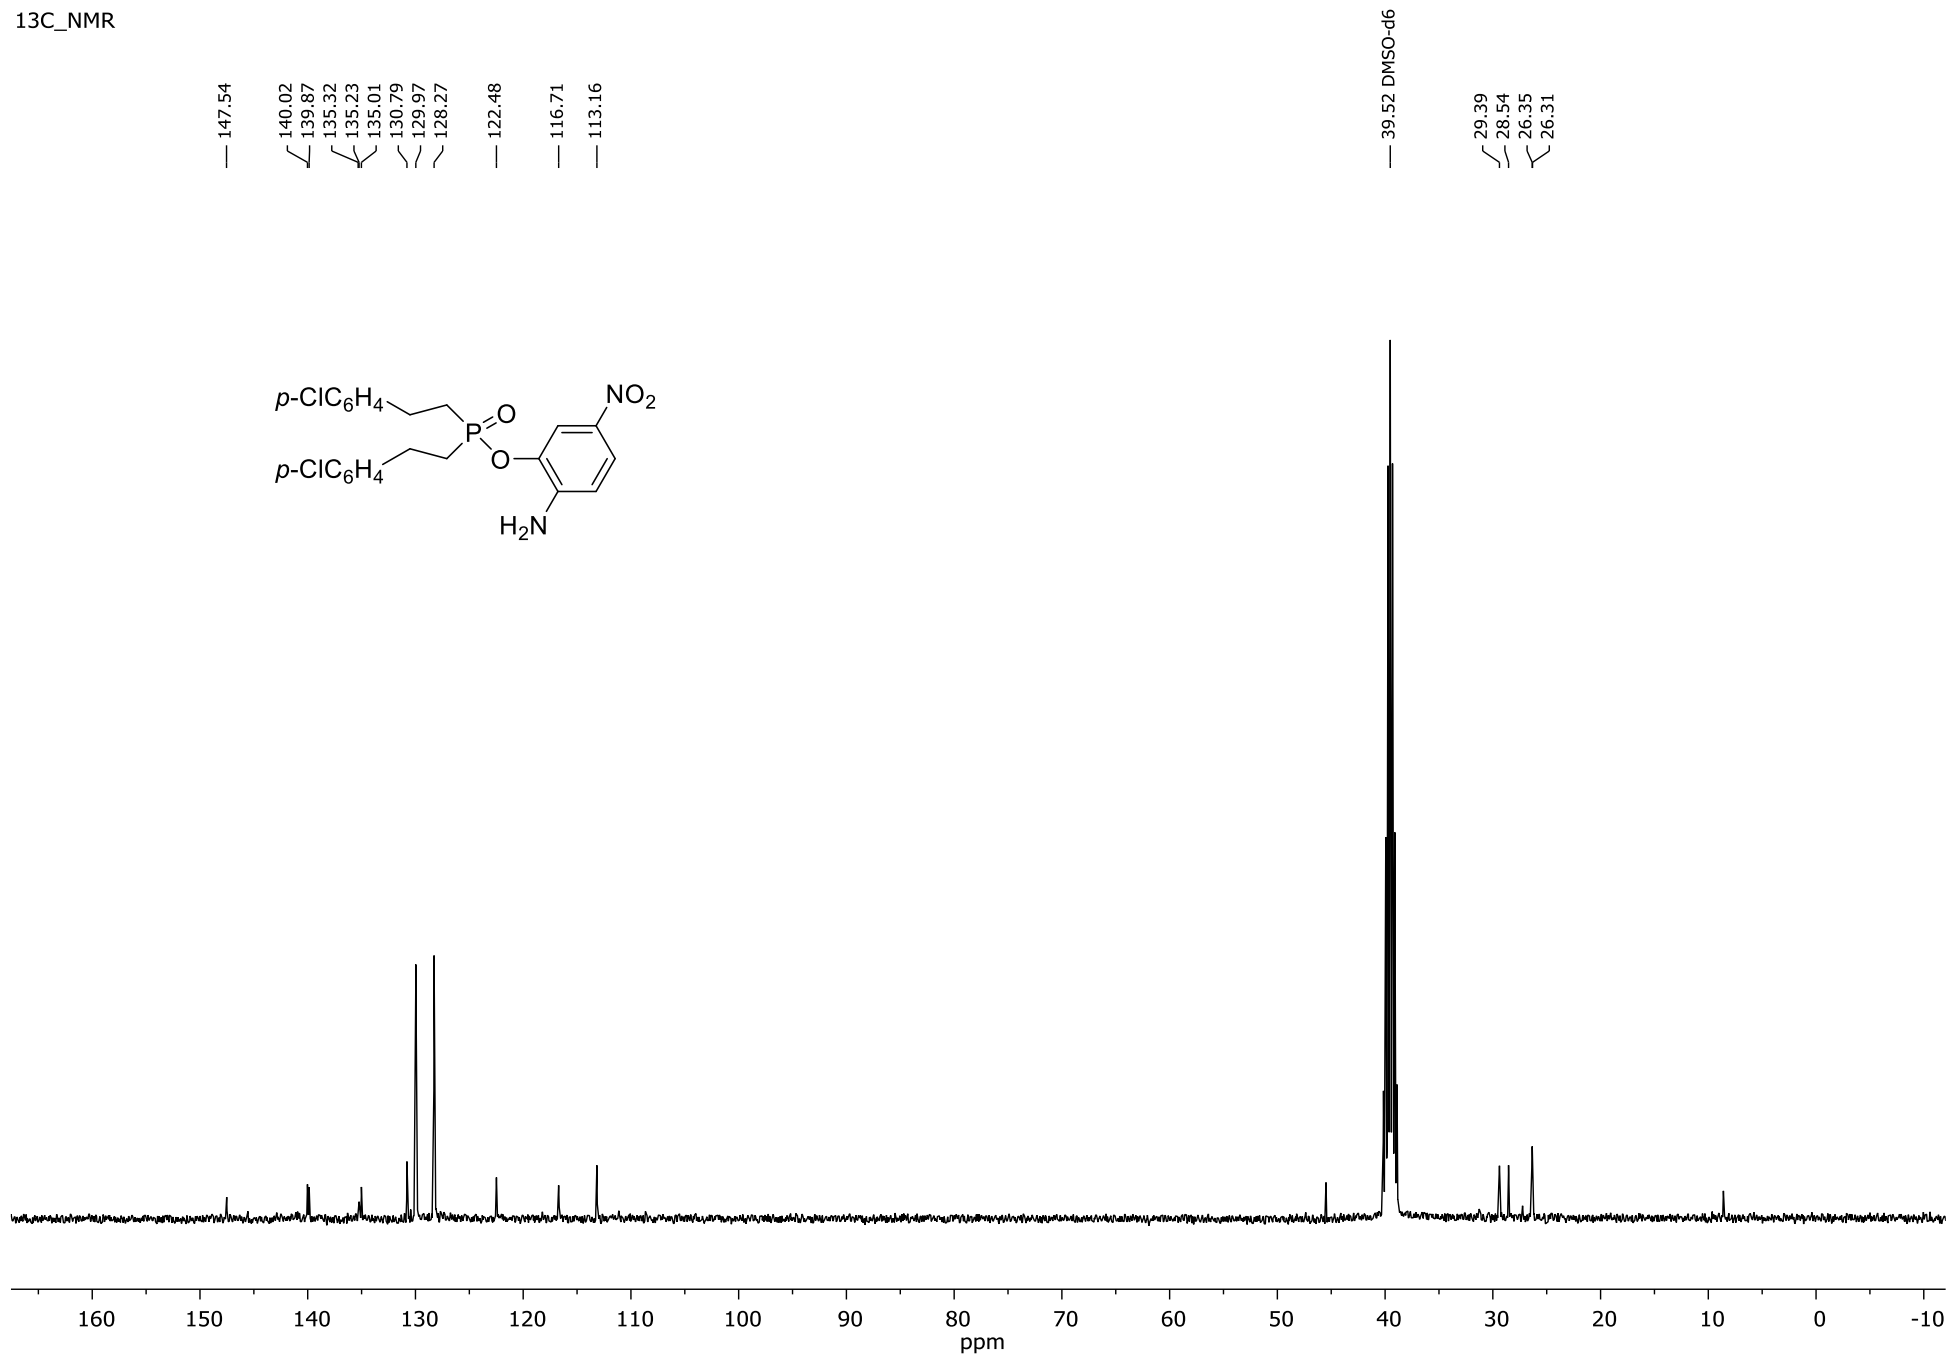

# 2-amino-5-nitrophenyl bis[2-(4-chlorophenyl)ethyl]phosphinate (12c)

<sup>31</sup>P-NMR

60.10

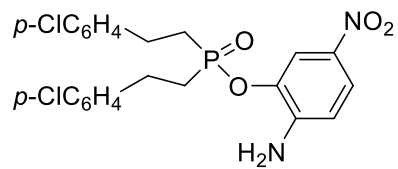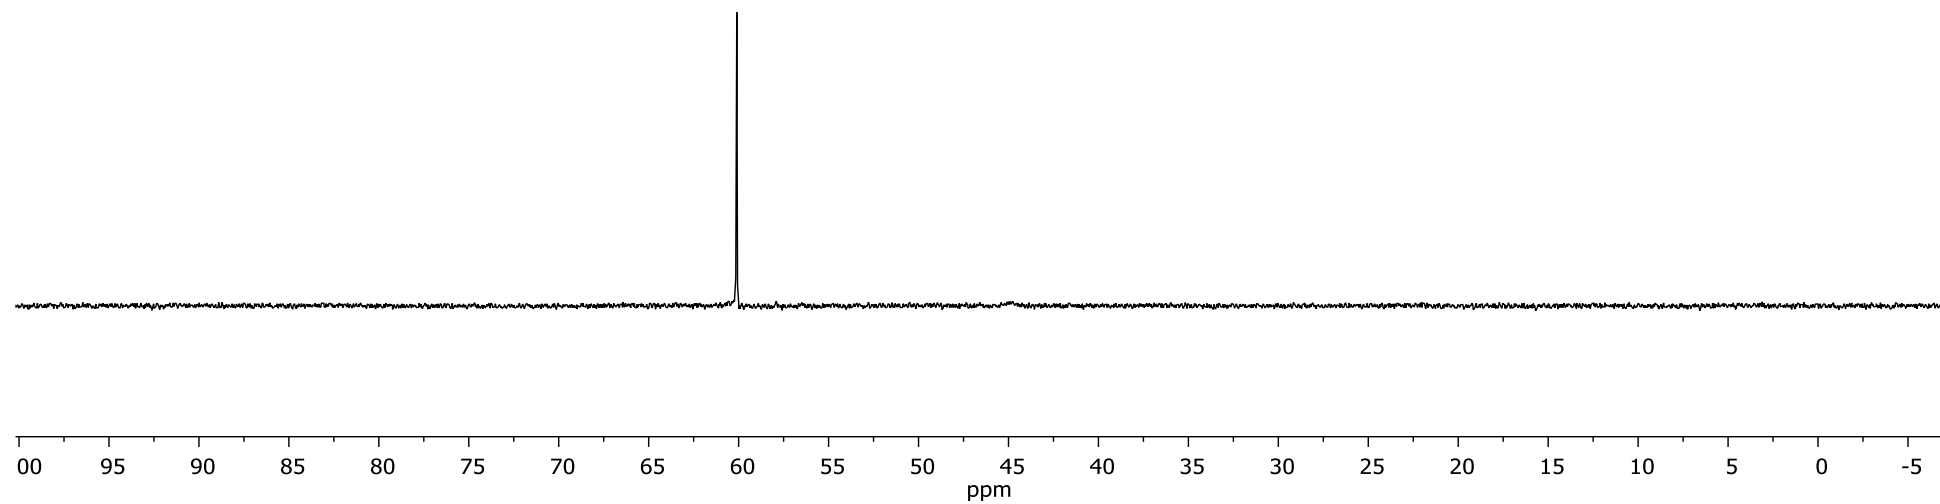

***O*-(2-aminopyridin-3-yl) bis(2-phenylethyl)phosphinothioate (12d)**

<sup>1</sup>H\_NMR

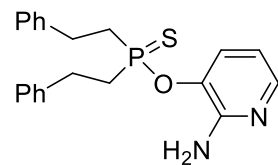

8.12  
7.80  
7.79  
7.64  
7.62  
7.31  
7.29  
7.28  
7.26  
7.22  
7.20  
7.18  
6.58  
6.57  
6.56  
6.55  
5.69

3.11  
3.05  
3.02  
2.98  
2.95  
2.93  
2.63  
2.59  
2.58  
2.55  
2.54  
2.53  
2.05 (CD<sub>3</sub>)<sub>2</sub>CO  
2.04

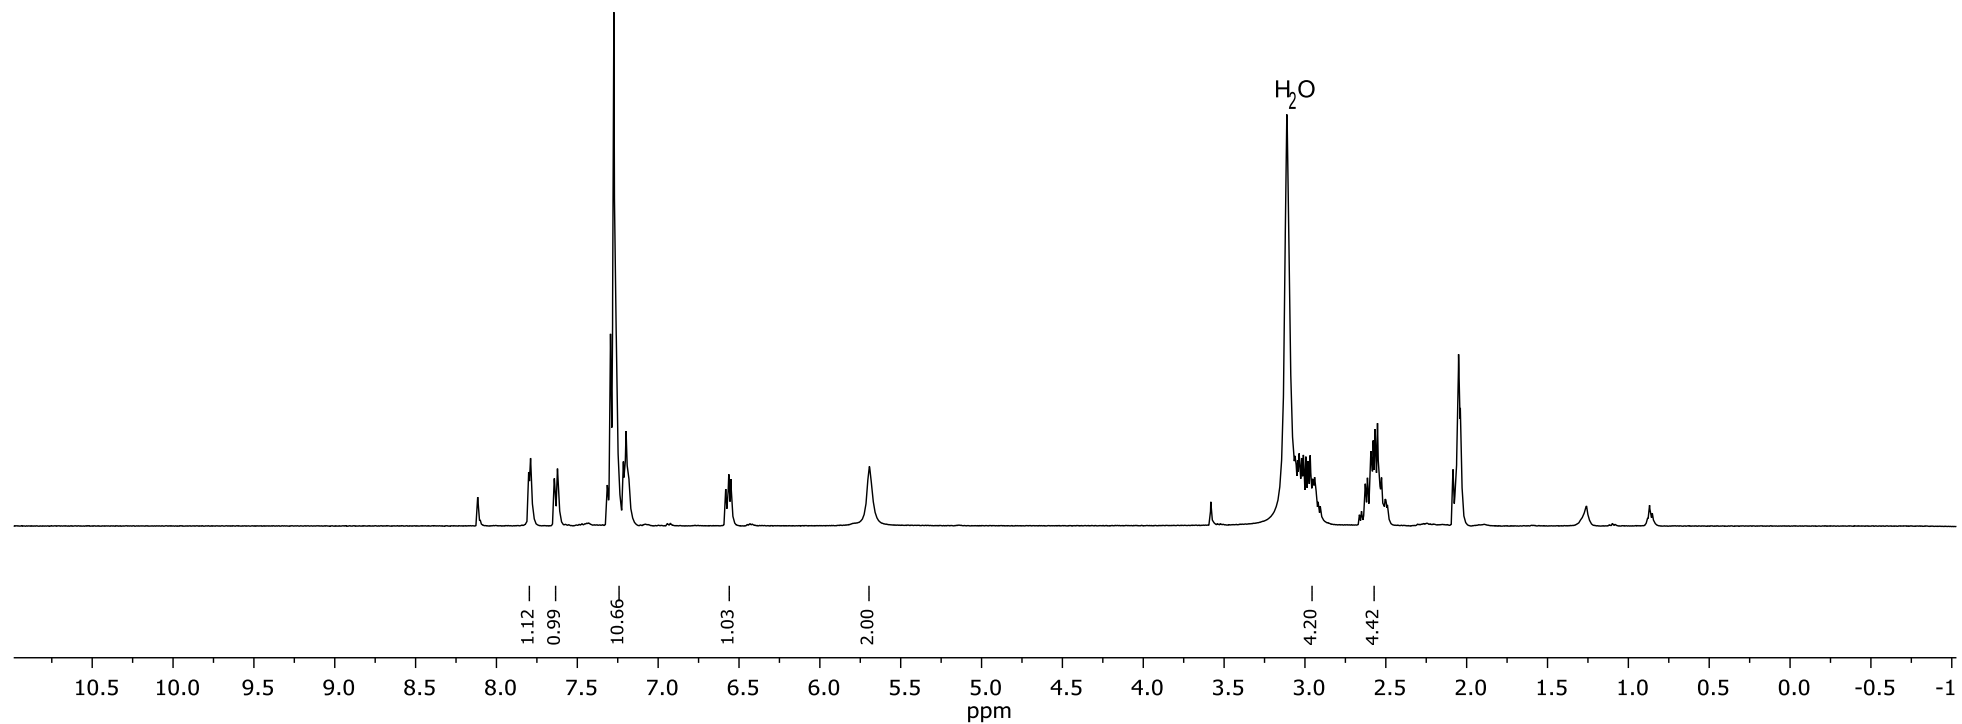

***O*-(2-aminopyridin-3-yl) bis(2-phenylethyl)phosphinothioate (12d)**

<sup>13</sup>C\_NMR

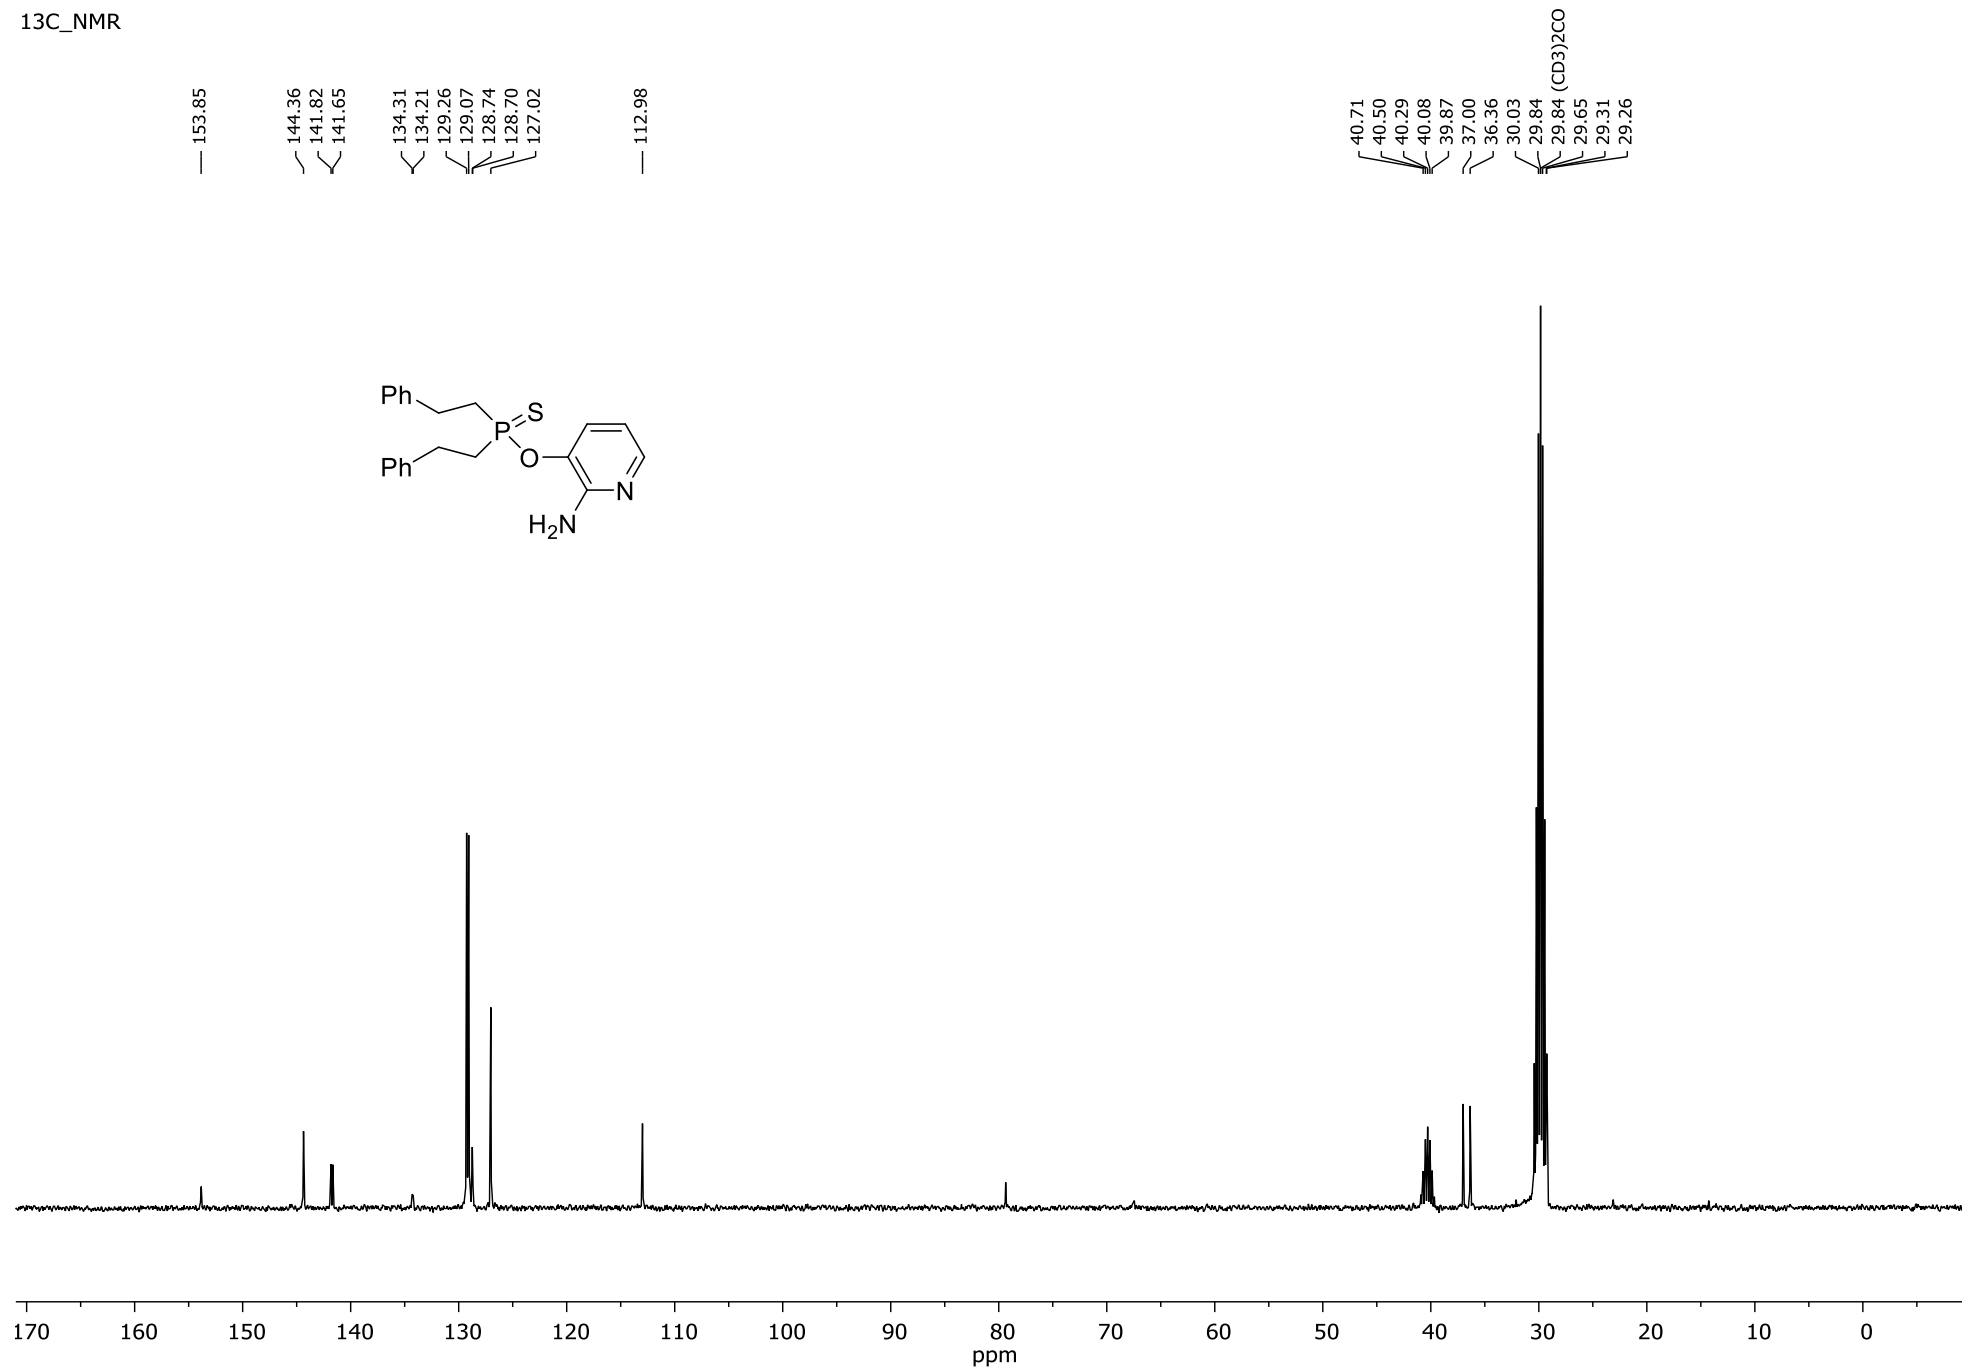

***O*-(2-aminopyridin-3-yl) bis(2-phenylethyl)phosphinothioate (12d)**

<sup>31</sup>P-NMR

— 109.36

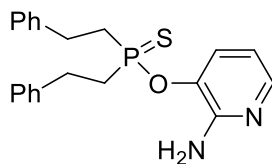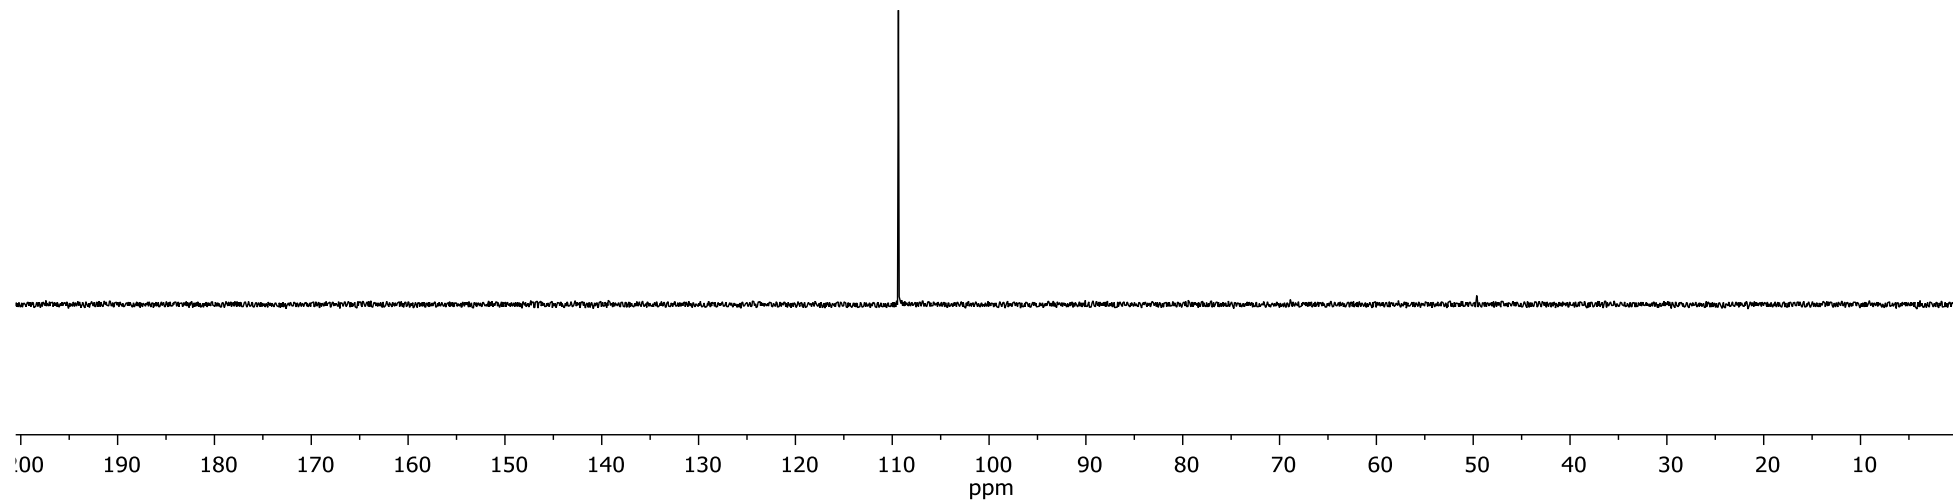

***O*-(2-amino-5-nitrophenyl) bis(2-phenylethyl)phosphinothioate (12e)**

1H\_NMR

8.03  
8.02  
8.02  
7.91  
7.91  
7.89  
7.89  
7.30  
7.28  
7.26 CDCl3  
7.26  
7.22  
7.22  
7.20  
7.17  
7.15  
7.15  
6.71  
6.69

— 4.57

3.04  
3.01  
3.00  
2.99  
2.98  
2.97  
2.94  
2.46  
2.45  
2.45  
2.42  
2.40  
2.39  
2.38

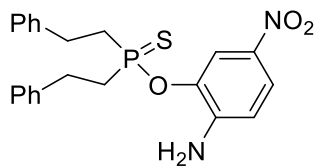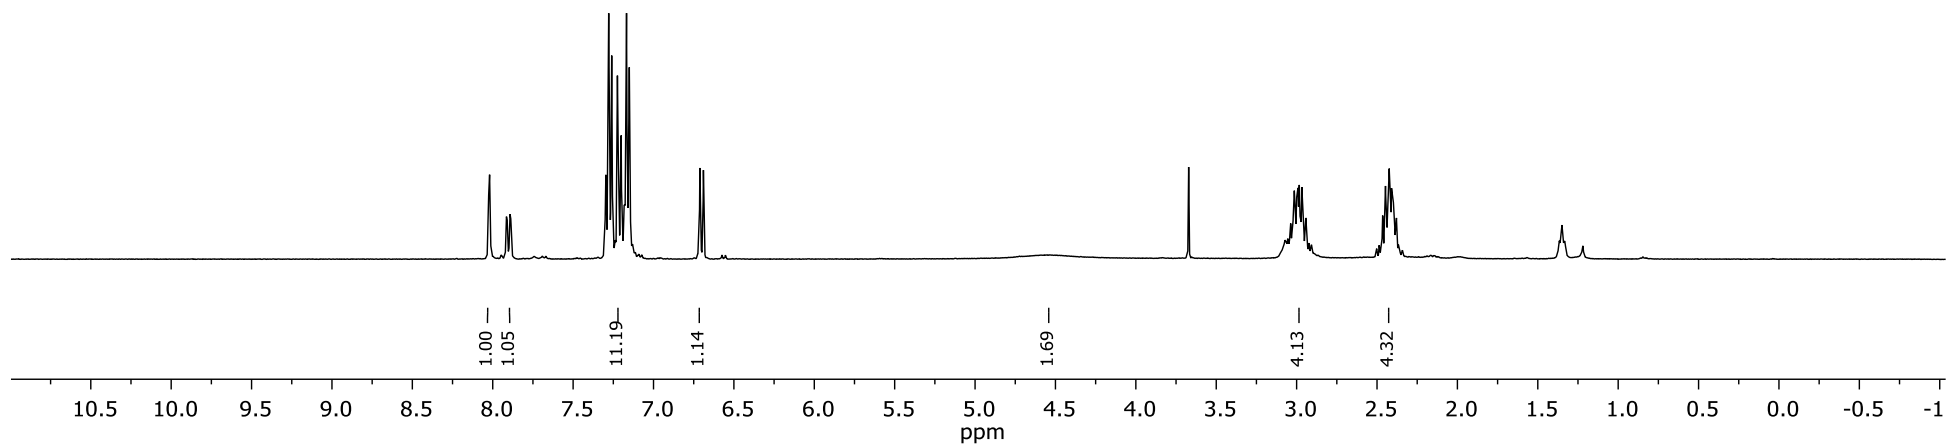



***O*-(2-amino-5-nitrophenyl) bis(2-phenylethyl)phosphinothioate (12e)**

<sup>13</sup>C\_NMR

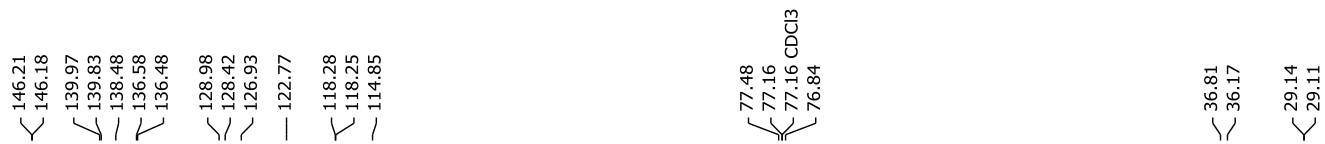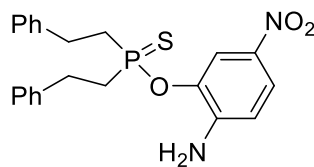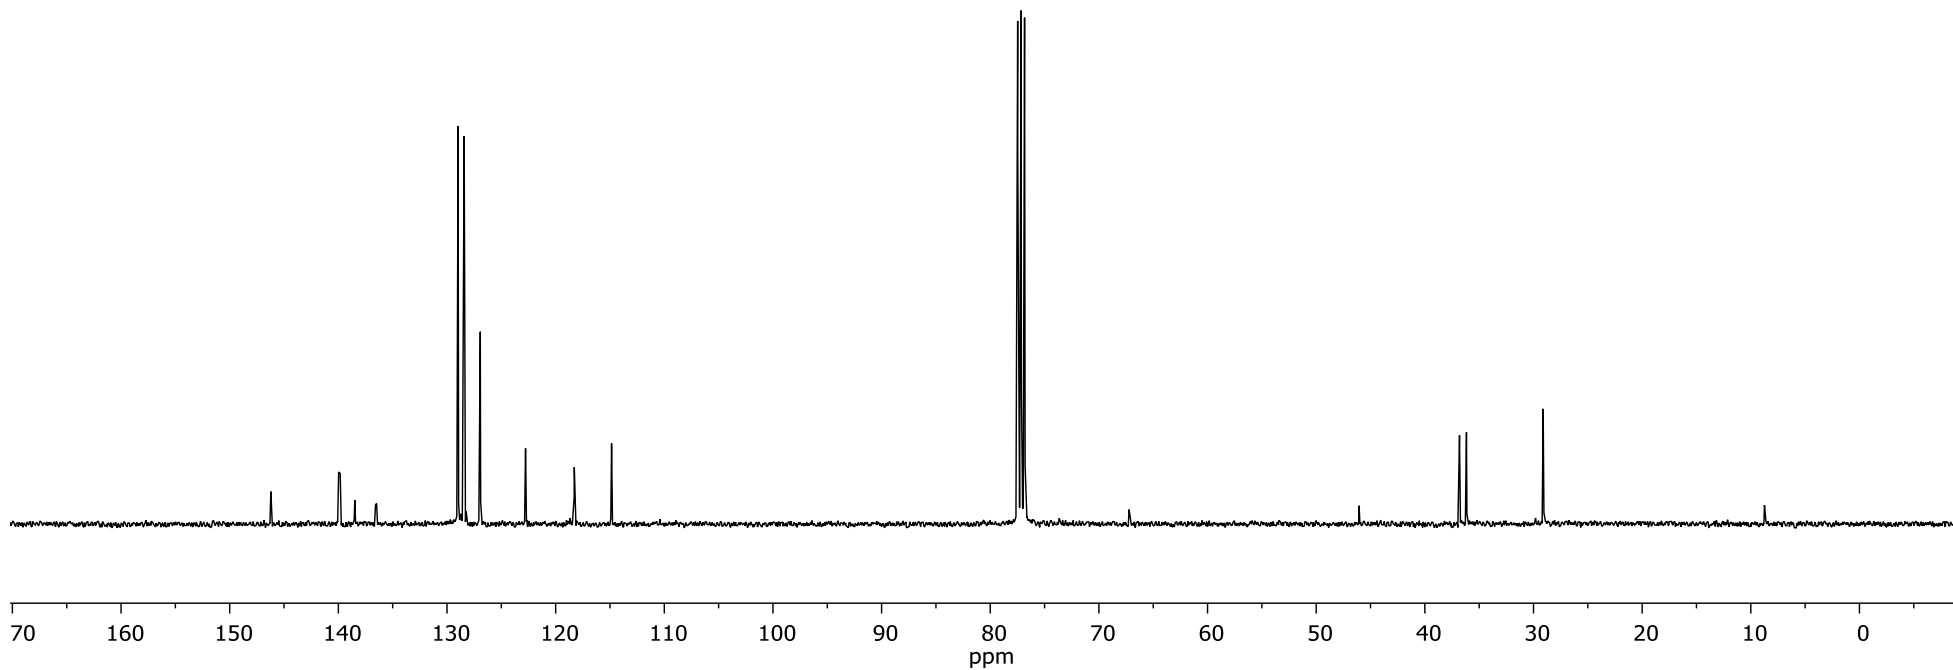

***O*-(2-amino-5-nitrophenyl) bis(2-phenylethyl)phosphinothioate (12e)**

<sup>31</sup>P\_NMR

— 108.21

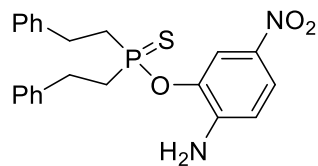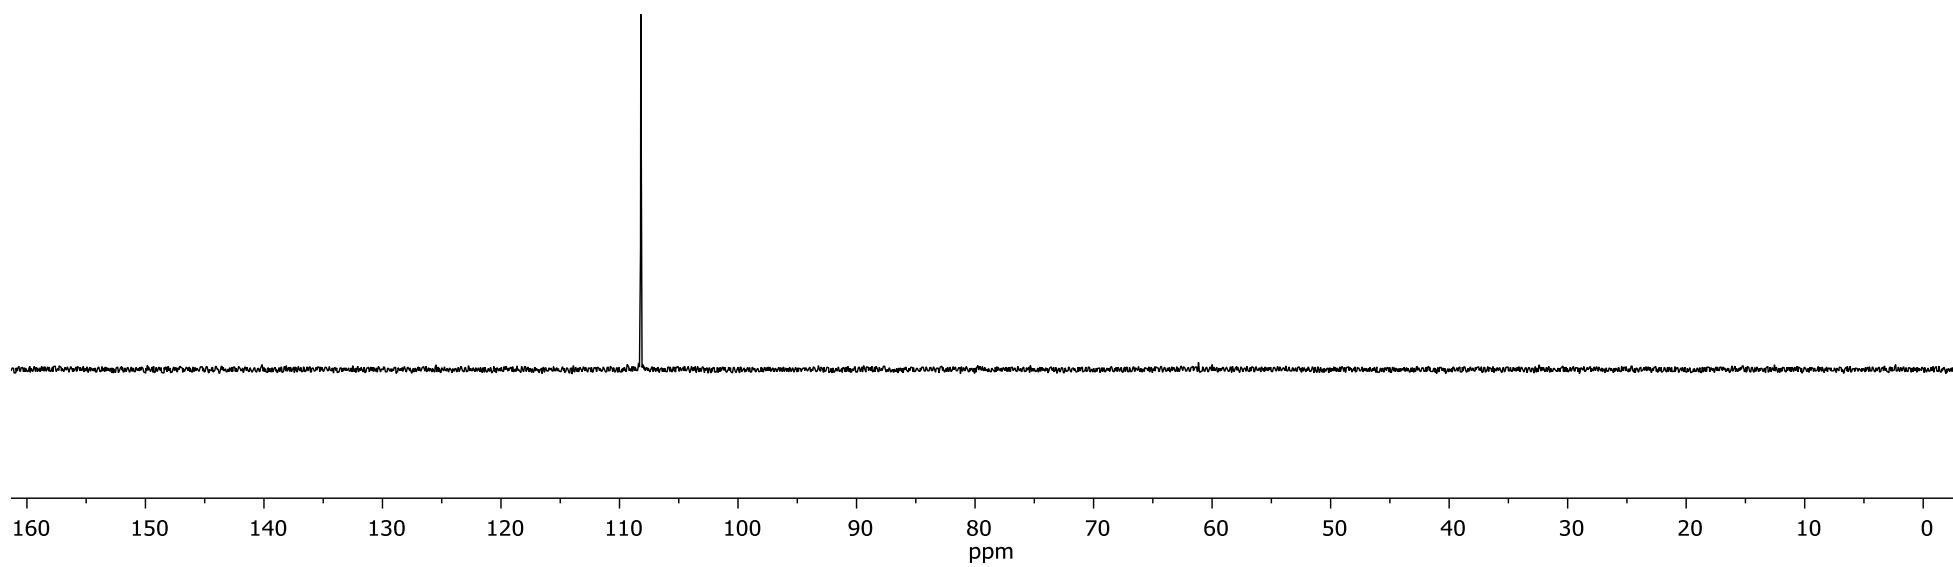

***O*-(2-amino-5-nitrophenyl) bis[2-(4-chlorophenyl)ethyl]phosphinothioate (12f)**

1H\_NMR

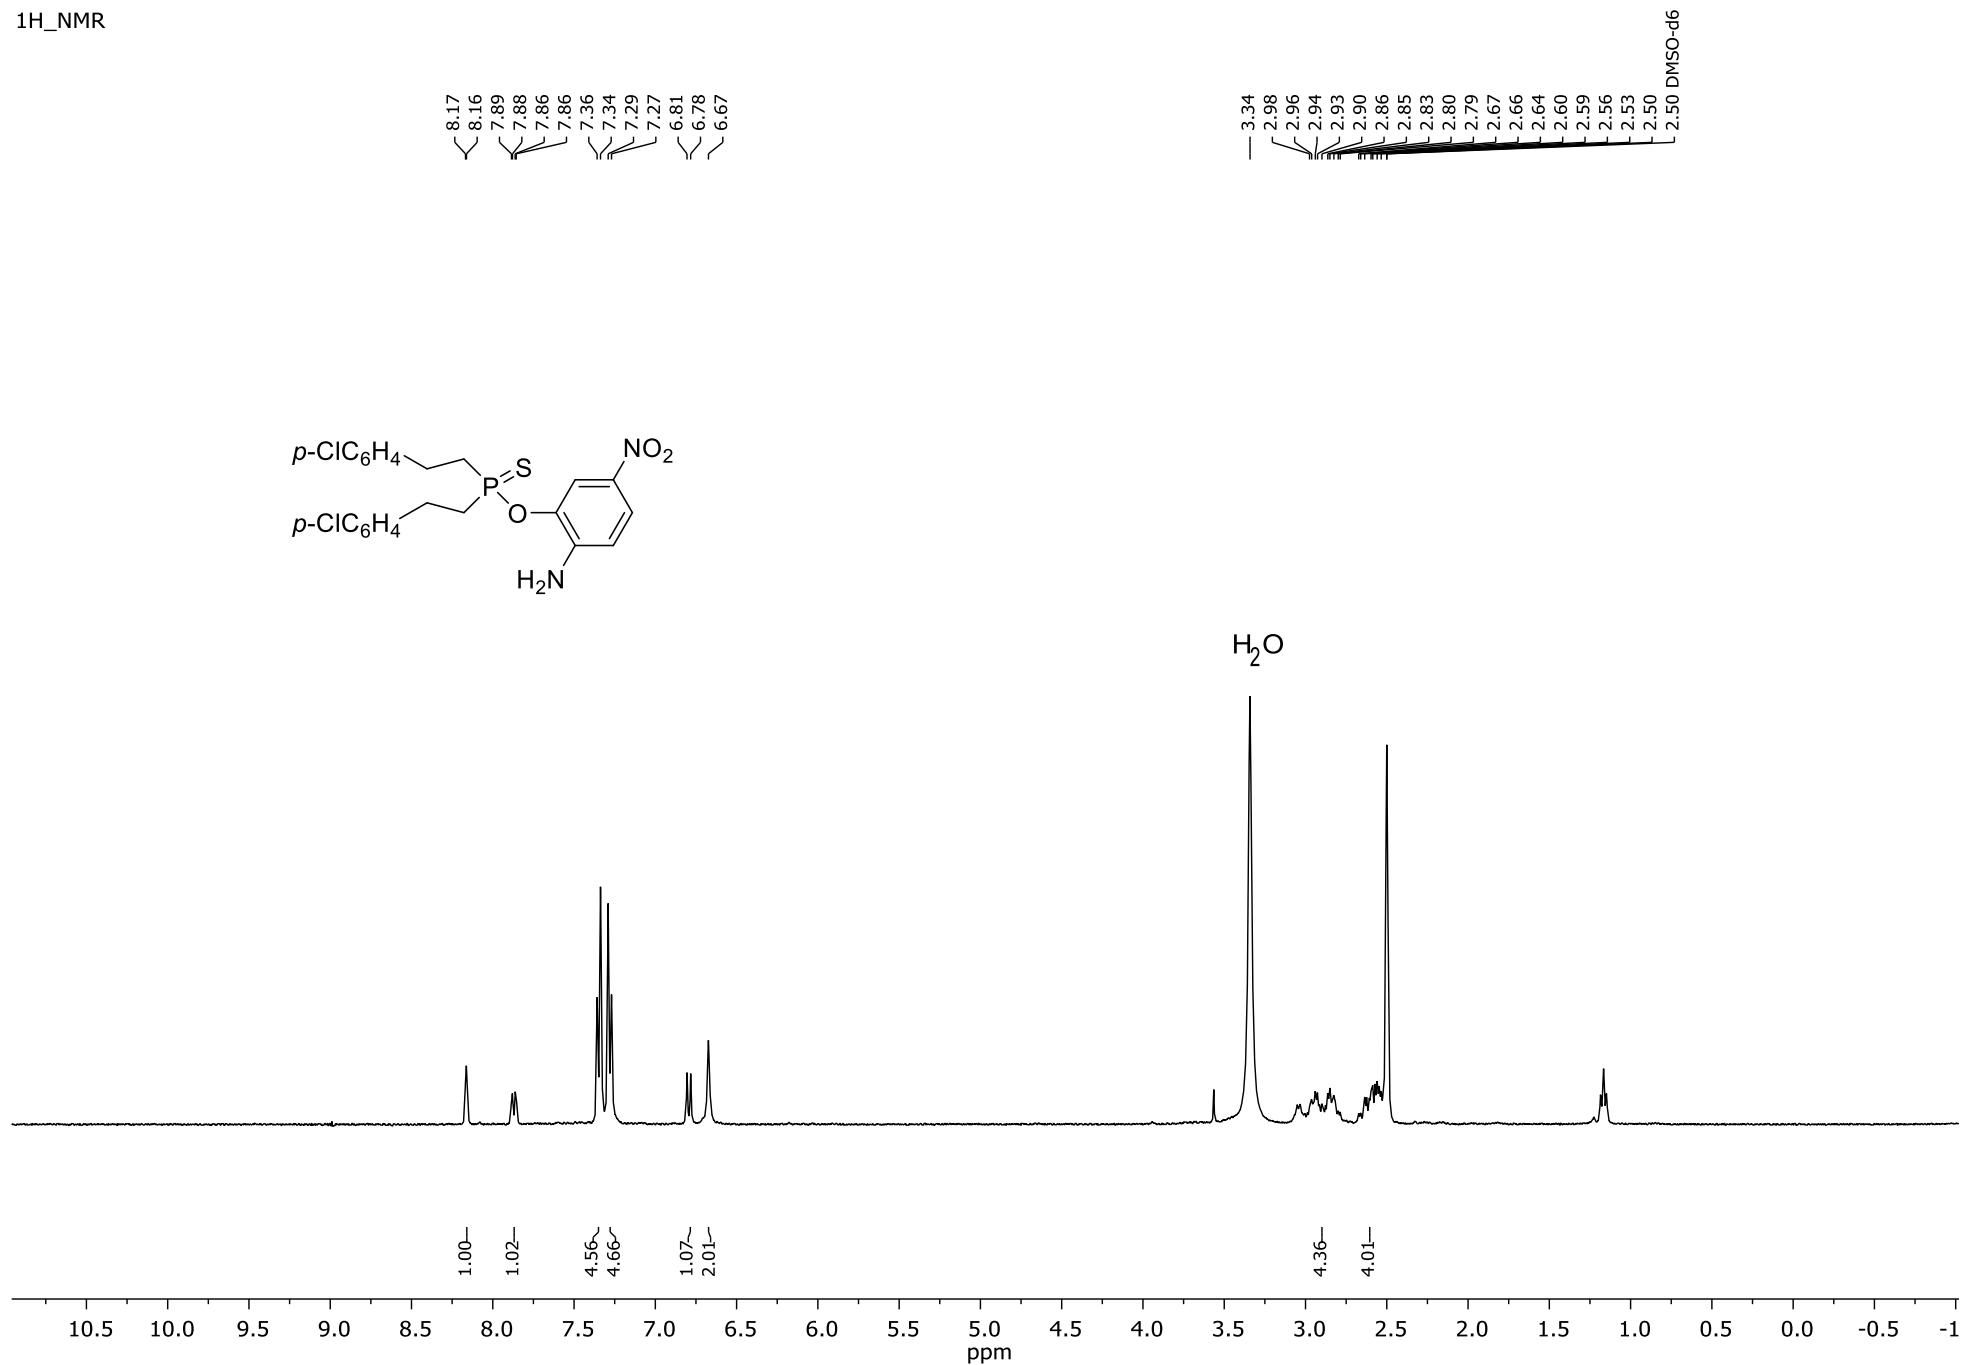

***O*-[2-amino-5-nitrophenyl] bis[2-(4-chlorophenyl)ethyl]phosphinothioate (12f)**

<sup>13</sup>C\_NMR

148.74  
148.71

140.55  
140.39  
136.34  
136.19  
136.09  
132.05  
130.80  
129.08

122.97  
118.63  
118.59  
114.26

40.55  
40.34  
40.13  
39.93  
39.72  
36.43  
35.78  
30.42  
30.23  
30.03  
29.84  
29.84 (CD<sub>3</sub>)<sub>2</sub>CO  
29.65  
29.46  
29.26  
28.42  
28.40

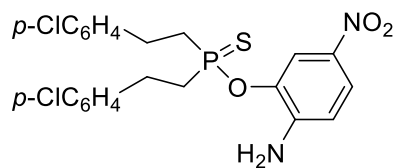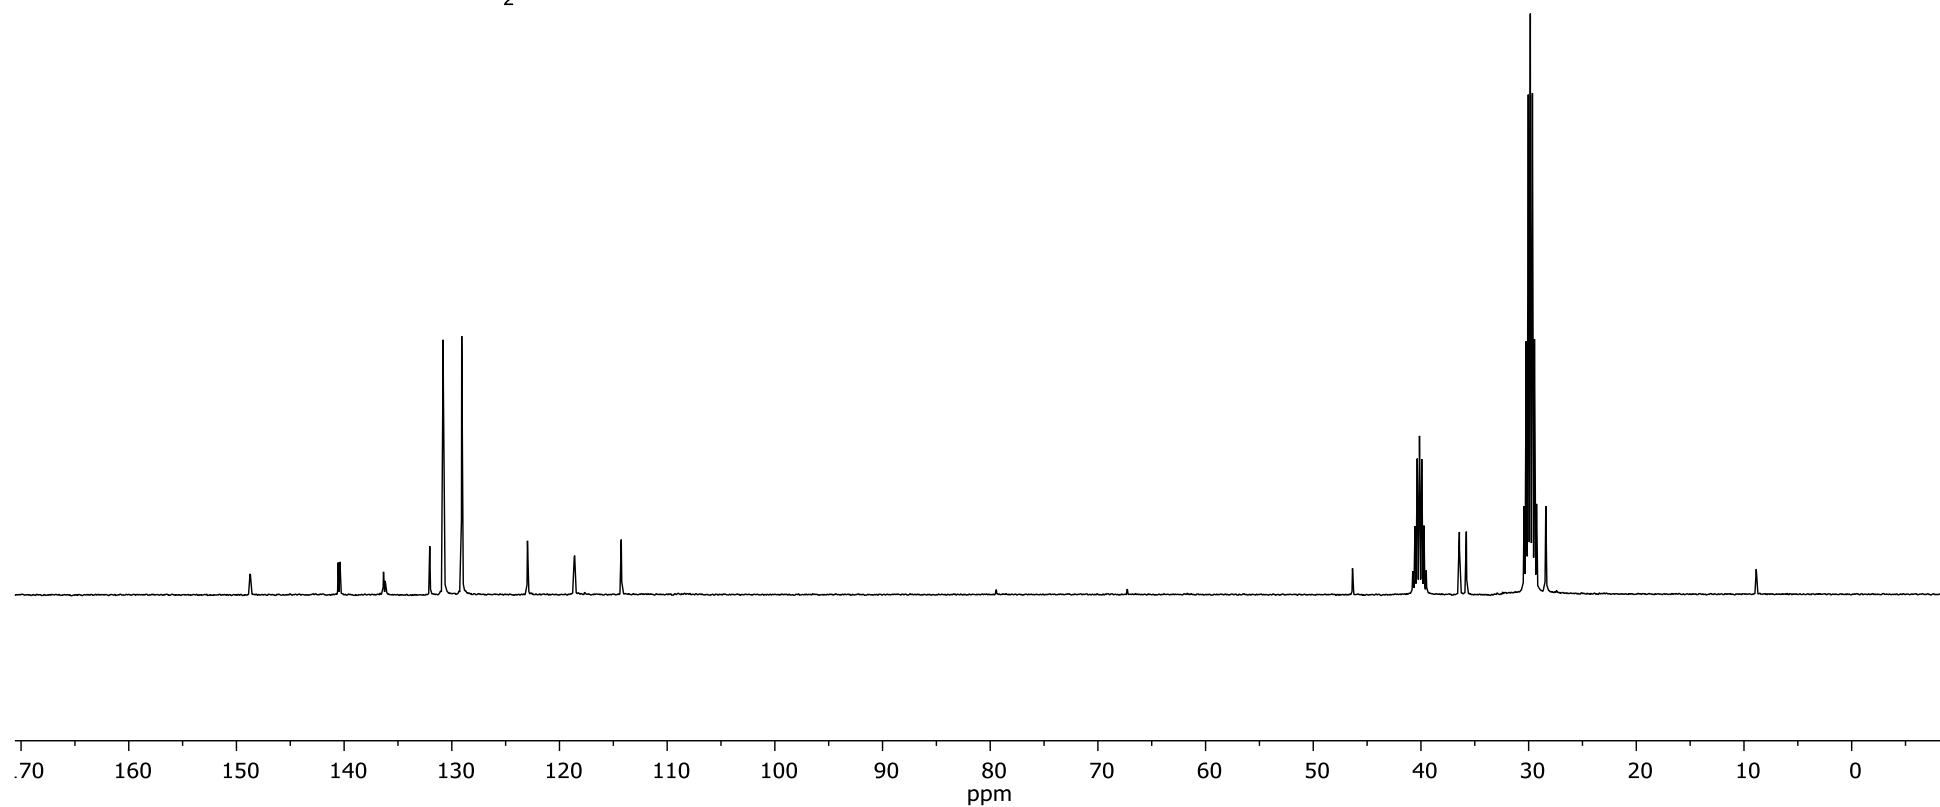

***O*-(2-amino-5-nitrophenyl) bis[2-(4-chlorophenyl)ethyl]phosphinothioate (12f)**

31P\_NMR

— 108.63

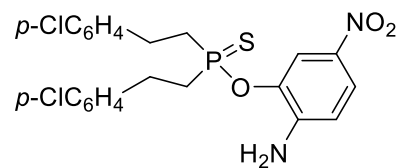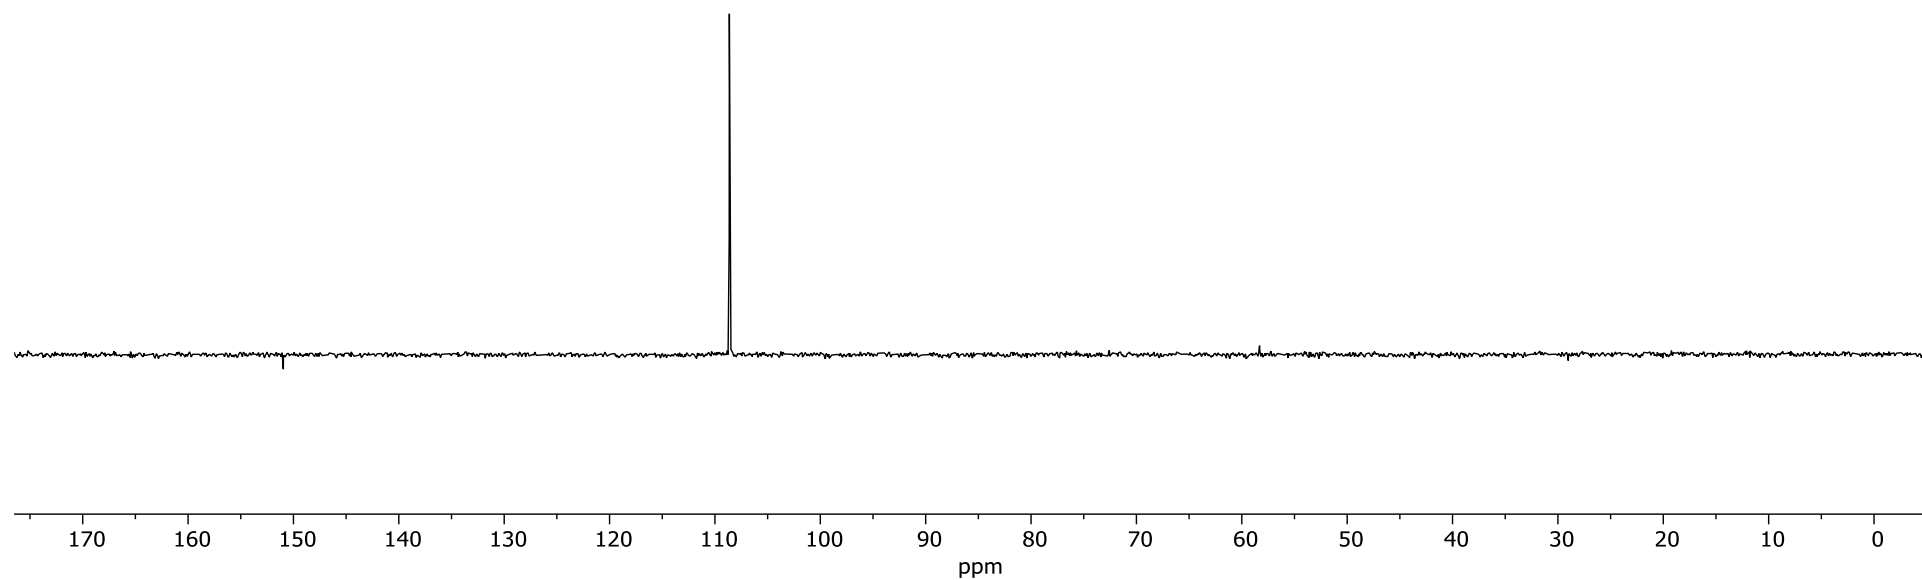

***O*-(2-amino-5-nitrophenyl) bis(2-phenylpropyl)phosphinothioate (12g)**

<sup>1</sup>H\_NMR

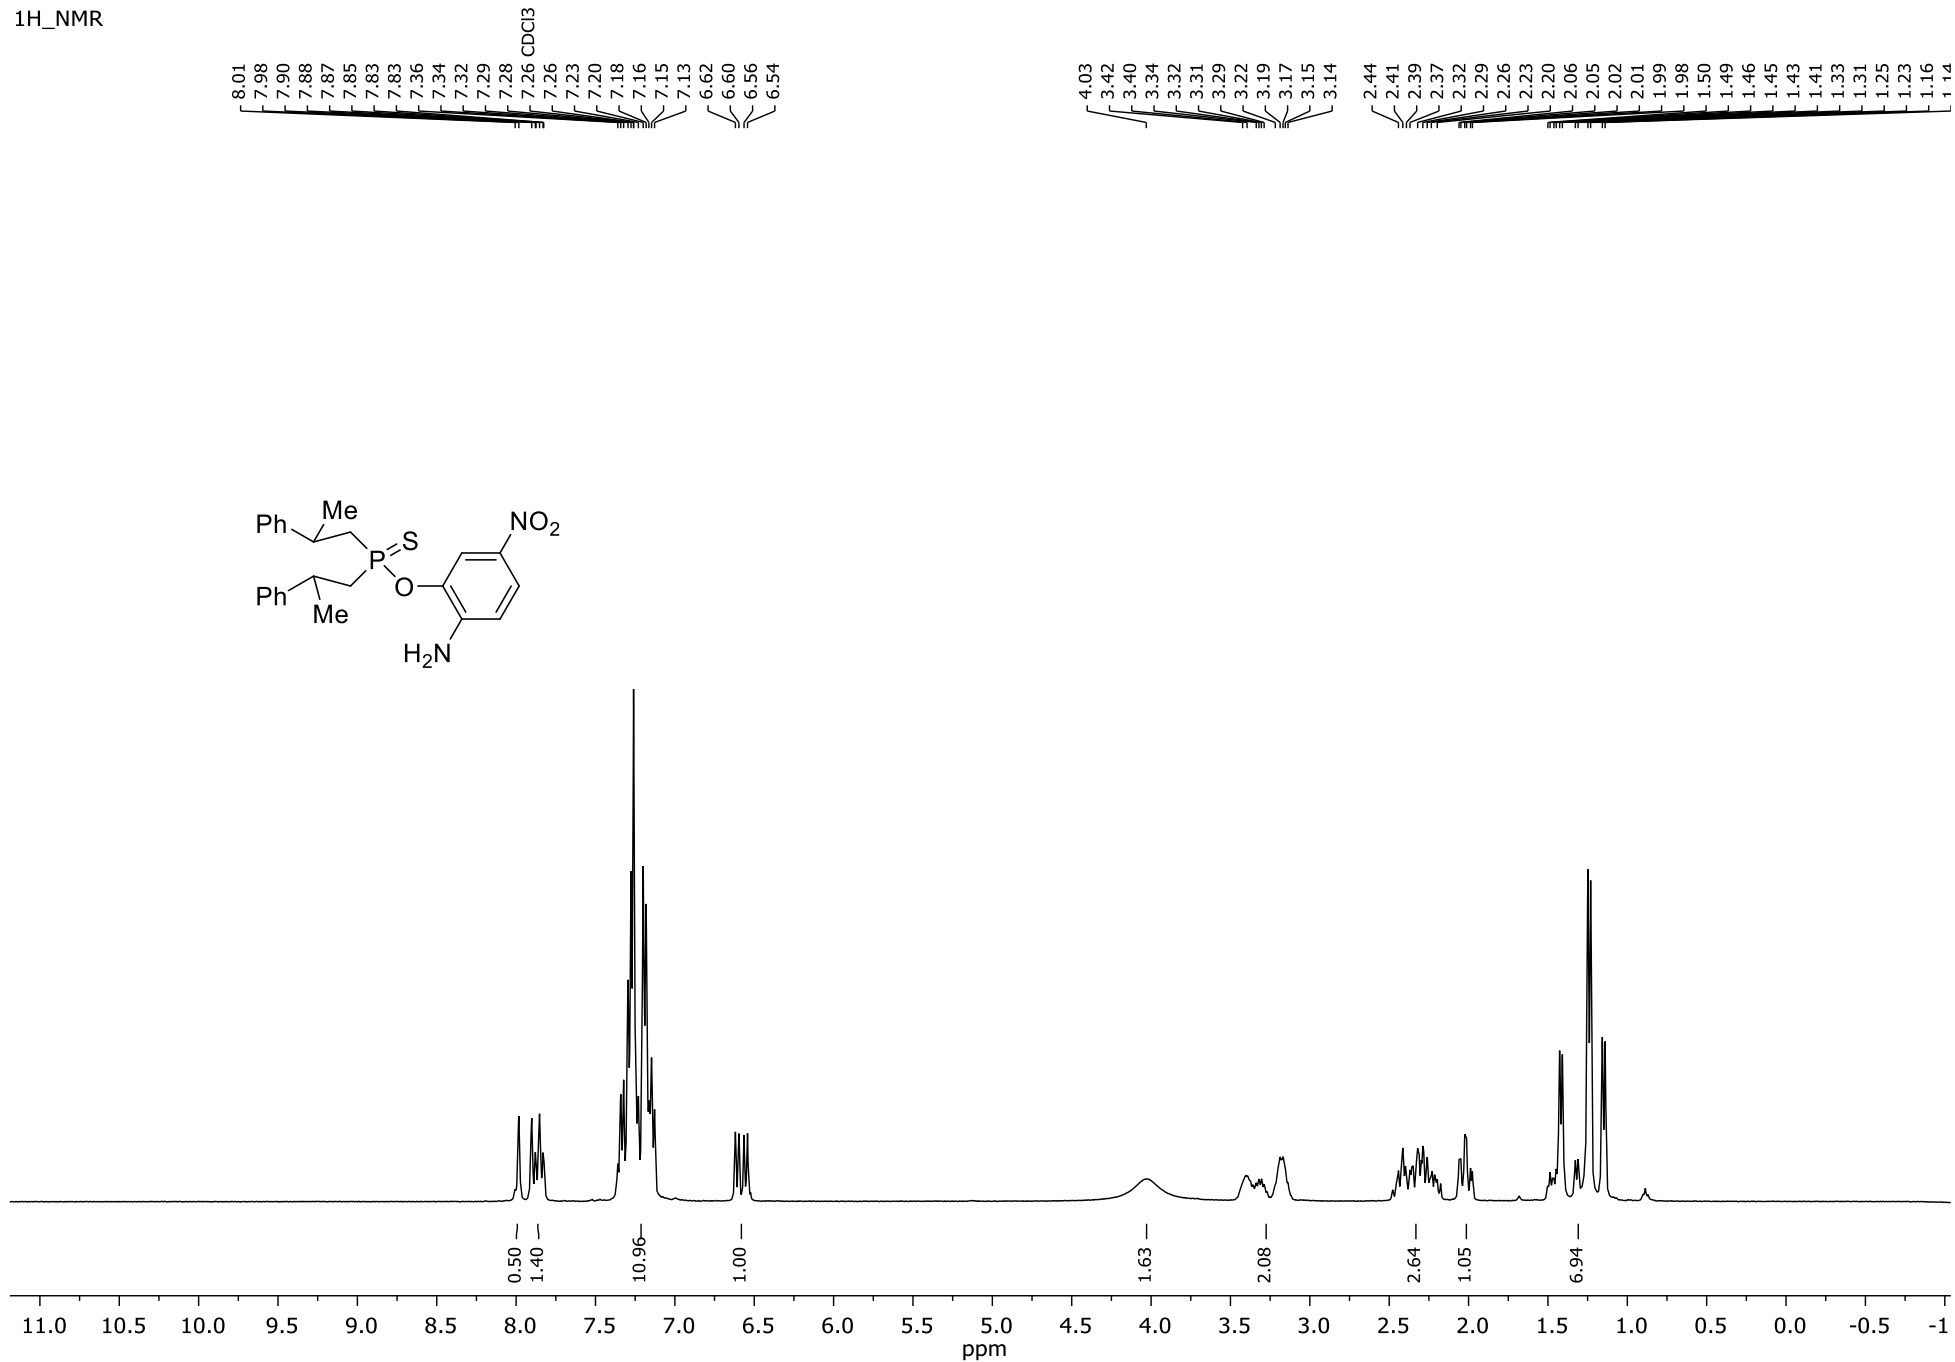

# *O*-(2-amino-5-nitrophenyl) bis(2-phenylpropyl)phosphinothioate (12g)

<sup>13</sup>C\_NMR

146.01  
145.95  
145.90  
145.86  
145.30  
145.24  
145.14  
145.10  
138.25  
138.10  
136.40  
136.30  
136.22  
136.12  
129.01  
128.91  
128.87  
127.50  
127.30  
127.22  
127.05  
126.83  
122.39  
122.37  
118.19  
118.15  
117.87  
117.83  
114.36  
114.24  
114.03

77.48  
77.16 CDCl<sub>3</sub>  
76.84

44.28  
44.06  
43.63  
43.44  
43.30  
42.67  
42.62  
41.96  
35.93  
35.62  
35.60  
35.47  
35.44  
34.84  
34.80  
25.23  
25.09  
24.93  
24.64  
24.60  
24.49  
24.46

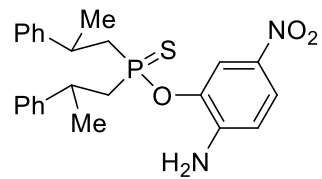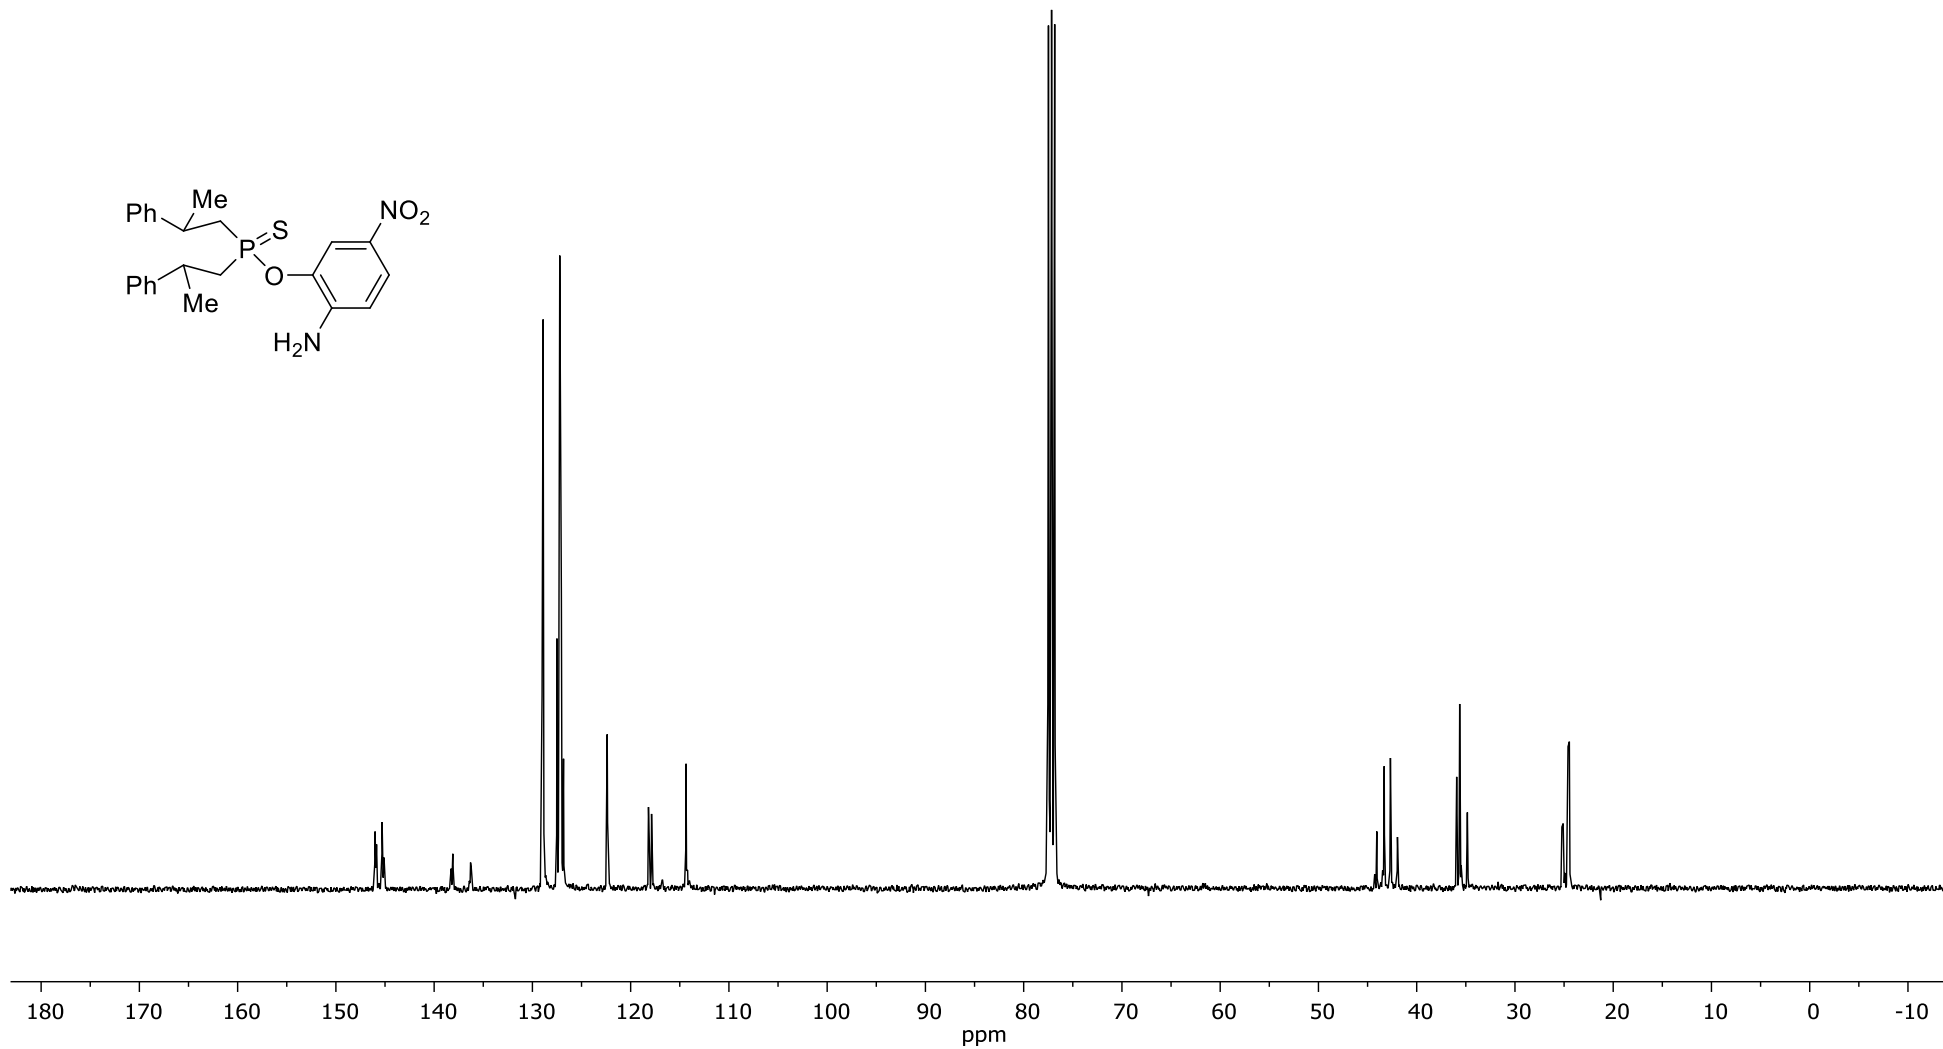

***O*-(2-amino-5-nitrophenyl) bis(2-phenylpropyl)phosphinothioate (12g)**

31P\_NMR

108.58  
107.92  
105.65

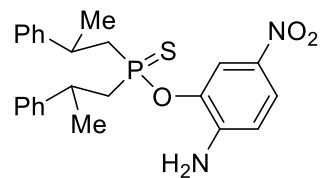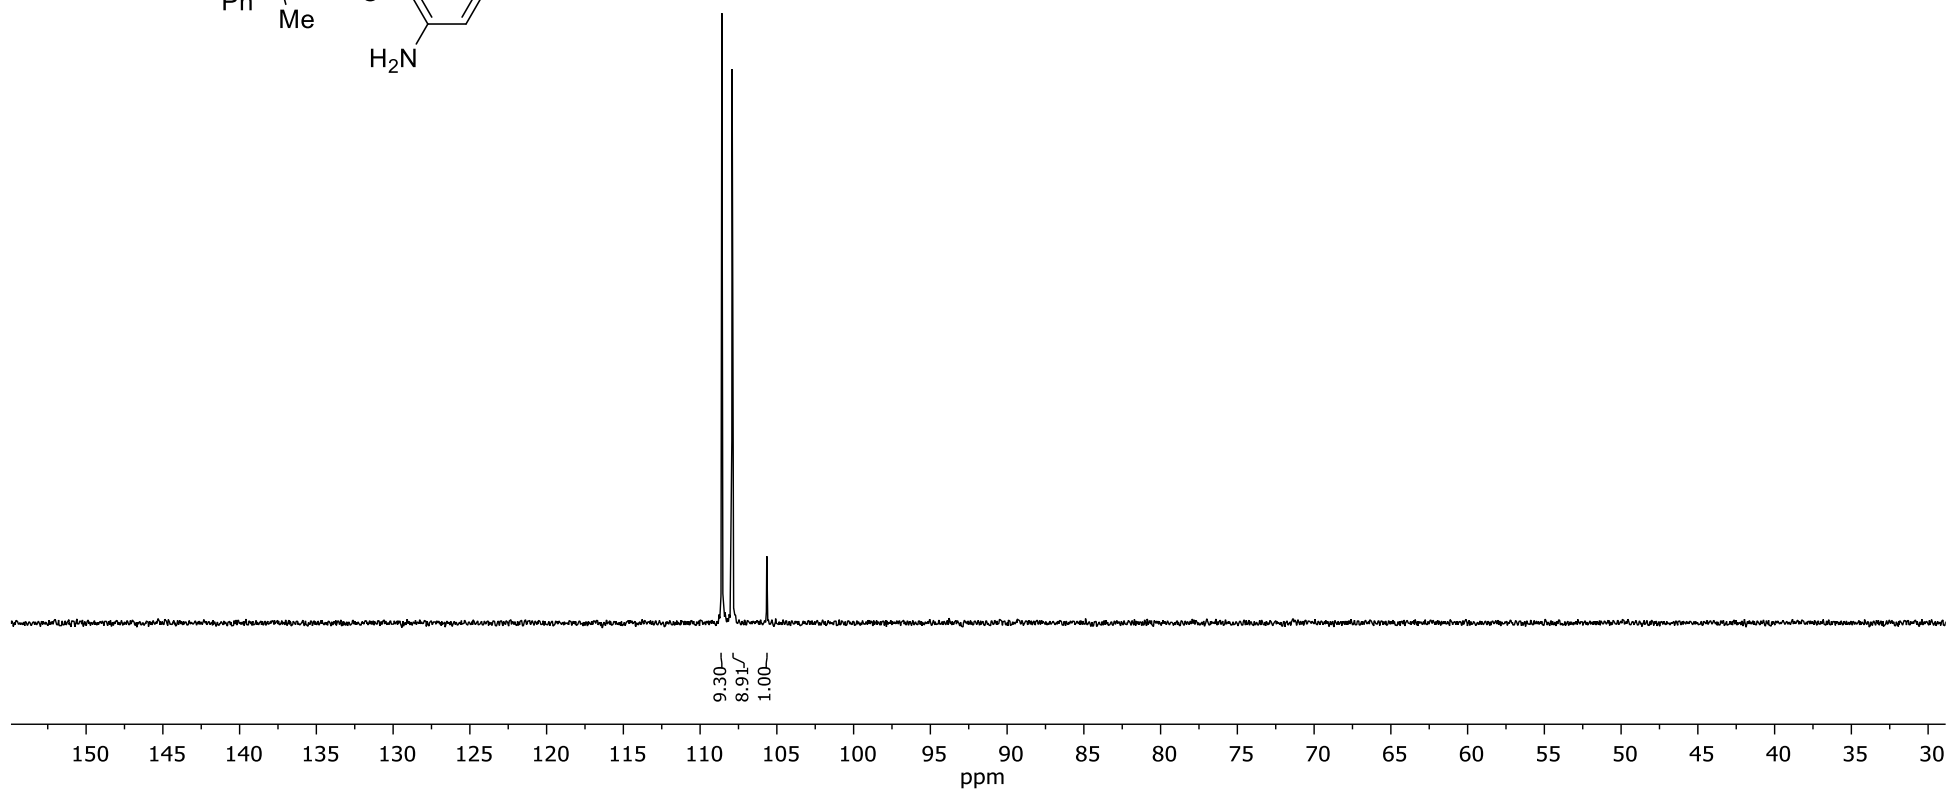



***O*-(3-aminophenyl) bis(2-phenylethyl)phosphinoselenoate (12h)**

1H\_NMR

7.36  
7.34  
7.32  
7.29  
7.28  
7.26 CDCl3  
7.24  
7.22  
7.14  
7.12  
7.10  
6.59  
6.57  
6.54  
6.52

3.89  
3.14  
3.11  
3.09  
3.07  
3.06  
3.03  
3.01  
2.98  
2.95  
2.61  
2.59  
2.57  
2.54  
2.52  
2.50  
2.49

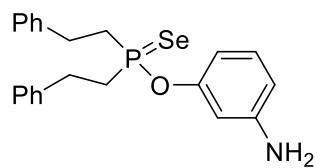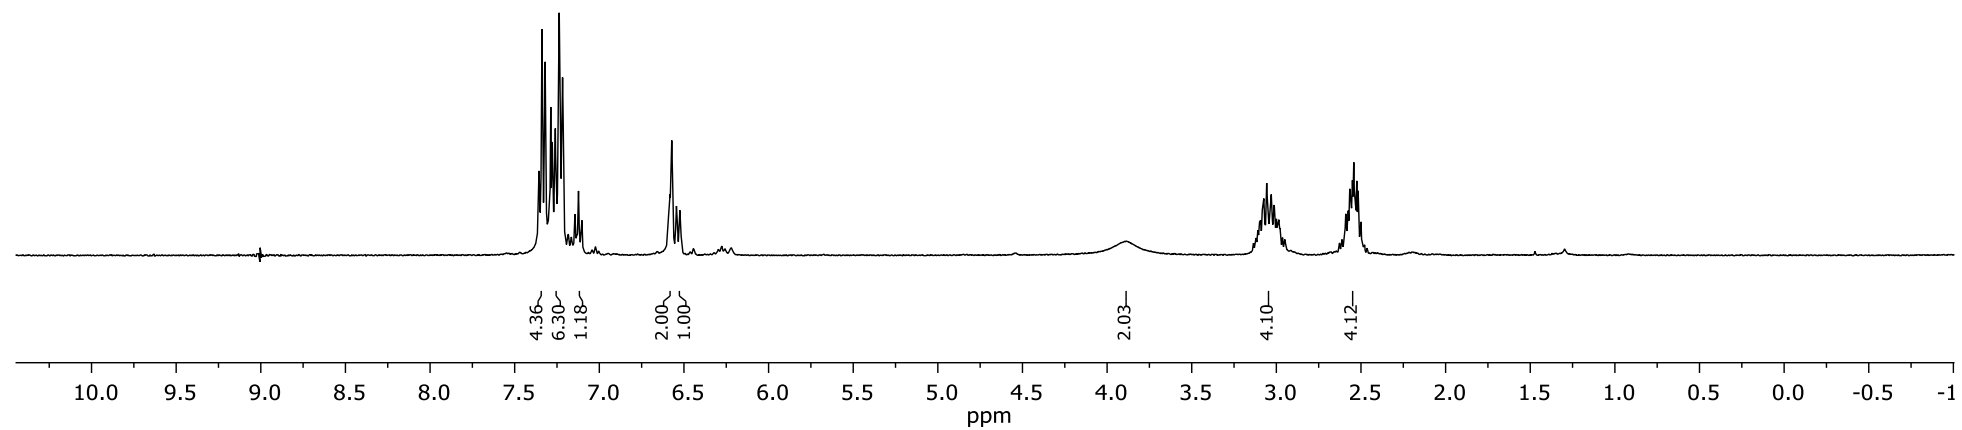

***O*-(3-aminophenyl) bis(2-phenylethyl)phosphinoselenoate (12h)**

<sup>13</sup>C\_NMR

151.92  
151.82  
147.80

140.36  
140.20

130.18  
128.83  
128.44  
126.69

112.18  
111.55  
111.50  
108.59  
108.55

77.48  
77.16 CDCl<sub>3</sub>  
76.84

37.99  
37.43

29.53  
29.50

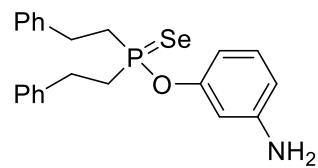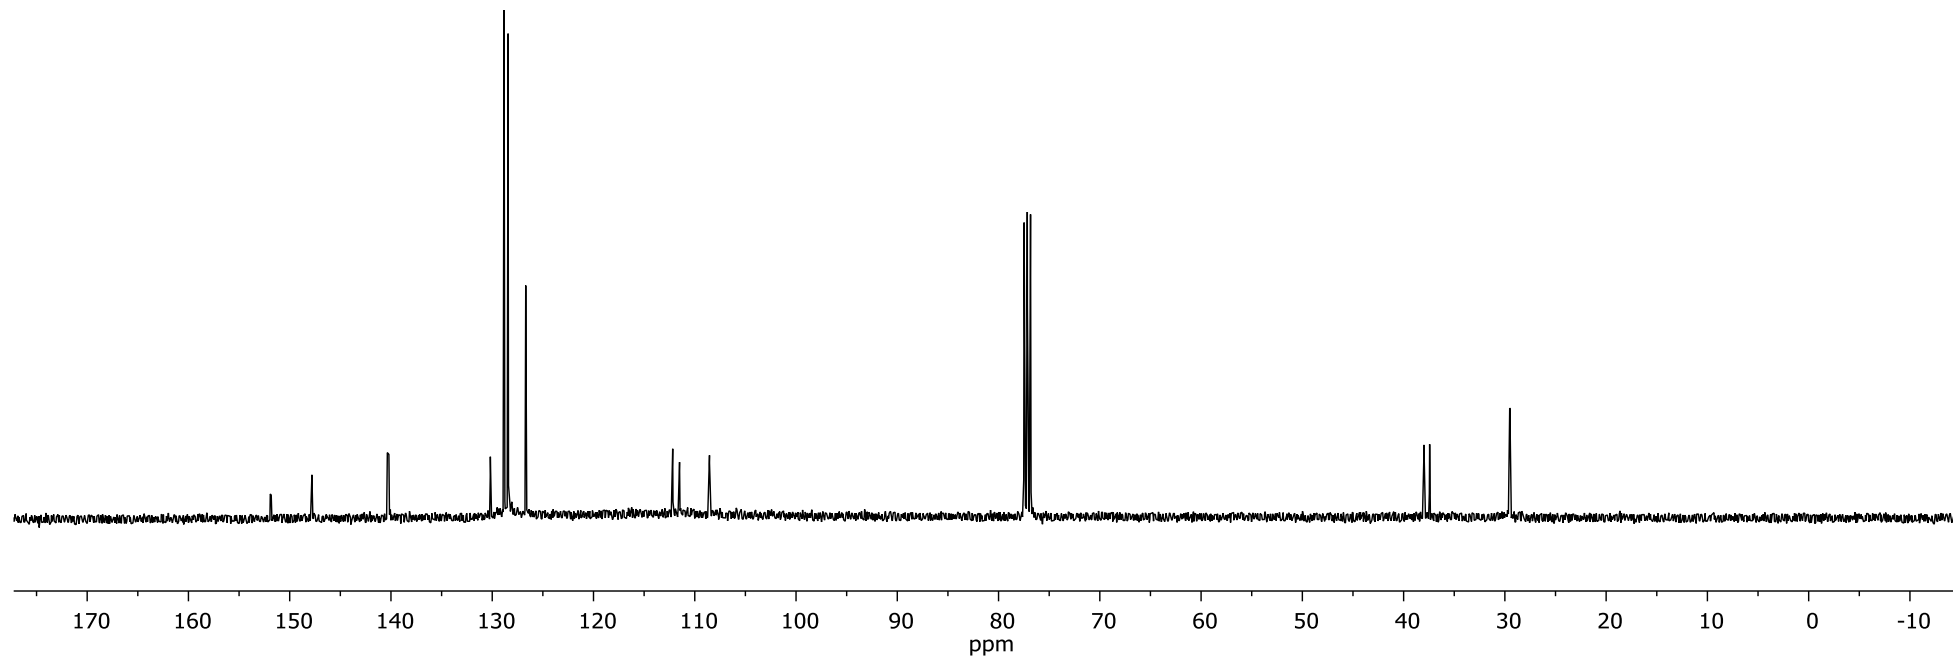

***O*-(3-aminophenyl) bis(2-phenylethyl)phosphinoselenoate (12h)**

<sup>31</sup>P\_NMR

106.31  
103.84  
101.38

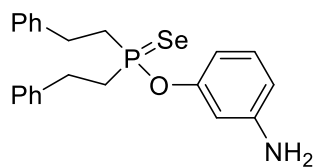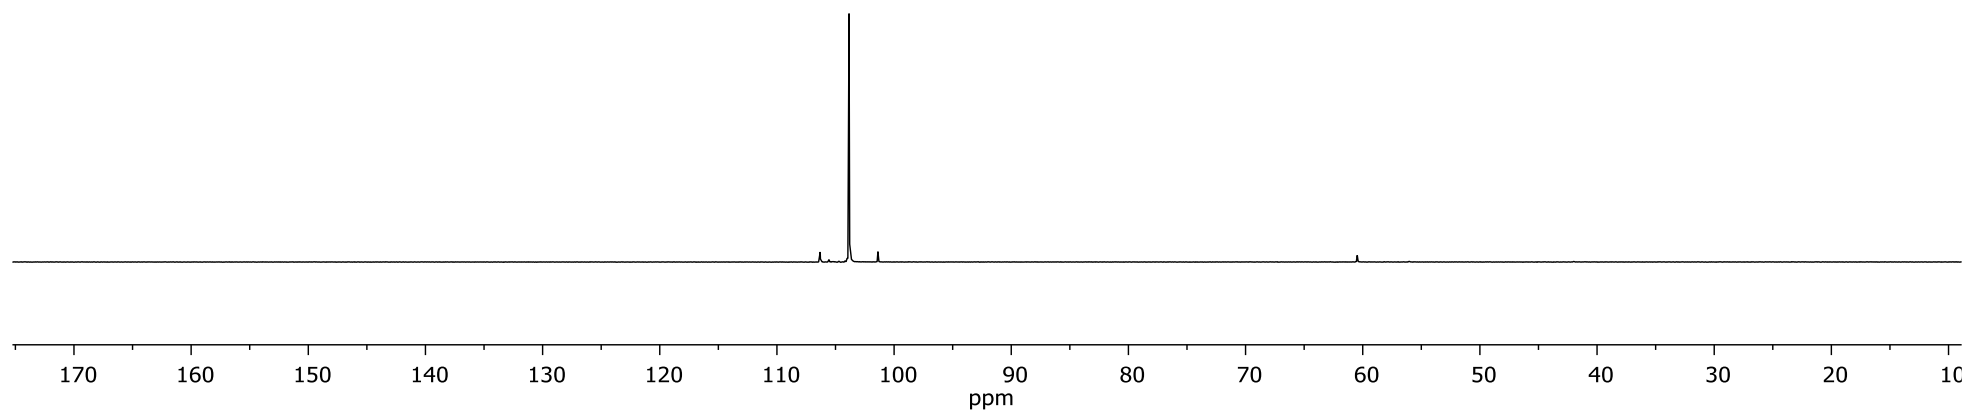

***O*-(2-aminopyridin-3-yl) bis(2-phenylethyl)phosphinoselenoate (12i)**

<sup>1</sup>H-NMR

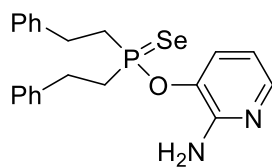

7.78  
7.77  
7.58  
7.56  
7.32  
7.30  
7.28  
7.26  
7.24  
7.22  
7.20  
7.19  
6.54  
6.53  
6.52  
6.51  
— 6.05

3.00  
2.96  
2.93  
2.91  
2.86  
2.83  
2.79  
2.75  
2.74  
2.72  
2.71  
2.68  
2.66  
2.65  
2.64  
2.50 DMSO-d6

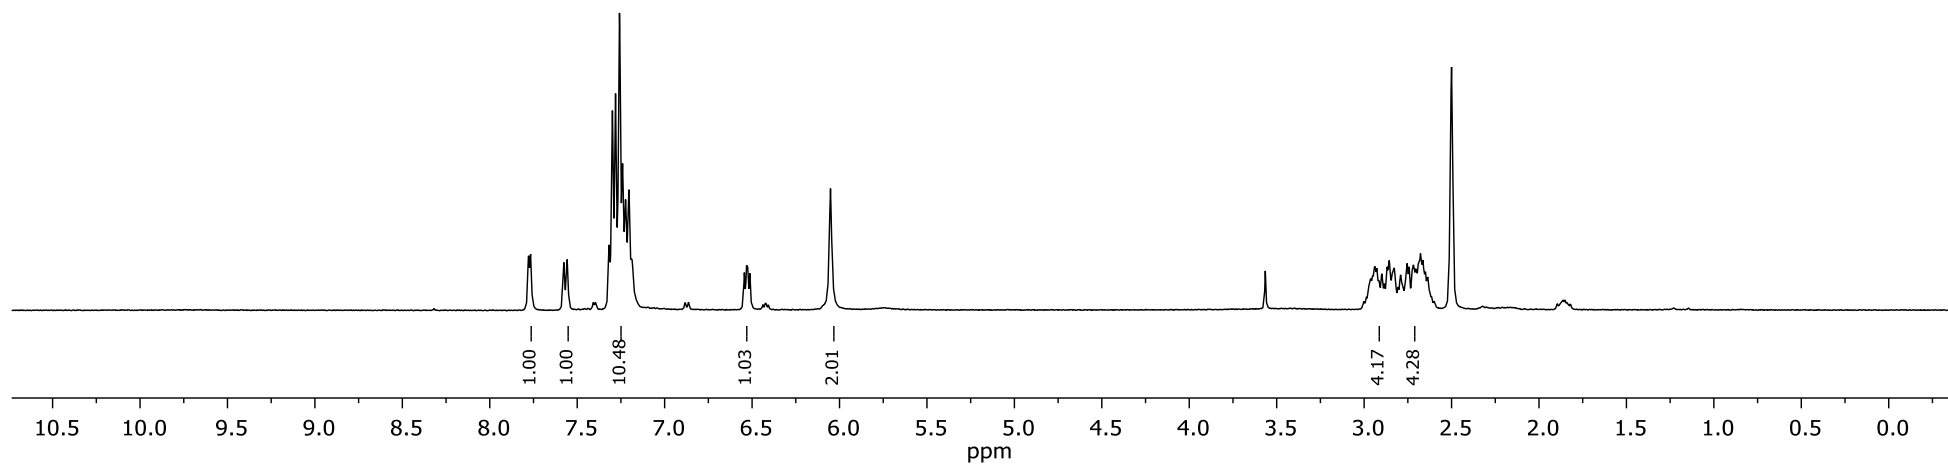

***O*-(2-aminopyridin-3-yl) bis(2-phenylethyl)phosphinoselenoate (12i)**

<sup>13</sup>C-NMR

— 152.94  
— 143.62  
— 140.51  
— 140.34  
— 132.95  
— 132.85  
— 128.46  
— 128.27  
— 127.88  
— 127.83  
— 126.27  
— 111.55

39.94  
39.73  
39.52 DMSO-d6  
39.31  
39.10  
36.48  
35.94  
28.66  
28.64

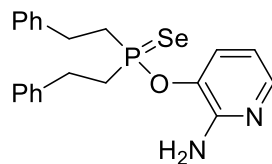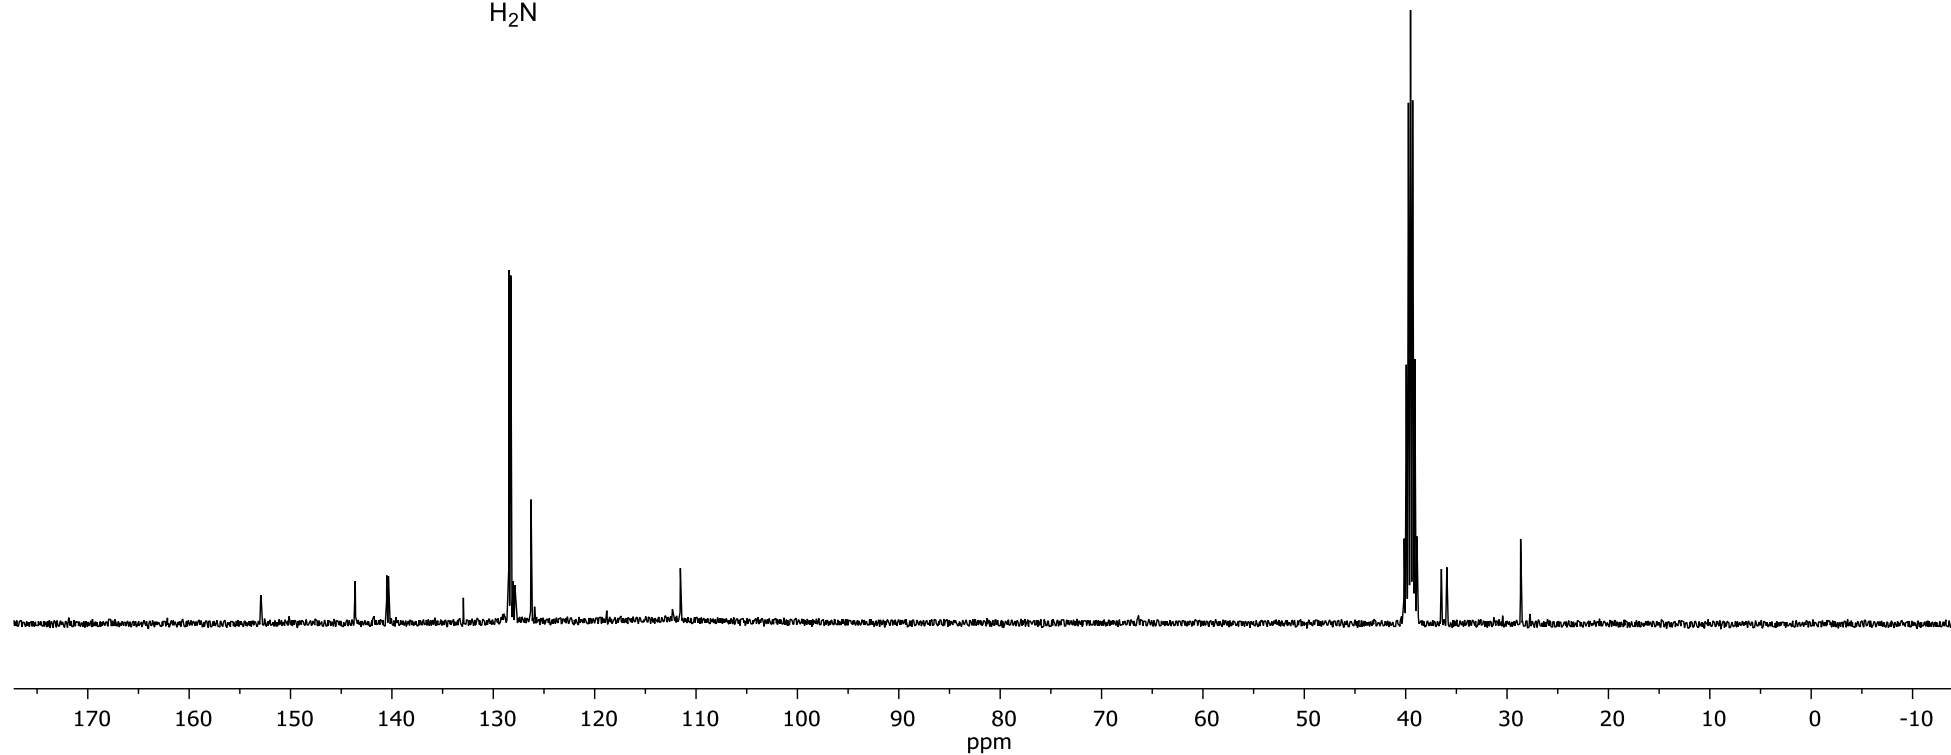

***O*-(2-aminopyridin-3-yl) bis(2-phenylethyl)phosphinoselenoate (12i)**

31P\_NMR

113.67  
111.18  
108.70

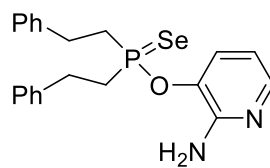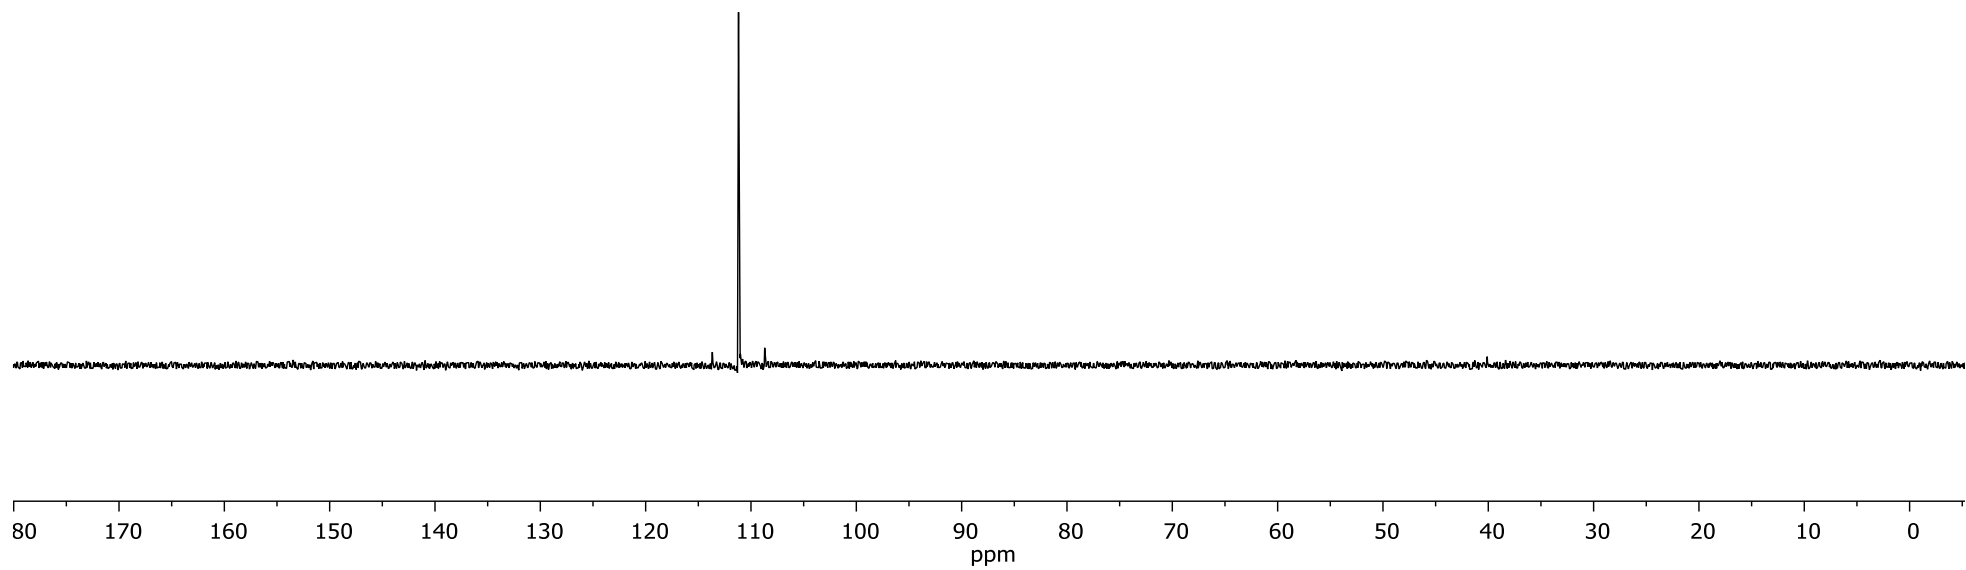

***O*-(2-amino-5-nitrophenyl) bis(2-phenylethyl)phosphinoselenoate (12j)**

1H\_NMR

8.06  
8.05  
8.05  
7.96  
7.96  
7.96  
7.94  
7.94  
7.93  
7.93  
7.34  
7.32  
7.30  
7.26 CDCl3  
7.24  
7.22  
7.22  
7.20  
6.75  
6.72

3.29  
3.09  
3.07  
3.07  
3.05  
3.04  
3.02  
3.02  
3.01  
2.99  
2.63  
2.62  
2.61  
2.61  
2.60  
2.59  
2.58  
2.57  
2.56  
2.55

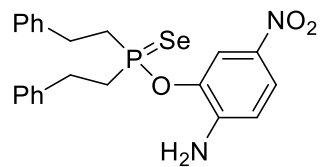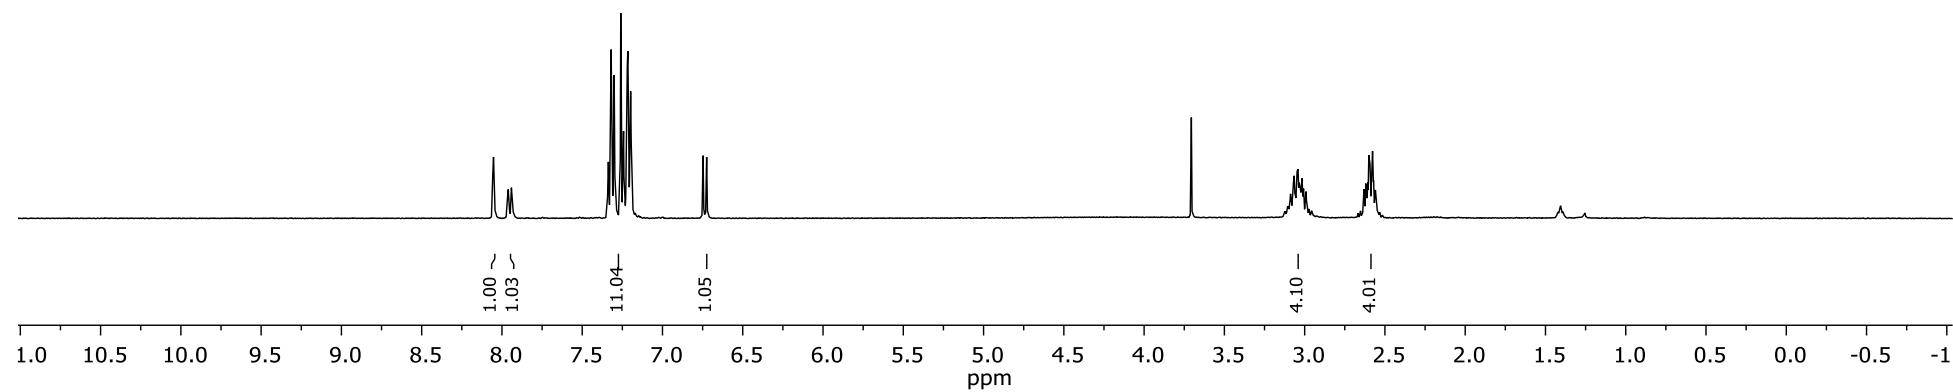

***O*-(2-amino-5-nitrophenyl) bis(2-phenylethyl)phosphinoselenoate (12j)**

<sup>13</sup>C\_NMR

146.21  
146.18  
139.73  
139.58  
138.49  
136.77  
136.67  
129.01  
128.48  
127.00  
— 122.86  
118.34  
118.30  
114.94

77.48  
77.16 CDCl<sub>3</sub>  
77.16  
76.84

38.12  
37.59

29.67  
29.65

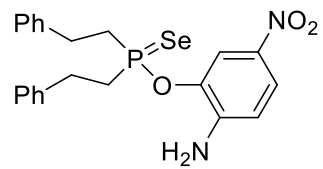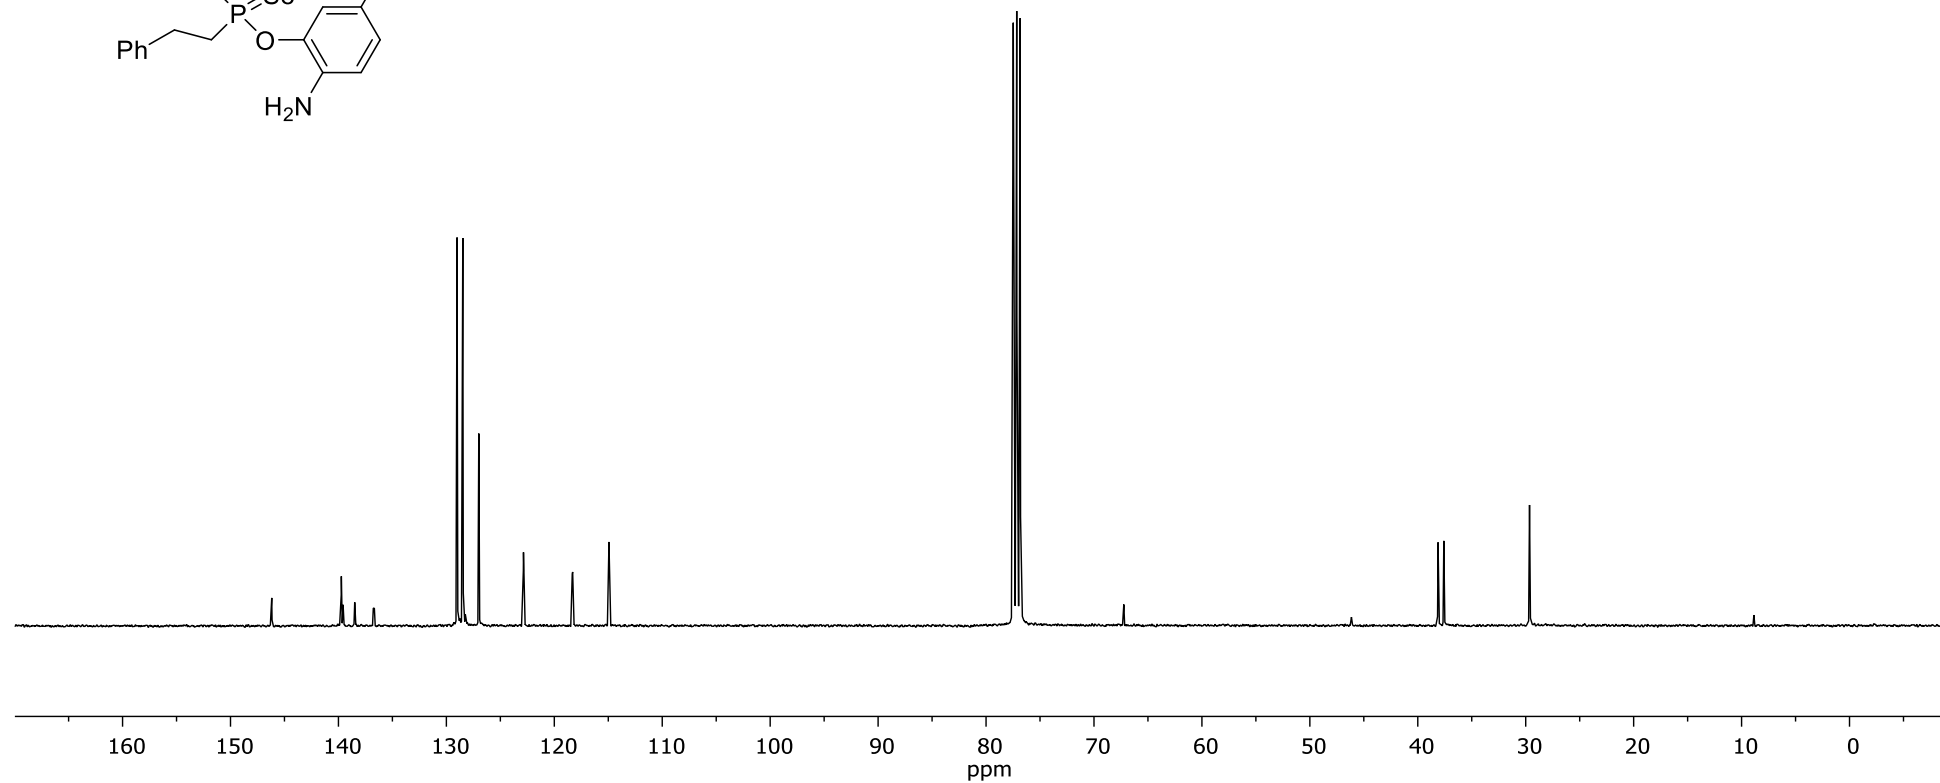



***O*-(2-amino-5-nitrophenyl) bis(2-phenylethyl)phosphinoselenoate (12j)**

31P\_NMR

— 108.29

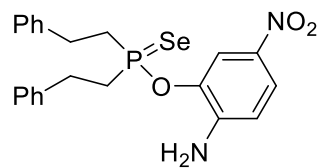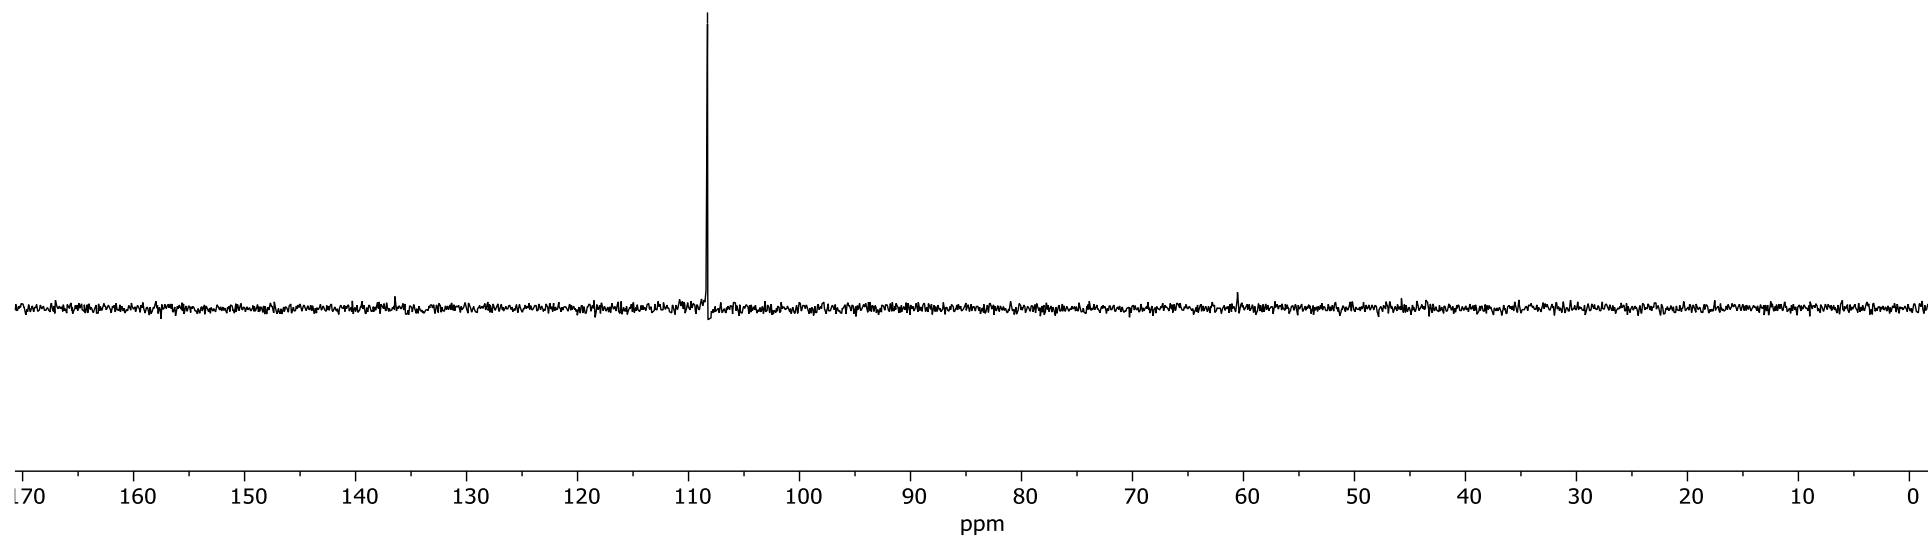

# *O*-(2-amino-5-nitrophenyl) bis(2-phenylpropyl)phosphinoselenoate (12k)

1H\_NMR

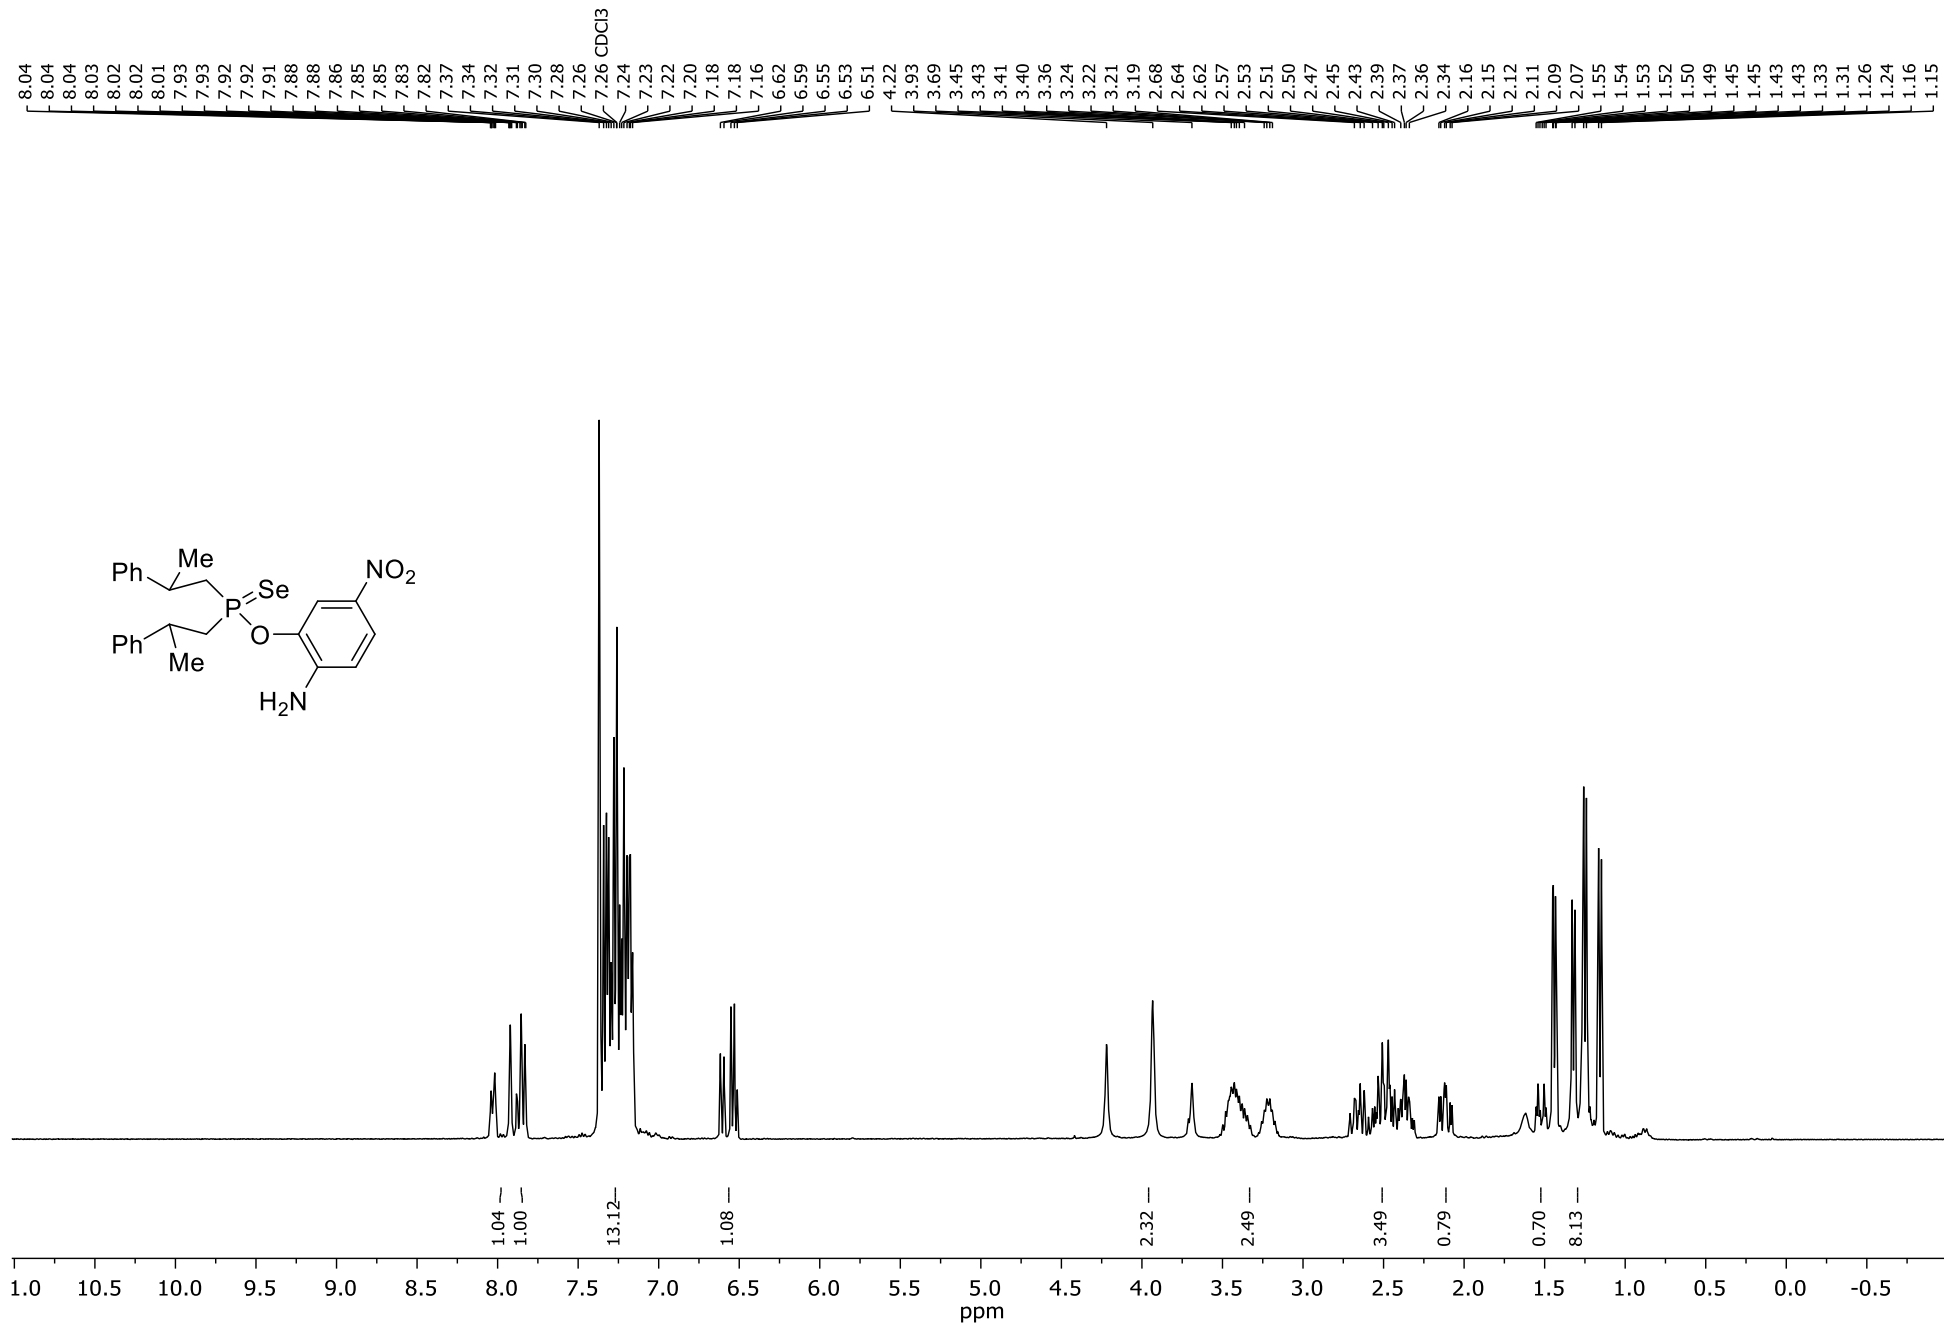

***O*-(2-amino-5-nitrophenyl) bis(2-phenylpropyl)phosphinoselenoate (12k)**

<sup>13</sup>C\_NMR

146.03  
146.00  
145.91  
145.88  
145.79  
145.74  
145.65  
145.59  
145.12  
145.06  
144.94  
144.90  
138.06  
137.89  
136.50  
136.40  
136.31  
136.21  
129.06  
128.98  
128.89  
128.44  
127.52  
127.40  
127.38  
127.22  
127.11  
127.06  
126.86  
122.41  
122.24  
118.11  
118.07  
117.79  
117.75  
116.65  
116.60  
114.35  
114.19  
113.97

77.48  
77.16 CDCl<sub>3</sub>  
76.84

45.37  
45.19  
44.83  
44.67  
44.42  
43.90  
43.42  
42.86  
36.34  
36.09  
36.05  
35.48  
35.44  
25.31  
25.16  
25.09  
24.95  
24.61  
24.51  
24.46  
24.37

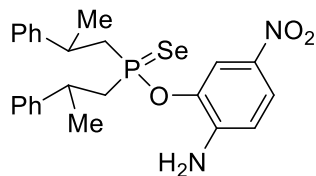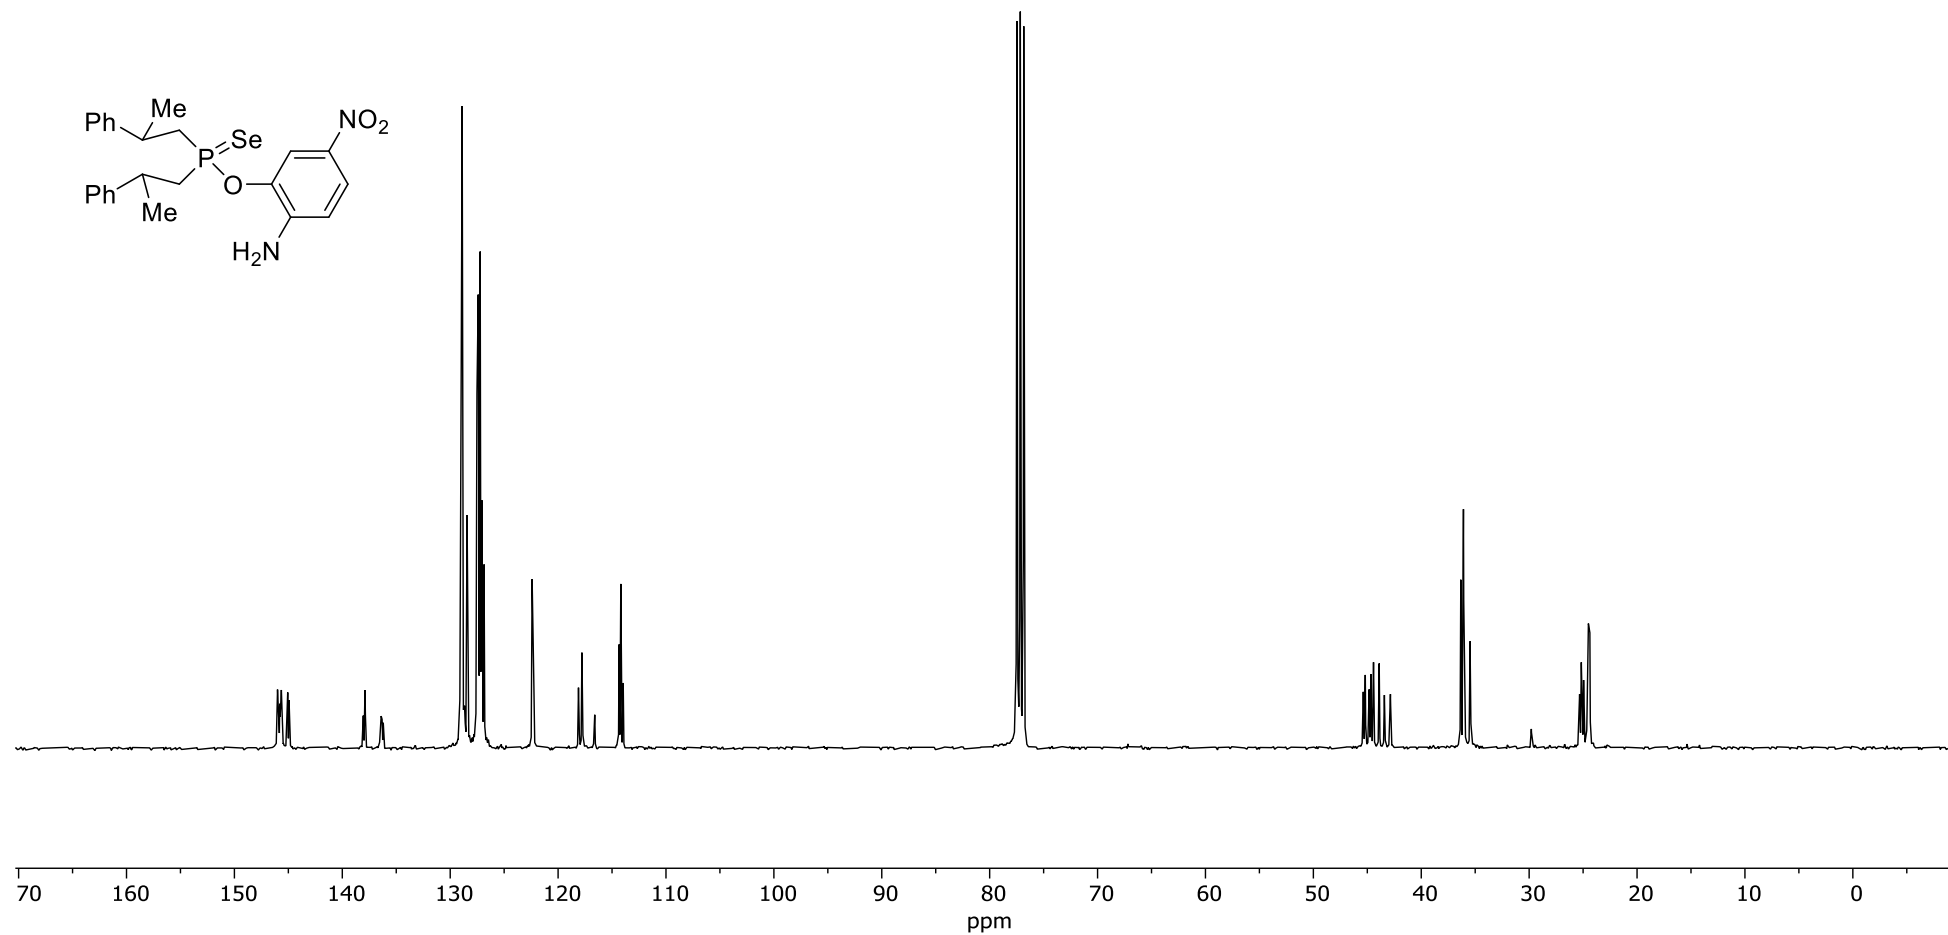

***O*-(2-amino-5-nitrophenyl) bis(2-phenylpropyl)phosphinoselenoate (12k)**

31P\_NMR

110.03  
109.71  
106.20

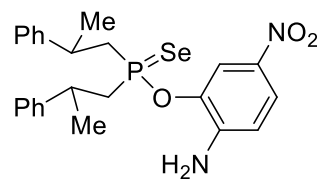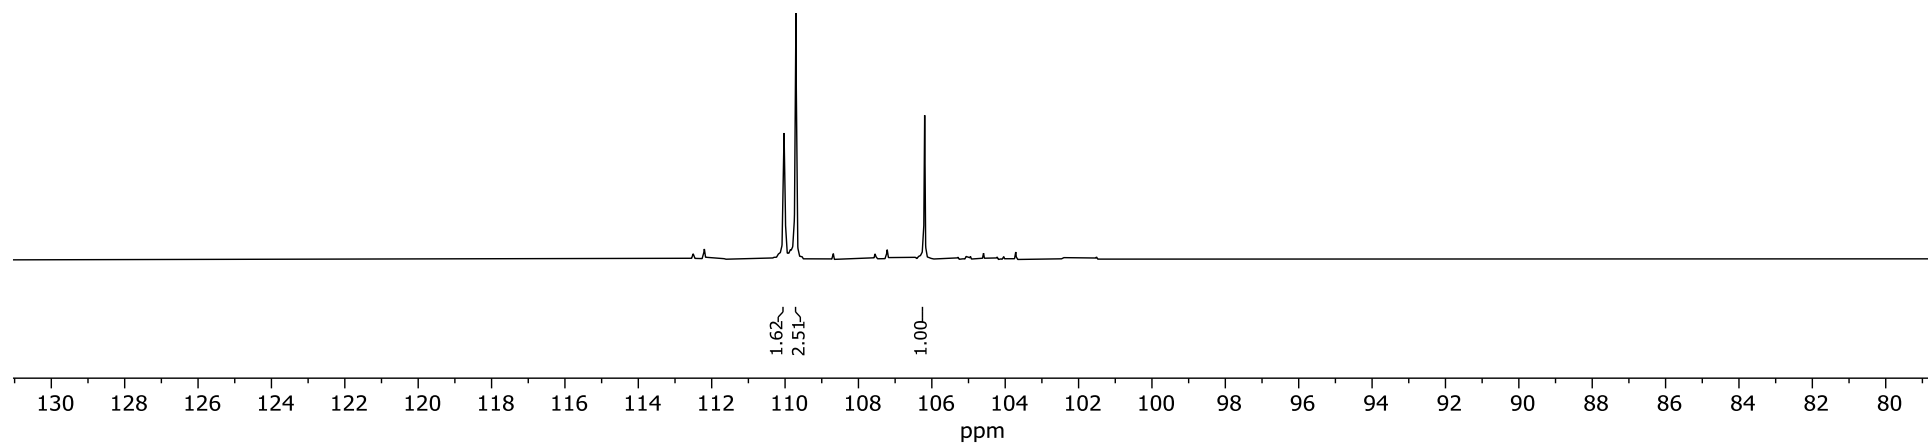

1-[[bis(2-phenylethyl)phosphoroselenoyl]oxy]-2,2,6,6-tetramethylpiperidine (S1).

<sup>13</sup>C\_NMR

141.49  
141.34

129.92  
129.34  
127.69

62.50  
62.48

48.04

41.35  
38.19  
37.65

30.99

15.60  
11.68

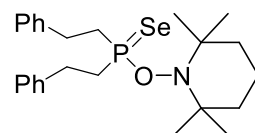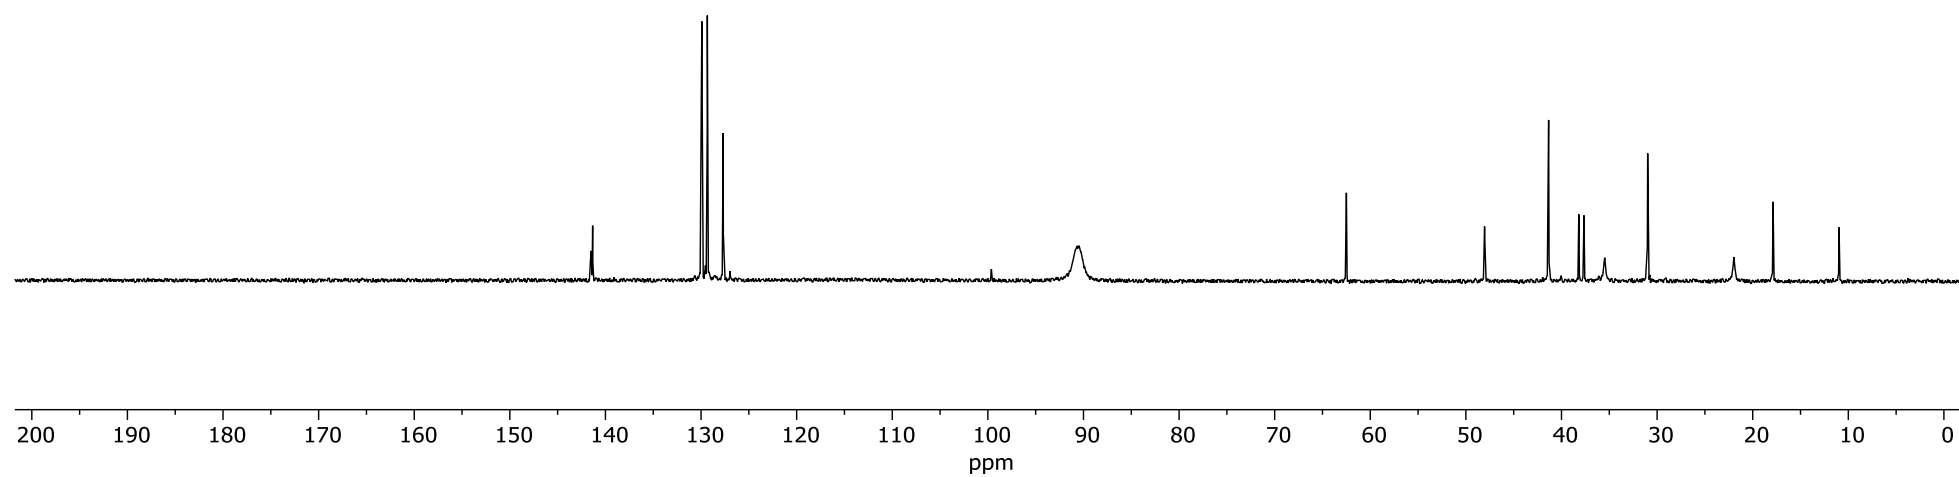

1-[[bis(2-phenylethyl)phosphoroselenoyl]oxy]-2,2,6,6-tetramethylpiperidine (S1).

<sup>31</sup>P-NMR

115.40  
112.96  
110.53

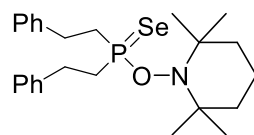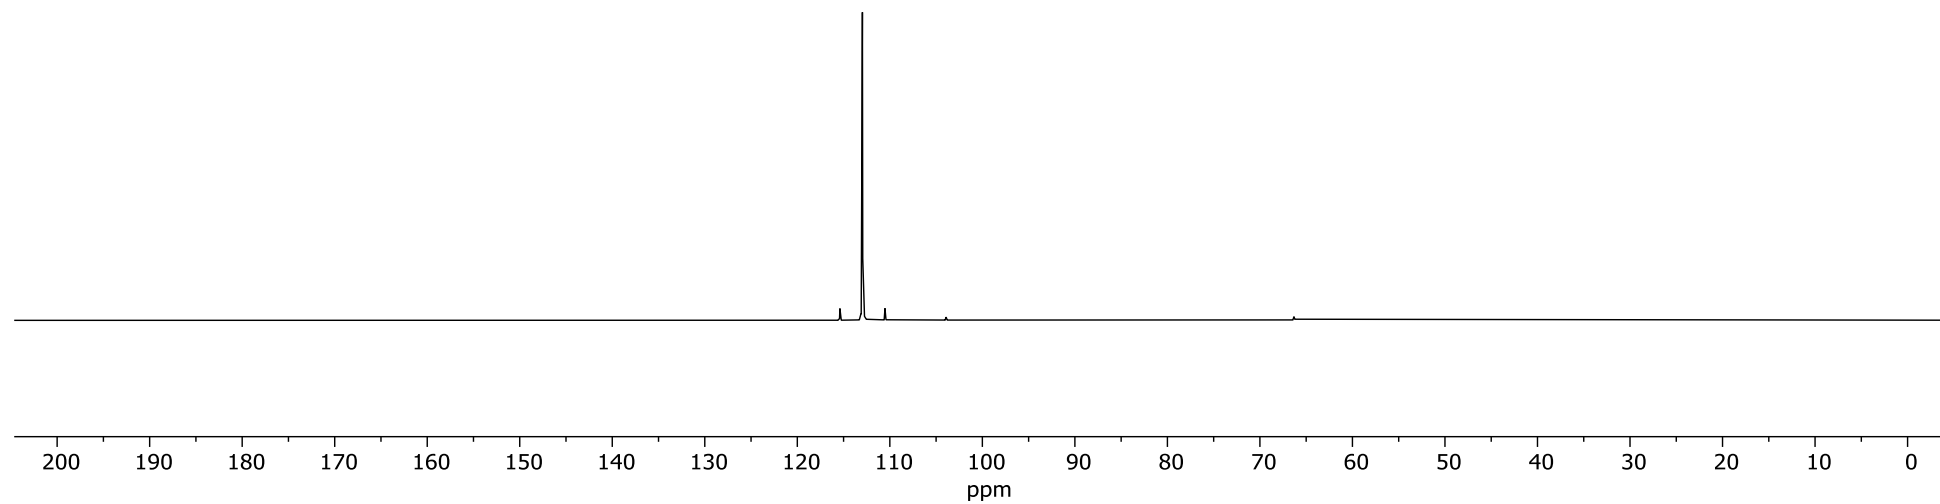

Supplement: d1ob00287b1.pdf [file d1ob00287b1.pdf]
